# Supplementary material
Source: publisher figshare collection journal article supplement (https://asha.figshare.com/articles/dataset/_/14044091)
Supplement: Supplementary file 1 [file 1]

# Guía de Conectividad en Telepráctica y Solución de Problemas para Clientes de Telepráctica

Usando la Aplicación Zoom

Kimberly Fiddler, M.S. CF-SLP

## Tabla de Contenido

- A. [Sobre Telepráctica](#)
- B. [Sobre la Aplicación Zoom](#)
- C. [Usando Zoom](#)
  - a. Descargar Zoom
    - i. [Computadora de escritorio \(MAC, PC\) y ordenador portátil \(MAC, PC\)](#)
    - ii. [iPhone, iPad](#)
    - iii. [Android](#)
    - iv. [Chromebook](#)
  - b. [Chat](#)
  - c. [Reuniones](#)
  - d. [Contactos](#)
  - e. [Funciones de usuario de Zoom](#)
    - i. [Silenciar](#)
    - ii. [Detener Video](#)
    - iii. [Invitar](#)
    - iv. [Participantes](#)
    - v. [Compartir Pantalla](#)
    - vi. [Chatear](#)
    - vii. [Grabar](#)
    - viii. [Finalizar reunión](#)
- D. Usando Zoom en dispositivos específicos
  - a. [Computadora de escritorio de Windows, Ordenador portátil de Windows, Tableta de Windows](#)
    - i. Unirse a una reunión
      - 1. A través de email
        - a. Ingresar/ Unirse de pantalla de inicio
        - b. Unirse sin ingresar
    - ii. Empezar una reunión
    - iii. Invitar
    - iv. Probando el audio
      - 1. Antes de Unirse a una reunión
      - 2. Durante una reunión
    - v. Probando el micrófono
      - 1. Antes de Unirse a una reunión
      - 2. Durante una reunión
  - b. [Chromebook](#)
    - i. Unirse a una reunión

1. Unirse una reunión
    2. Ingresar
  - ii. Empezar una reunión
  - iii. Invitar
  - iv. Probando el audio
  - v. Probando el micrófono
  - c. [Computadora de escritorio de MAC, Ordenador portátil de MAC](#)
    - i. Unirse a una reunión
      1. A través de email
      2. A través de la pantalla de inicio
    - ii. Empezar una reunión
    - iii. Invitar
    - iv. Probando el audio
      1. Antes de Unirse a una reunión
      2. Durante una reunión
    - v. Probando el micrófono
      1. Antes de Unirse a una reunión
      2. Durante una reunión
  - d. [iPad](#)
    - i. Unirse a una reunión
      1. A través de email
      2. A través de la pantalla de inicio
    - ii. Empezar una reunión
    - iii. Invitar
    - iv. Probando el audio
    - v. Probando el micrófono
  - e. [iPhone](#)
    - i. Unirse a una reunión
      1. A través de email
      2. A través de la pantalla de inicio
    - ii. Empezar una reunión
    - iii. Invitar
    - iv. Probando el audio
    - v. Probando el micrófono
  - f. [Android](#)
    - i. Unirse a una reunión
      1. A través de email
      2. A través de la pantalla de inicio
    - ii. Empezar una reunión
    - iii. Invitar
    - iv. Probando el audio
    - v. Probando el micrófono
- E. Preguntas frecuentes de Zoom

- a. [El eco](#)
- b. [Entrar al audio por teléfono](#)

#### A. Sobre Telepráctica

- a. Telepractice es el uso de tecnología para conectar a profesionales, como los patólogos del habla y lenguaje (SLP) con clientes que necesitan servicios independientemente de la distancia (cita publicada en inglés y traducida al español) (Symon, 2001).
- b. El uso de telepráctica en patología de habla y lenguaje está creciendo cada día.
- c. Telepráctica puede ser una manera rentable y conveniente para ofrecer tratamiento a gente con acceso limitado a servicios de transportación o servicios, como las que viven en zonas rurales o remotas.

#### B. Sobre la aplicación Zoom

- a. Zoom es software de videoconferencia seguro y encriptado basado en la red.
  - i. Cumple con HIPAA: “Firmamos el Acuerdo de Asociado Comercial de HIPAA (BAA) para nuestros clientes de atención médica (mínimo \$ 200), lo que significa que somos responsables de mantener la seguridad de su información del paciente y reportar violaciones de seguridad que involucren información de salud personal. No tenemos acceso a información de salud identificable, y protegemos y encriptamos todos los datos de audio, video y uso compartido de pantalla.” (cita publicada en inglés y traducida al español) (Zoom Communications, Inc., 2017).

#### C. Usando Zoom

- a. Descargar Zoom
  - i. Computadora de escritorio (MAC, PC) y ordenador portátil (MAC, PC)
    - 1. Automáticamente
      - a. Haga clic en el enlace en el email de invitación.

Unirse a la reunión Zoom

<https://pdx.zoom.us/j/465348901?pwd=S1E3b0MveG9hMWFKS3ZSNGwydEJWUT09>

ID de reunión: 465 348 901

Contraseña: 408625

Móvil con un toque

+17207072699,,465348901# Estados Unidos (Denver)

+16465588656,,465348901# Estados Unidos (Nueva York)

- b. Una nueva ventana de la red abrirá. Haga clic en 'descargue y ejecute Zoom.'

Si el navegador web no inicia nada, [descargue y ejecute Zoom](#).

- c. Su computadora se le pedirá si desea guardar el archivo en su computadora. Elige 'save file' (guarda el archivo).

Opening Zoom\_7522bc6ec4a73ae3.exe

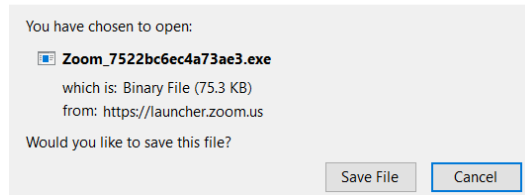

- d. Se abrirá una ventana de instalación de Zoom y cuando termine la descarga, se abrirá Zoom.

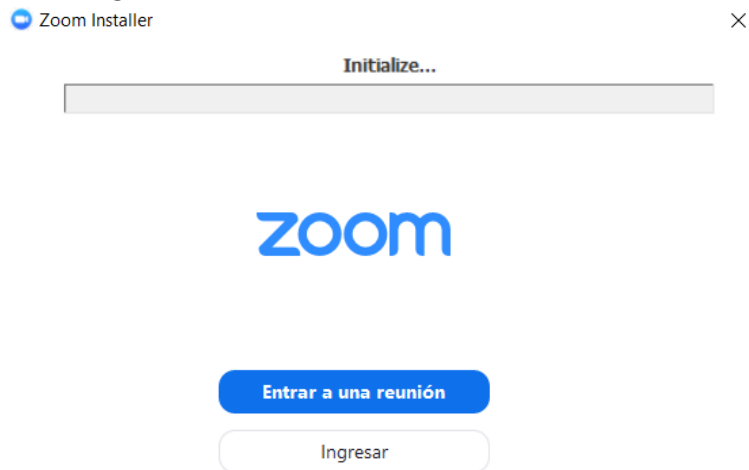

## 2. Manualmente

- a. Ir a <https://zoom.us/download>
- b. Elige 'descargar' debajo 'Cliente Zoom para reuniones.'

## Ciente Zoom para reuniones

El cliente para el navegador se descargará de manera automática cuando comience o se una a su primera reunión Zoom. También se puede descargar de manera manual aquí.

Descargar

Versión 4.6.2 (14747.1216)

- c. Su computadora se le pedirá si desea guarda el archivo en su computadora. Elige 'save file' (guarda el archivo).

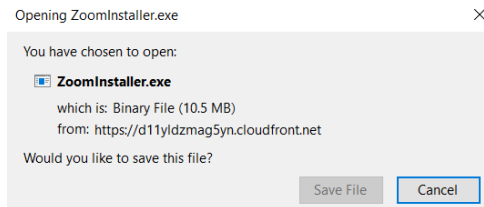

- d. Se abrirá una ventana de instalación de Zoom y cuando termine la descarga, se abrirá Zoom.

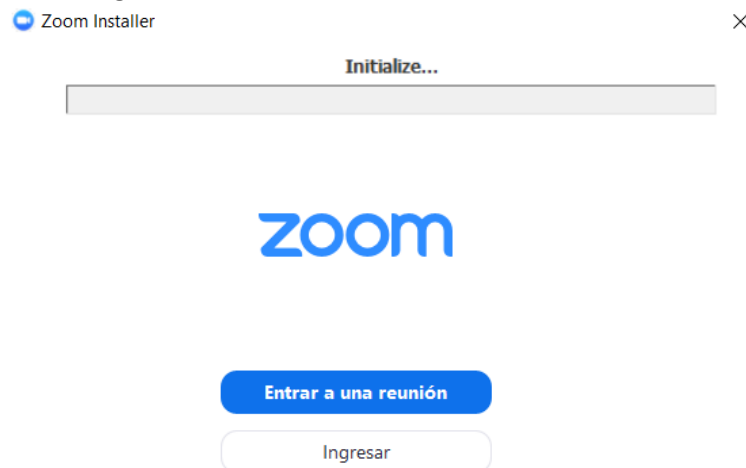

- e. Si Zoom no abre automáticamente, vaya al explorador de archivos de su computadora. Haga clic en 'descargos,' y 'zoom installer.'

### ii. iPhone, iPad

#### 1. Automáticamente

- a. Haga clic en el enlace en el email de invitación.

to me ▾

Unirse a la reunión Zoom

<https://us04web.zoom.us/j/834496480?pwd=Ly9QUiRUQjhBZkorcEtmalp0ZWJhUT09>

- b. Una ventana de la red abrirá. Haga clic en el enlace del 'App Store' en el parte inferior derecho de la pantalla.

Si es su primer uso, descargue la aplicación Zoom de [App Store](#).

- c. El App Store abrirá en la página de descargar Zoom. Haga clic en 'get.'

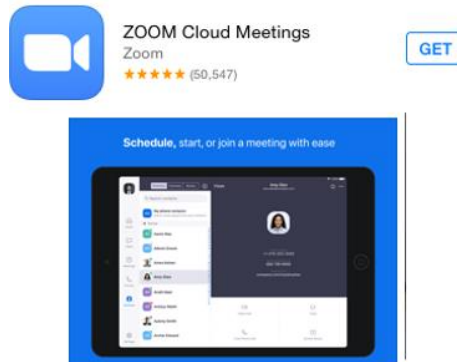

- d. Cuando termine la descarga, haga clic en 'open.'

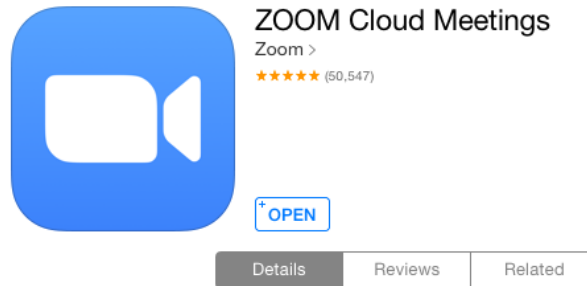

- e. Zoom abrirá y puede registrarse, ingresar, o entrar a una reunión.

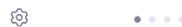

### Start a Meeting

Start or join a video meeting on the go

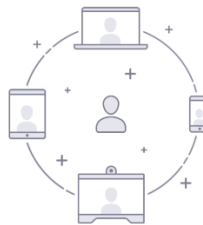

Entrar a una reunión

[Inscribirse](#)

[Ingresar](#)

2. Manualmente

- a. Haga clic en el 'App Store.'

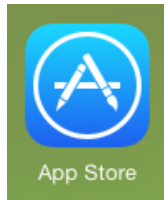

- b. Busca 'Zoom cloud meetings.'

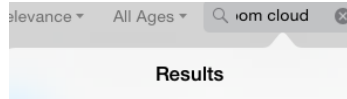

zoom cloud meetings

- c. Haga clic en 'get.'

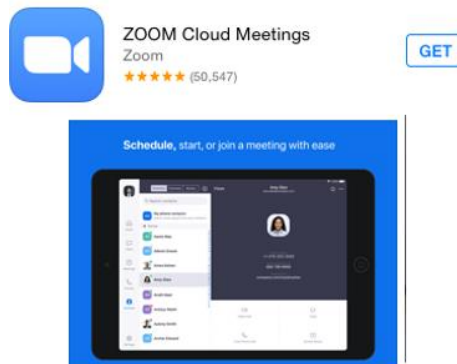

- d. Cuando termine la descarga, haga clic en 'open.'

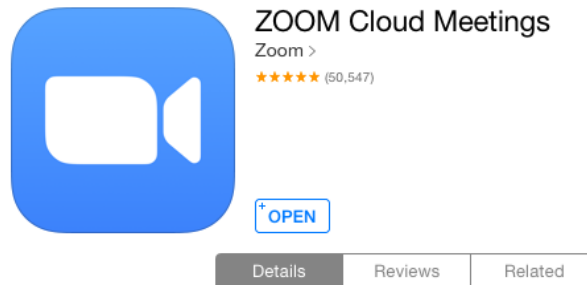

- e. Zoom abrirá y puede registrarse, ingresar, o entrar a una reunión.



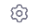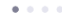

### Start a Meeting

Start or join a video meeting on the go

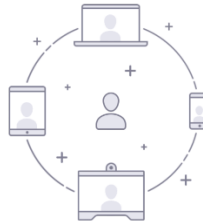

Entrar a una reunión

Inscribirse

Ingresar

### iii. Android

#### 1. Automáticamente

- a. Haga clic en el enlace en el email de invitación.

to me ▾

Unirse a la reunión Zoom

<https://us04web.zoom.us/j/834496480?pwd=Ly9QUlRUQjhBZkorcEtmalp0ZWJhUT09>

- b. Una página nueva abrirá para descargar la aplicación. Haga clic en 'Descargar de Google Play.'

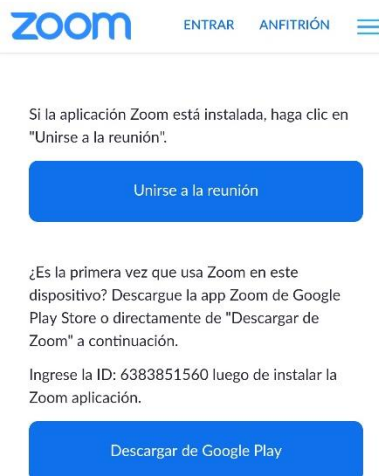

- c. Google Play abrirá. Haga clic en 'instalar.'

← Google Play 🔍 ⋮

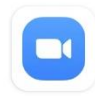

**ZOOM Cloud Meetings**

zoom.us

4.4 ★  
87K reviews

10M+  
Downloads

**E**  
Everyone ⓘ

Instalar

d. Haga clic en 'abrir.'

← Google Play 🔍 ⋮

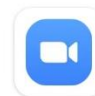

**ZOOM Cloud Meetings**

zoom.us

Desinstalar

Abrir

e. Zoom abrirá y puede registrarse, ingresar, o entrar a una reunión.

Entrar a una reunión

Registrarse

Ingresar

2. Manualmente

a. Navegue a la aplicación 'Play Store.'

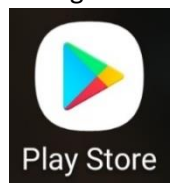

b. Busca 'Zoom cloud meetings.'

← zoom cloud meetings ✕

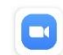

ZOOM Cloud Meetings

c. Haga clic en 'instalar.'

← Google Play 🔍 ⋮



**ZOOM Cloud Meetings**

zoom.us

4.4 ★  
87K reviews

10M+  
Downloads

**E**  
Everyone

Instalar

d. Haga clic en 'abrir.'

← Google Play 🔍 ⋮



**ZOOM Cloud Meetings**

zoom.us

Desinstalar

Abrir

e. Zoom abrirá y puede registrarse, ingresar, o entrar a una reunión.

Entrar a una reunión

Registrarse

Ingresar

iv. Chromebook

1. Automáticamente

a. Haga clic en el enlace del email de invitación.

Unirse a la reunión Zoom

<https://pdx.zoom.us/j/465348901?pwd=S1E3b0MveG9hMWFKS3ZSNGwydEJWUT09>

b. Una página nueva de la red abrirá. Haga clic en 'install from Chrome Web Store' (instalar de la tienda de Chrome Web).

Add Zoom to Chrome

Clicking the button below will open a new tab page to guide you to Chrome Web Store.  
Once the new tab page is opened, click "Add to Chrome" button.

 Install from Chrome Web Store

During installation process, do not close this page. You will join the meeting automatically.

c. La tienda de Chrome Web abrirá. Haga clic en 'Add to Chrome' (añadir a Chrome).

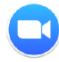

Zoom

Offered by: <https://zoom.us>

★★★★★ 118 | Productivity | 1,683,449 users

- d. Una nueva ventana abrirá mostrándole cual permisos tiene Zoom después de añadirlo. Haga clic en 'add app' (añadir app).

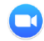

Add "Zoom"?

It can:

Exchange data with any device on the local network or internet

Write to files and folders that you open in the application

Use your microphone and camera

Communicate with cooperating websites

Capture content of your screen

Add app

Cancel

- e. Zoom abrirá.

## 2. Manualmente

- a. Navegue a la tienda de Chrome de Google.  
b. Busca 'Zoom.' Haga clic en 'add to Chrome' (añadir a Chrome).

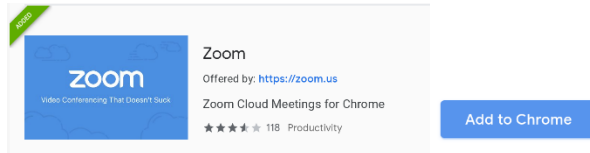

- c. Una nueva ventana abrirá mostrándole cual permisos tiene Zoom después de añadirlo. Haga clic en 'add app' (añadir app).

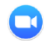

Add "Zoom"?

It can:

Exchange data with any device on the local network or internet

Write to files and folders that you open in the application

Use your microphone and camera

Communicate with cooperating websites

Capture content of your screen

Add app

Cancel

- d. Zoom abrirá.

## b. Chatear

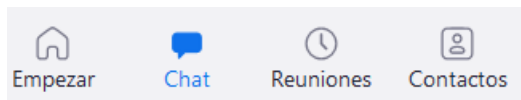

- i. Se puede acceder a la función de chat haciendo clic en el icono de la burbuja de chat en la parte superior de su página de inicio.  
ii. Esta área le permite enviar y recibir mensajes de sus contactos agregados.

c. Reuniones

- i. Integración con el calendario del cliente de escritorio (tomado de [zoom.us](https://zoom.us))
  1. Si le gustaría ver sus reuniones programadas en la página 'reuniones' de Zoom, necesita integrar su calendario y contactos a Zoom. Si no desea que aparezcan las reuniones programadas, no necesita seguir estos pasos.
  2. Inicie sesión a Zoom en línea ([zoom.us](https://zoom.us)).
  3. Navegue a 'perfil' en la parte izquierda de la pantalla.

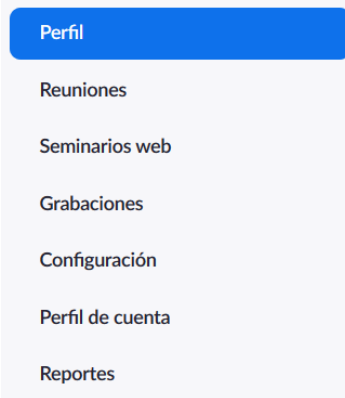

4. Desplazarse hacia abajo a encontrar 'integración del calendario y los contactos.' Haga clic en 'conectarse al servicio de calendario y contactos.'

Integración del calendario y los contactos

Puede integrarse con servicios o aplicaciones de terceros, como Google, Outlook o Exchange, para sincronizar el calendario y los contactos.

Conectarse al servicio de calendario y contactos

5. Se le pedirá elegir cual servicio le gustaría usar, Google, Exchange, o Office 365.

### Seleccione un servicio

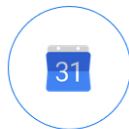

Google

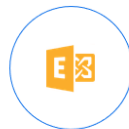

Exchange

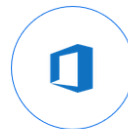

Office 365

a. Google

- i. De vez en cuando haya elegido Google, una ventana abrirá abajo del 'seleccione un servicio.' Asegúrese de que las casillas de la siguiente foto estén marcadas.

- ✓ Permitir que Zoom obtenga el calendario de eventos
- ✓ Permitir que Zoom sincronice los contactos

Siguiente

- ii. Seleccione cual cuenta de email desea usar.
- iii. Google se le pedirá dar permisiones a Zoom para acceder su calendario y contactos. Seleccione 'aceptar' para todas las solicitudes.
- iv. Será redirigido al portal en línea de Zoom para mostrar que sus contactos y calendario están integrados. Asegúrese de que los botones estén habilitados (azul).

Permitir que Zoom obtenga el calendario de eventos

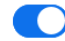

Permitir que Zoom sincronice los contactos

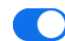

- v. Sus reuniones programadas aparecerán en la página 'reuniones' de la aplicación de Zoom. Para unirse, haga clic en 'iniciar.'

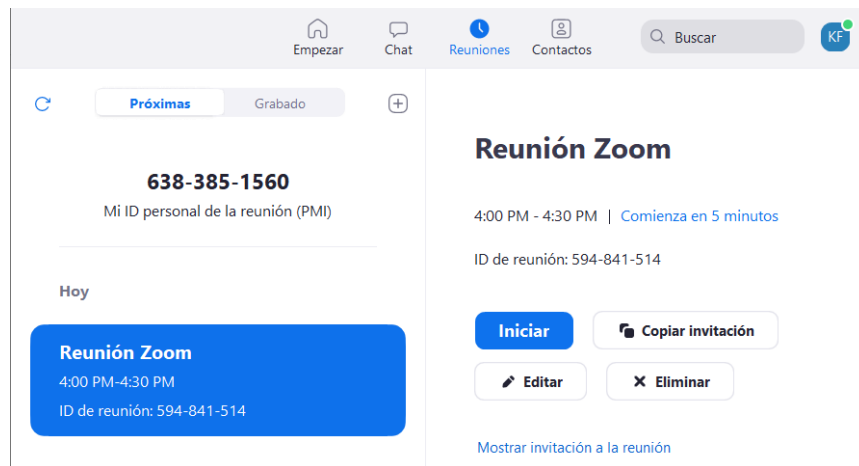

b. Exchange

- i. Ingrese su nombre de usuario y contraseña asociados con su cuenta de Exchange.
- ii. Seleccione la versión de intercambio. Si no sabe qué seleccionar, comuníquese con su departamento de TI.
- iii. Ingrese su URL de EWS. Si no sabe qué ingresar, comuníquese con su departamento de TI.

Meeting Settings > Add a Calendar Service



**Exchange**  
Connect your shared Exchange resource calendars

Exchange login username or UPN

molly.parker@zoom.us

Exchange login password

\*\*\*\*\*

Exchange Version

Exchange 2016

EWS URL

Enter the EWS(Exchange Web Service) URL found in EMC/ECP. Be sure to include the https:// portion of the URL.

Authorize Cancel

- iv. Será redirigido al portal en línea de Zoom para mostrar que sus contactos y calendario están integrados. Asegúrese de que los botones estén habilitados (azul).

Permitir que Zoom obtenga el calendario de eventos

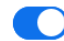

Permitir que Zoom sincronice los contactos

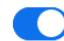

- v. Sus reuniones programadas aparecerán en la pestaña de reuniones en la pantalla de inicio de Zoom. Para unirse, haga clic en 'iniciar.'

Empezar Chat Reuniones Contactos

Buscar

Próximas Grabado

**638-385-1560**  
Mi ID personal de la reunión (PMI)

Hoy

**Reunión Zoom**  
4:00 PM - 4:30 PM  
ID de reunión: 594-841-514

**Reunión Zoom**  
4:00 PM - 4:30 PM  
ID de reunión: 594-841-514

Iniciar Copiar invitación

Editar Eliminar

Mostrar invitación a la reunión

c. Office 365

- i. Elige un método de autorización. Esto depende de los requisitos de seguridad de su organización. Póngase en contacto con su equipo de TI interno si no está seguro de cuál elegir.

- ii. Ingrese su nombre usuario y contraseña.
- iii. La URL de EWS se completará con la URL de EWS predeterminada para Office 365. Déjelo como predeterminado a menos que su cuenta de Office 365 use una configuración única.

[Meeting Settings](#) > Add a Calendar Service

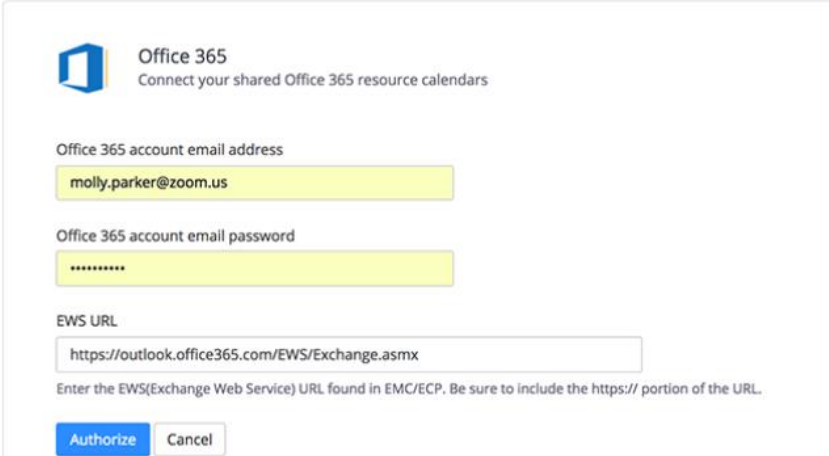

- iv. Será redirigido al portal en línea de Zoom para mostrar que sus contactos y calendario están integrados. Asegúrese de que los botones estén habilitados (azul).
- v. Sus reuniones programadas aparecerán en la pestaña de reuniones en la pantalla de inicio de Zoom. Para unirse, haga clic en 'iniciar.'

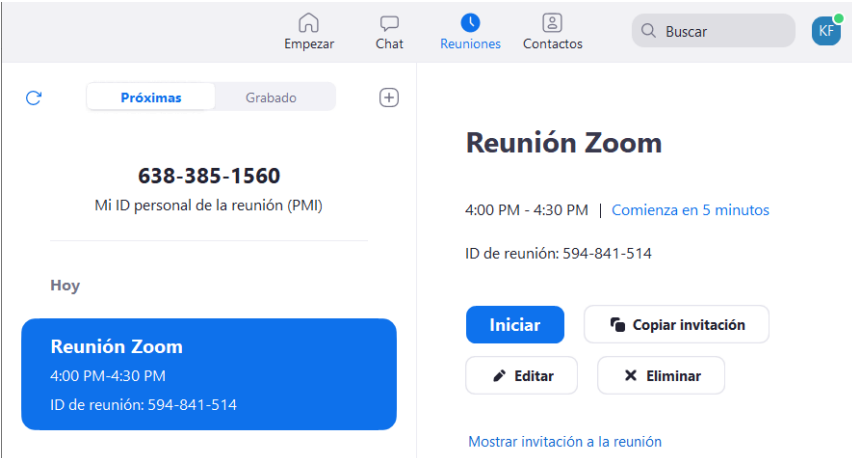

#### d. Contactos

NOTA: De Chromebook, no puede añadir contactos nuevos, solo puede ver sus contactos y si están en línea o no.

##### i. Añadir contactos

1. Navegue a la página de contactos desde la pantalla de inicio.



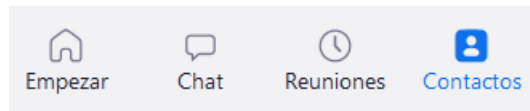

2. Elige el botón 'más' y elige 'añadir contacto.'

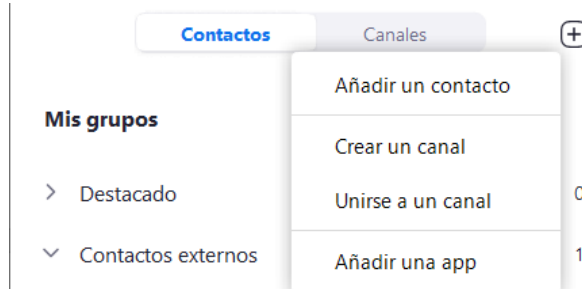

3. Se le pedirá entrar el email de la persona que desea invitar como contacto.

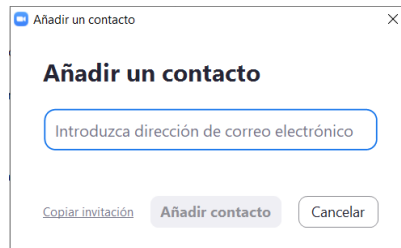

4. Se agregarán como contacto una vez que acepten.

ii. Aceptar una invitación de contacto

1. Cuando ingrese a Zoom, habrá una notificación encima de 'chat.'

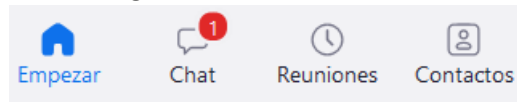

2. Haga clic en esto y la página de 'chat' abrirá. Verá una 'notificación del sistema,' haga clic en esto.

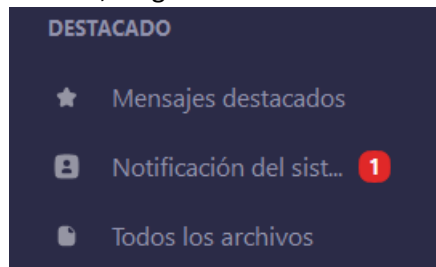

3. Se le mostrara quien le envió una invitación y se le dará la opción de aceptar o declinar.

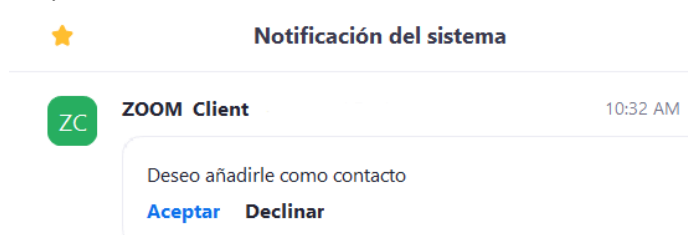

e. Funciones de usuario de Zoom

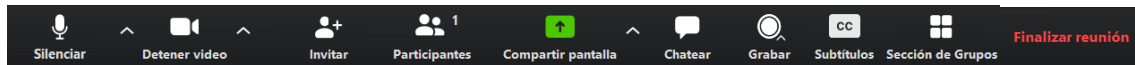

- i. Silenciar
  1. Puede silenciar su audio para que otros no puedan escucharse.
- ii. Detener Video
  1. Detiene su video para que otros no puedan verse.
- iii. Invitar
  1. Invitar otros participantes.
  2. Consulte la sección 'invitar' de su [dispositivo específico](#) para obtener más detalles.

- iv. Participantes
  1. Esto abre la pantalla de participantes donde puede ver los nombres de los participantes en la reunión.

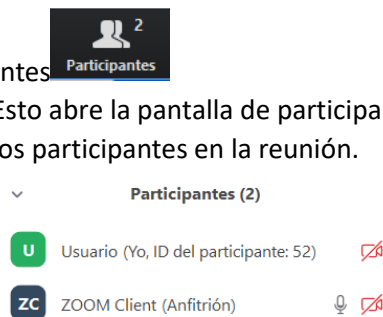

- a. Haga clic en 'levantar la mano' y una mano aparecerá al lado de su nombre.

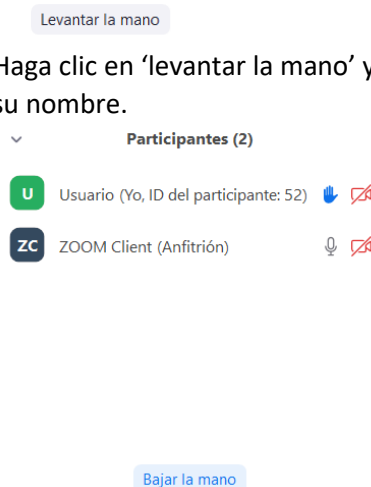

- b. Haga clic en 'bajar la mano' para eliminar la mano.

- v. Compartir pantalla
  1. Compartir pantalla actual

- a. Haga clic en 'pantalla' para compartir todo lo que ve actualmente menos la reunión de Zoom.

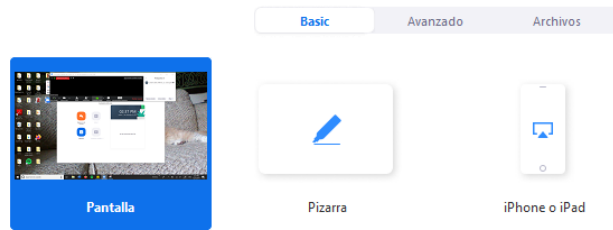

- i. Puede elegir 'compartir sonido de la computadora' y 'optimizar clip de video para pantalla completa' en la parte inferior de la ventana para permitir los demás oír los sonidos de su computadora y para hacer la compartir pantalla lo mejor para videos.

☐ Compartir sonido de la computadora ☐ Optimizar clip de video para pantalla completa

- b. Para acceder las funciones, haga clic en 'anotar.' Consulte la sección ['anotar/pizarra'](#) para más información.

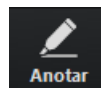

## 2. Pizarra

- a. Haga clic en 'pizarra' para abrir un documento en blanco que puede editar para que los demás vean en tiempo real.

Seleccionar la ventana o la aplicación que usted desea compartir

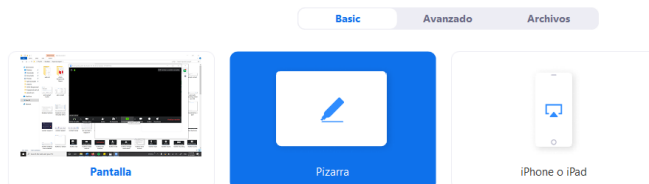

- b. Para acceder las funciones, haga clic en 'pizarra.' Consulte la sección ['anotar/pizarra'](#) para más información.

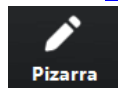

## 3. Funciones de compartir pantalla

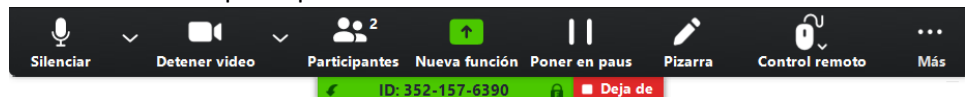

- a. Silenciar
    - i. Silenciar su mismo para que los otros no lo oigan.
  - b. Detener video
    - i. Detener el video para que los otros no puedan ver el video.
  - c. Participantes
    - i. Abrir la pantalla de los participantes.

- d. Nueva función
  - i. Compartir algo nuevo con los otros.
- e. Poner en paus
  - i. Pausa compartir pantalla.

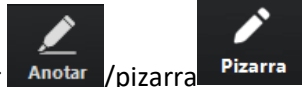

- f. Anotar /pizarra

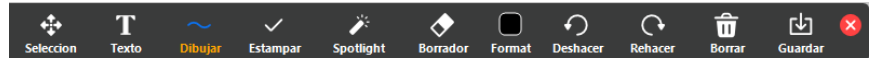

- i. Selección
  - a. Esto le permite seleccionar anotaciones (texto, sellos, etc.) agregadas al recurso compartido de pantalla para que pueda moverlas por la pantalla y colocarlas en una nueva área.
- ii. Texto
  - a. Poner texto en lo que está compartiendo.
- iii. Dibujar
  - a. Dibujar en su pantalla para que los demás lo vean.

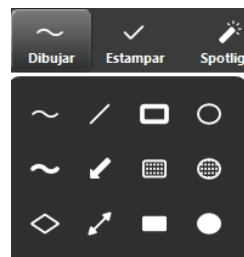

- iv. Estampar
  - a. Poner un sello en la pantalla para llevar atención a una cosa en la pantalla.

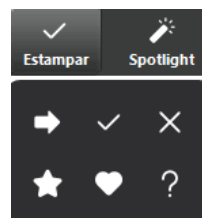

- v. Spotlight

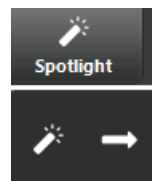

- a. Puede usar una luz roja para que los otros puedan ver dónde está su ratón en la pantalla.

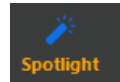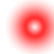

- b. Puede usar flecha para poner una flecha en la pantalla.

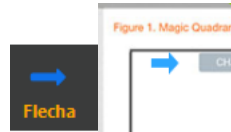

#### vi. Borrador

- a. Borrar cosas (dibujos, texto, otras cosas) de la pantalla.

#### vii. Format

- a. Seleccione color, grosor de línea, estilo de texto (negrita, cursiva) y tamaño de fuente para dibujo, texto, etc.

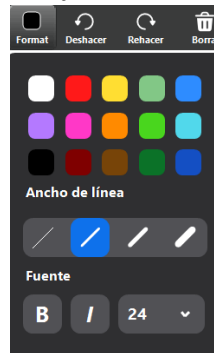

#### viii. Deshacer

- a. Deshacer la última acción.

#### ix. Rehacer

- a. Rehacer una acción deshecha.

#### x. Borrar

- a. Borrar todos los dibujos, los dibujos suyos, o los dibujos del espectador.

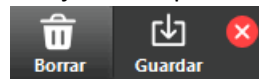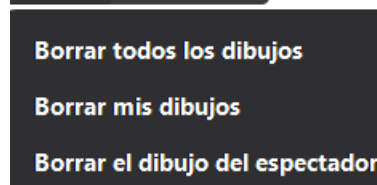

#### xi. Guardar

- a. Guardar la pantalla actual con todos los dibujos, textos, etc.

#### xii. Más

- a. Esto abrirá una lista de funciones generales. Consulte la sección anterior para obtener más información sobre [chatear](#), [invitar](#), [grabar](#), etc.
- b. También puede inhabilitar anotación de los otros participantes y mostrar los nombres de los anotadores.

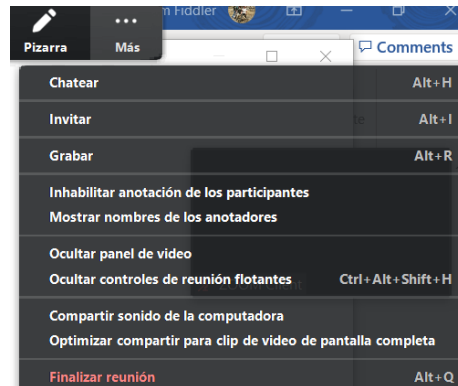

- g. Remote control
  - i. Ceder el control del mouse/teclado a otro participante de la reunión o aceptar automática todas las solicitudes para el control del mouse/teclado.

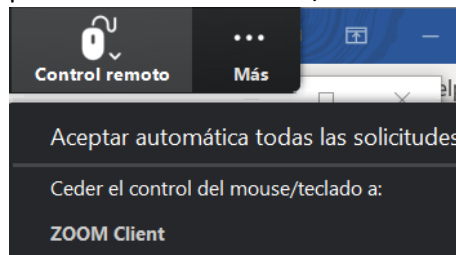

#### vi. Chatear

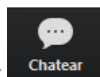

1. Haga clic en esto abre una ventana al lado del video para enviar mensajes a todos los participantes de la reunión. También puede enviar mensajes a participantes ciertos.

Chat de grupo de Zoom

Enviar a: Todos  Archivo   
Escribir mensaje aquí...

vii. Grabar

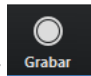

1. Si deseas grabar, necesita permiso del hospedador.

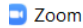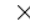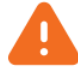

**Solicite permiso al hospedador de la reunión para grabar.**

OK

viii. Finalizar reunión

1. Haga clic en esto botón cuando desea terminar la reunión. Si Ud. es el anfitrión, tiene la opción de 'terminar la reunión para todos,' o 'salir de la reunión.' Si Ud. es un usuario, solo puede 'salir de la reunión.'

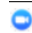

¿Finalizar reunión o salir de la reunión?

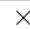

Para mantener activa esta reunión, asigne un hospedador antes de hacer clic en Salir de la reunión.

Finalizar la reunión para todos

Salir de la reunión

Cancelar

- a. 'Salir de la reunión' significa que los demás todavía puede estar en la reunión, sin usted.
- b. 'Finalizar la reunión' significa que la reunión termina para todos los participantes.

D. Conectar a Zoom de dispositivos específicos

- a. Computadora de escritorio de Windows, Ordenador portátil de Windows, Tableta de Windows

NOTA: Antes de unirse la reunión, la aplicación de Zoom debe descargarse. Por favor consulte la sección '[descargar Zoom](#)' para más información.

i. Unirse a una reunión

1. A través de email

- a. Recibirá un email con el enlace de la reunión. Haga clic en el enlace y Zoom abrirá.

to me ▾

Unirse a la reunión Zoom

<https://us04web.zoom.us/j/834496480?pwd=Ly9QUiRUQjhBZkorcEtmalp0ZWJhUT09>

- b. Zoom abrirá y puede 'ingresar' o 'entrar a una reunión.'

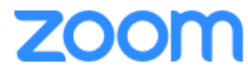

Entrar a una reunión

Ingresar

- c. Ingresar/Desde pantalla de inicio
  - i. Se le pedirá entrar su email y contraseña.

**Ingresar** [Iniciar sesión de manera gratu.](#)

Introducir el correo electrónico

Introducir la nueva [¿Se le ha olvidado?](#)

- ii. Elige 'entrar.'

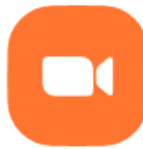

Nueva reunión ▾

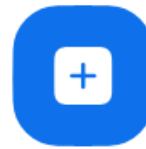

Entrar

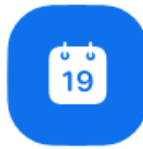

Agendar

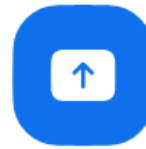

Compartir pantalla

- iii. Se le pedirá entrar el ID de reunión, un número único de 9, 10 u 11 dígitos que se encuentra en el email de invitación. También puede entrar un nombre para su mismo para que los otros sepan quien es.



 Zoom

✕

### Unirse a una reunión

☐ Conectar Sin Audio☐ Conectar Sin Video**Entrar**

Cancelar

- iv. Se le pedirá entrar la contraseña de la reunión, un numero de 6 dígitos, que también se encuentra en el email de invitación.

 Zoom

✕

### Introduzca la contraseña de la reunión

- v. La reunión empezará, y se le pedirá que quiere usar para su audio. Elige 'entrar al audio por computadora'



¿Que opción de audio desea para entrar a la reunión?

✕

 Entrar por teléfono **Audio de la computadora****Entrar al audio por computadora**

Probar el audio de la computadora

☐

Seleccionar automáticamente el audio de la computadora al entrar a una reunión

- d. Entrar a una reunión sin ingresar
- i. Esta opción es lo mismo de la opción arriba, aunque no tiene que entrar su email y contraseña. Por favor, consulte la sección anterior '[unirse a una reunión](#)' para las instrucciones de como unirse una reunión.
- ii. Empezar una reunión
1. Inicia sesión en Zoom.
  2. Elige 'nueva reunión.'

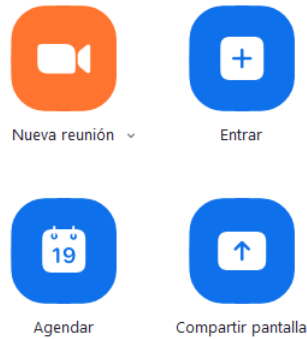

3. Una ventana emergente abrirá para que elijas la opción del audio quiere. Elige 'entrar al audio por computadora.'

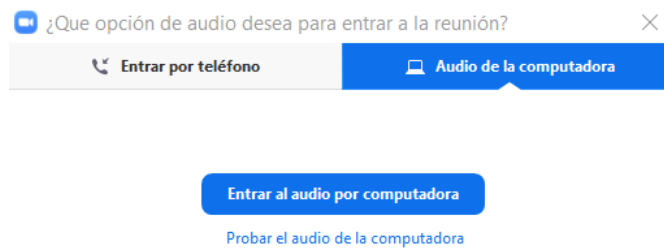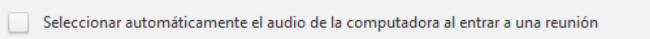

4. Su reunión empezará y puede invitar a otras personas para unirla.
- iii. Invitar
1. Inicia sesión en Zoom.
  2. Elige 'nueva reunión.'

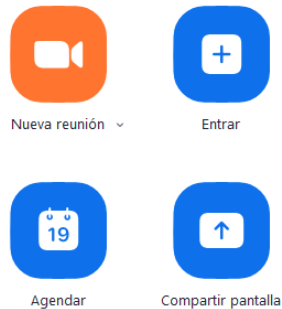

3. En la parte inferior izquierda de la pantalla de reunión, haga clic en 'Invitar' para abrir sus opciones de invitar.

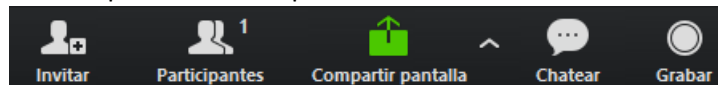

4. Puede invitar a otras personas por email, contactos, copiar la dirección de la página web, o copiar invitación.
5. Invitar por e-mail

[Invitar por e-mail](#)[Invitar por IM](#)

Elija su servicio de e-mail para enviar la invitación

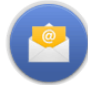

E-mail  
predeterminado

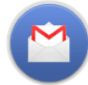

Gmail

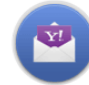

Yahoo Mail

[Copiar URL](#)[Copiar invitación](#)

Contraseña de la reunión: 711136

- a. Se le pedirá usar 'e-mail predeterminado,' 'Gmail,' o 'Yahoo mail'
  - b. Elige la opción que le gustaría.
  - c. Le llevará a su servidor de e-mail para enviar correos electrónicos pre escritos a aquellos a quienes desea invitar.
6. Invitar por IM
  - a. Use esto si el e-mail de la persona que desea invitar ya se ha agregado a sus contactos.
    - i. Consulte la sección '[contactos](#)' para más información.
  - b. Seleccione el nombre de sus clientes haciendo clic en su contacto o buscando su nombre.
  - c. Haga clic en 'invitar' en la esquina inferior derecha.
7. Copiar la dirección de la página web (URL)

[Copiar URL](#)

- a. Esto copiará el enlace a su portapapeles y puede pegarlo en cualquier lugar para enviarla a las personas que desea invitar.
8. Copiar invitación

[Copiar invitación](#)

- a. Esto copiará el email de invitación con el enlace y toda la otra información del email a su portapapeles. Puede pegarla donde desea para invitar a otras personas.

#### iv. Probando el audio

1. Antes de Unirse a una reunión
  - a. Inicia sesión en Zoom.
  - b. Haga clic en 'configuración.'

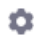

- c. Haga clic en 'audio.'

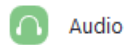

- d. Encontrará una sección de 'altavoz. Haga clic en 'altavoz.'

Haga clic en Probar altavoz para asegurarse de que puede oír a los demás

**Altavoz**

Altavoz

Speakers (Realtek High Definition Au... ▾

Nivel de salida:

Volumen:   

- e. Se reproducirán varios tonos desde el altavoz y se le preguntará si los escucha. Si no los escucha, use el menú a la derecha del botón "altavoz" para elegir otro altavoz hasta que escuche los tonos. Asegúrese de que el volumen sea alto y los altavoces no estén silenciados.

- i. Si no funciona, consulte la sección '[entrar al audio por teléfono](#)' para conectar a la reunión.

2. Durante una reunión

- a. Navegue a los controles en la esquina inferior izquierda de la pantalla de la reunión. Haga clic en la flecha al lado de 'silenciar.'

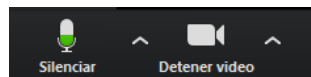

- b. Elige 'probar altavoz y micrófono.'

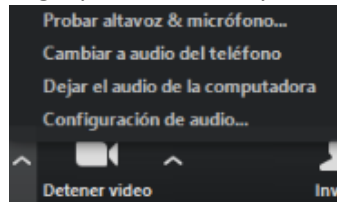

- c. Aparecerá un cuadro emergente y le preguntará si escucha el tono. Haga clic en "sí" o "no". Si no escucha el sonido, intente usar el menú desplegable para cambiar los altavoces hasta que escuche el sonido.

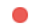

Usted tiene 2 altavoces; ahora está probando el altavoz 2...

**¿Escucha un tono de llamada?**

Sí

No

Altavoz 2: Built-in Output (Internal Speakers) ▾

Nivel de salida: 

- i. Si no lo escucha, consulte la sección '[entrar al audio por teléfono](#)' para conectar a la reunión.
- v. Probando el micrófono

- 1. Antes de Unirse a una reunión

- a. Iniciar sesión en Zoom.
    - b. Haga clic en 'configuración' en la esquina superior derecho.

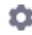

- c. Haga clic en 'audio.'

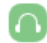

Audio

- d. Encontrará una sección de 'micrófono,' haga clic en 'micrófono.'

**Micrófono**

Micrófono

Microphone Array (Realtek High Defi... ▾

Nivel de entrada:

Volumen: 

- e. Zoom le pedirá que hable para que pueda grabar su voz. Zoom reproducirá la grabación y le preguntará si la escucha.

Hable cerca del micrófono.

**Micrófono**

Grabando

Microphone Array (Realtek High Defi... ▾

Nivel de entrada:

- f. Si no la escucha, usa el menú desplegable para elegir un micrófono diferente hasta que escuche su voz.

Si no puede escuchar su voz, seleccione un micrófono diferente.

**Micrófono**

Reproduciendo

Microphone Array (Realtek High Defi... ▾

Nivel de entrada:

- g. Si no lo escucha, consulte la sección '[entrar al audio por teléfono](#)' para conectar a la reunión.

- 2. Durante una reunión

- a. Navegue a los controles en la esquina inferior izquierda de la pantalla de la reunión. Haga clic en la flecha al lado de 'silenciar.'

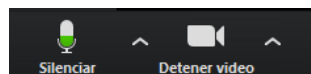

- b. Elige 'probar altavoz & micrófono.'

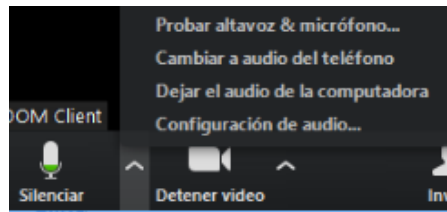

- c. Aparecerá un cuadro emergente y le pedirá que hable y grabe. Luego lo reproducirá y le preguntará si lo escuche. Haga clic en 'sí' o 'no.' Si no escucha su voz, intente usar el menú desplegable para cambiar el micrófono hasta que escuche la grabación.

Probando micrófono...

**Hable y deténgase, ¿escucha una repetición?**

Sí

No

Micrófono 1: Microphone Array (Realtek High Definiti...

Nivel de entrada:

- i. Si no lo escucha, consulte la sección '[entrar al audio por teléfono](#)' para conectar a la reunión.

b. Chromebook

NOTA: Antes de unirse la reunión, la aplicación de Zoom debe descargarse. Consulte la sección '[descargar Zoom](#)' para más información.

NOTA 2: ZOOM para Chromebook solo está disponible en inglés. Por lo tanto, las fotos están en inglés y se explicarán en relación con los botones en inglés, que también se traducirán al español.

i. Unirse a una reunión

1. Recibirá un email con el enlace de la reunión. Haga clic en el enlace y ZOOM abrirá.

to me ▾

Unirse a la reunión Zoom

<https://us04web.zoom.us/j/834496480?pwd=Ly9QUiRUQjhBZkorcEtmalp0ZWJhUT09>

2. ZOOM abrirá y el ID de reunión ya estará entrado para unir la reunión. Ingrese un nombre para que otros sepan quién es usted. Haga clic en 'join' (unirse).

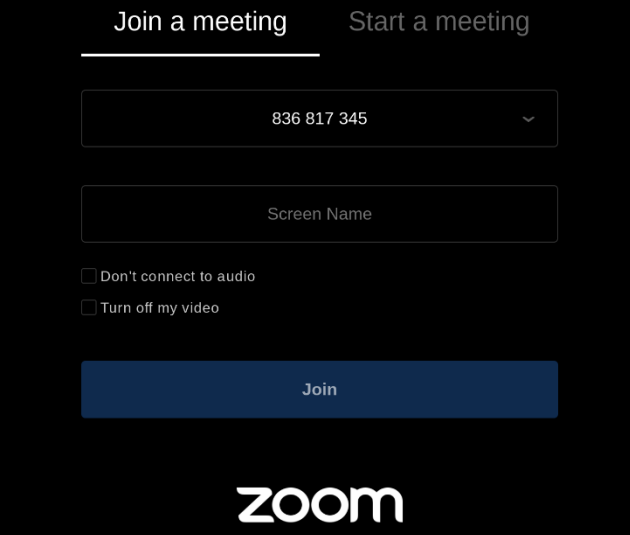

The image shows the 'Join a meeting' screen on the Zoom website. At the top, there are two tabs: 'Join a meeting' (selected) and 'Start a meeting'. Below the tabs, there is a dropdown menu showing the meeting ID '836 817 345'. Underneath is a text input field for 'Screen Name'. There are two checkboxes: 'Don't connect to audio' and 'Turn off my video'. At the bottom is a large blue 'Join' button. The Zoom logo is at the very bottom.

3. La reunión empezará.

ii. Empezar una reunión

1. Abre ZOOM y haga clic en 'sign in' (ingresar) en la parte superior de la página.

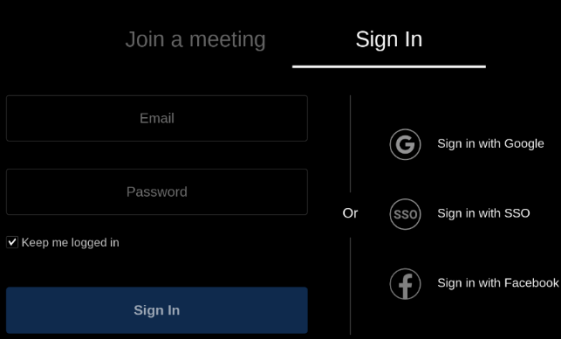

The image shows the 'Sign In' screen on the Zoom website. At the top, there are two tabs: 'Join a meeting' and 'Sign In' (selected). Below the tabs, there are two text input fields for 'Email' and 'Password'. To the right of these fields are three social login options: 'Sign in with Google' (with a Google G icon), 'Sign in with SSO' (with an SSO icon), and 'Sign in with Facebook' (with a Facebook f icon). There is an 'Or' separator between the password field and the social login options. Below the input fields is a checkbox labeled 'Keep me logged in' which is checked. At the bottom is a large blue 'Sign In' button.

2. Cuando haya ingresado, haga clic en 'start a meeting' (empezar una reunión) en la parte superior de la página.

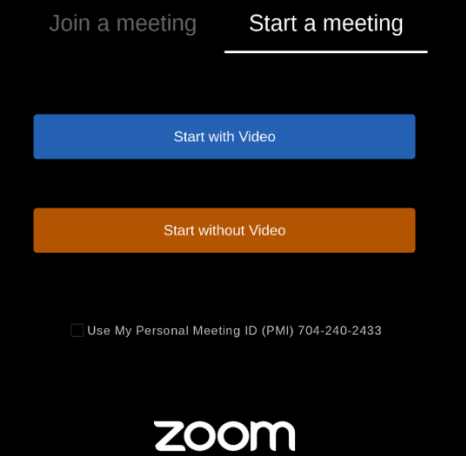

The image shows the 'Start a meeting' screen on the Zoom website. At the top, there are two tabs: 'Join a meeting' and 'Start a meeting' (selected). Below the tabs, there are two large buttons: a blue 'Start with Video' button and an orange 'Start without Video' button. At the bottom, there is a checkbox labeled 'Use My Personal Meeting ID (PMI) 704-240-2433'. The Zoom logo is at the very bottom.

a. Empezar con video ('start with video,' el botón azul).

- i. Cuando elija esto, la reunión empezará con su video ya encendido.
- b. Empezar sin video ('start without video,' el botón anaranjado)
  - i. Cuando elija esto, la reunión empezará con su video apagado.
  - ii. Reiniciar video durante la reunión
    - 1. Si desea reiniciar el video durante una reunión, haga clic en el botón 'start video' (reiniciar video).

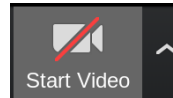

- 3. Su reunión empezará.

### iii. Invitar

- 1. Inicia sesión en ZOOM y haga clic en 'start a meeting' (empezar una reunión).
- 2. Cuando su reunión haya empezado, haga clic en el botón 'invite' (invitar) en la parte inferior de la pantalla.

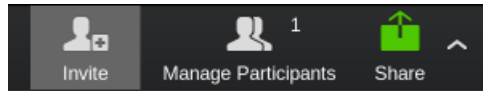

- 3. Puede invitar a otras personas por email, contactos, copiar URL o copiar invitación.

#### a. Invitar por email.

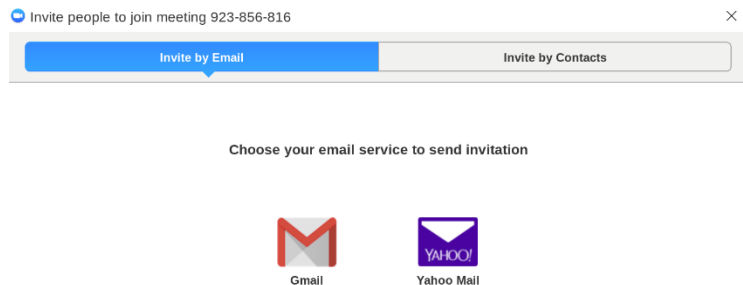

Copy URL Copy Invitation Meeting Password: 439214

- i. Se le pedirá usar 'Gmail,' o 'Yahoo mail'
- ii. Elige la opción que le gustaría.
- iii. Le llevará a su servidor de e-mail para enviar correos electrónicos pre escritos a aquellos a quienes desea invitar.
- b. Invitar por contactos



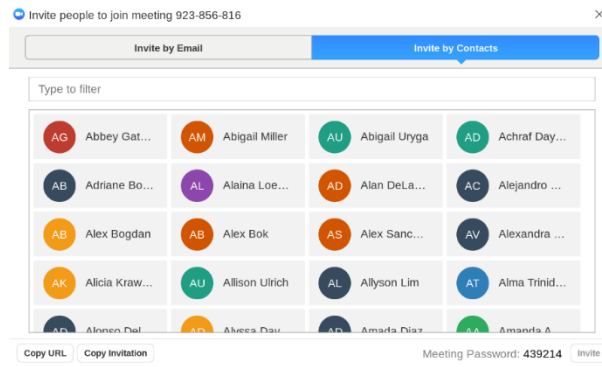

- i. Use esto si el e-mail de su cliente ya se ha agregado a sus contactos.
    1. Consulte la sección de [‘contactos’](#) para más información.
  - ii. Seleccione el nombre de sus clientes haciendo clic en su contacto o buscando su nombre.
  - iii. Haga clic en ‘invitar’ en la esquina inferior derecha.
- c. Copiar la dirección de la página web (URL)

**Copiar URL**

- i. Esto copiará el enlace a su portapapeles y puede pegarlo en cualquier lugar para enviarla a las personas que desea invitar.
- d. Copiar invitación

**Copiar invitación**

- i. Esto copiará el email de invitación con el enlace y toda la otra información del email a su portapapeles. Puede pegarla donde desea para invitar a otras personas.

iv. Probando el audio

1. Durante una reunión

- a. Haga clic en la flecha al lado del símbolo del micrófono en la esquina inferior izquierda.

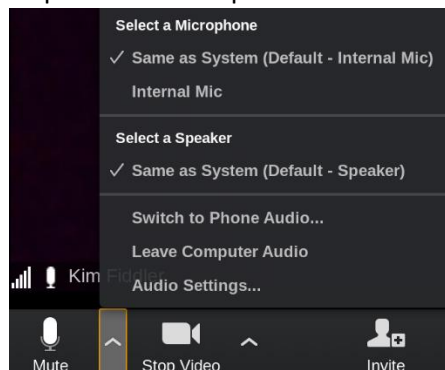

- b. Si tiene un altavoz diferente, elíjalo debajo de 'select a speaker' (selecciona un altavoz) para que Zoom pueda usarlo en vez del altavoz predeterminado.
    - c. Si no tiene otro altavoz, o si no funciona, puede '[entrar al audio por teléfono](#)' (join by phone audio).
  - v. Probando micrófono
    - 1. Durante una reunión
      - a. Haga clic en la flecha al lado del símbolo de micrófono en la esquina inferior izquierda.

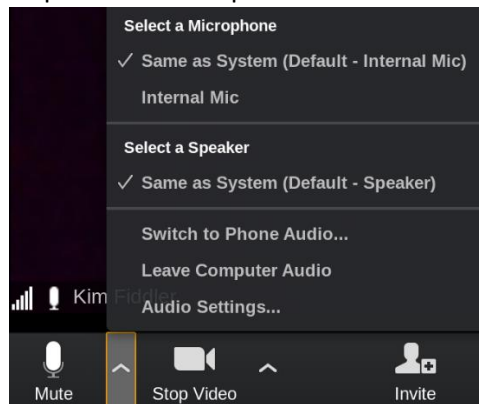

- b. Si tiene otro micrófono, elíjalo debajo de 'select a microphone' (elige un micrófono) para que Zoom pueda usarlo.
      - c. Si no tiene otro micrófono, o si no funciona, puede '[entrar al audio por teléfono](#)' (join by phone audio).
  - c. Computadora de escritorio de MAC, Ordenador portátil de MAC
 

NOTA: Antes de unirse la reunión, la aplicación de Zoom debe descargarse. Consulte la sección '[descargar Zoom](#)' para más información.

i. Unirse a una reunión

1. A través de email

- a. Recibirá un email con el enlace de la reunión. Haga clic en el enlace y Zoom abrirá.

to me ▾

Unirse a la reunión Zoom

<https://us04web.zoom.us/j/834496480?pwd=Ly9QUiRUQjhBZkorcEtmalp0ZWJhUT09>

- b. Una ventana de la red abrirá y se le pedirá si puede abrir la aplicación Zoom. Dale permiso abrir la aplicación.

Open zoom.us?

<https://us04web.zoom.us> wants to open this application.

Cancel

Open zoom.us

- c. Su reunión empezará.

2. A través de pantalla de inicio
  - a. Inicia sesión en Zoom.
  - b. Haga clic en 'entrar.'

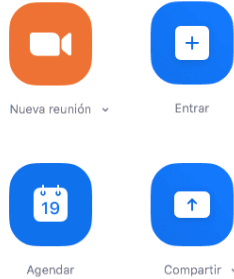

- c. Entrar la ID de reunión (se encuentra en el email de invitación) y su nombre.

**Entrar a una reunión**

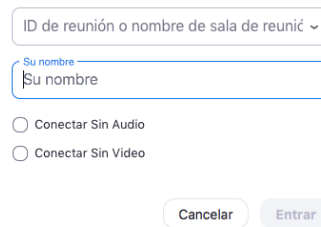

The image shows the 'Entrar a una reunión' (Join a Meeting) form. It has a dropdown menu for 'ID de reunión o nombre de sala de reunión', a text input field for 'Su nombre', and two radio buttons: 'Conectar Sin Audio' and 'Conectar Sin Video'. At the bottom are 'Cancelar' and 'Entrar' buttons.

- d. Introduzca la contraseña (se encuentra en el email de invitación).

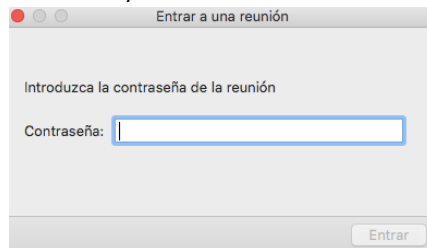

The image shows a window titled 'Entrar a una reunión' with the instruction 'Introduzca la contraseña de la reunión'. It contains a text input field labeled 'Contraseña:' and an 'Entrar' button at the bottom right.

- e. Su reunión empezará.

ii. Empezar una reunión

1. Inicia sesión en Zoom.
2. Haga clic en 'nueva reunión.'

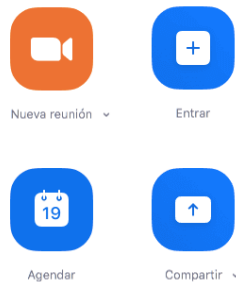

3. Su reunión empezará y puede invitar a otras personas para unirla.

iii. Invitar

1. Inicia sesión en Zoom.

2. Haga clic en 'nueva reunión.'

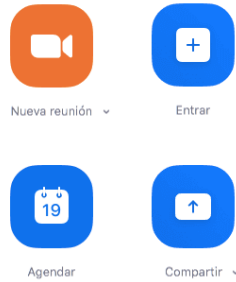

3. Verá en la parte inferior izquierda de la pantalla hay un botón para 'invitar.' Haga clic en esto botón para abrir sus opciones de invitar.

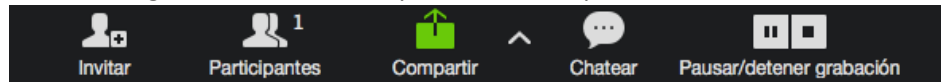

4. Puede invitar a otras personas por email, contactos, copiar la dirección de la página web, o copiar invitación.

- a. Invitar por Email

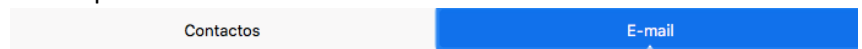

**Elija su servicio de e-mail para enviar la invitación**

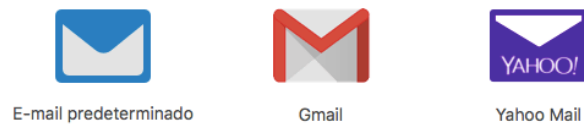

[Copiar la dirección de la página web](#)

[Copiar invitación](#)

Contraseña de la reunión: 522900

- i. Se le pedirá usar 'e-mail predeterminado,' 'Gmail,' o 'Yahoo mail'
  - ii. Elige la opción que le gustaría.
  - iii. Le llevará a su servidor de email para enviar correos electrónicos pre escritos a aquellos a quienes desea invitar.
- b. Contactos

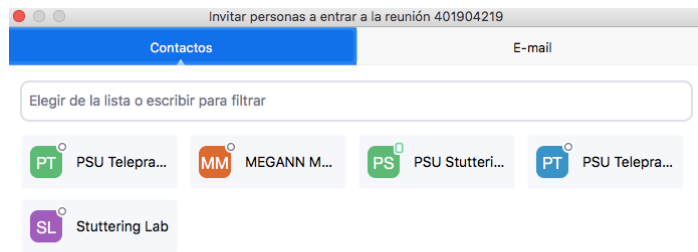

[Copiar la dirección de la página web](#) [Copiar invitación](#) Contraseña de la reunión: 522 [Invitar](#)

- i. Usa esto si el email de su contacto ya ha agregado a sus contactos de Zoom.
  1. Consulte la sección de este manual [‘contactos’](#) para más información.
- ii. Elige el nombre de su contacto o busca su nombre.
- iii. Haga clic en ‘invitar’ en el parte inferior derecho.
- c. Copiar la dirección de la página web

#### [Copiar la dirección de la página web](#)

- i. Esto copiará el enlace a su portapapeles y puede pegarlo en cualquier lugar para enviarla a las personas que desea invitar.
- d. Copiar invitación
  - i. Esto copiará el email de invitación con el enlace y toda la otra información del email a su portapapeles. Puede pegarla donde desea para invitar a otras personas.

#### [Copiar invitación](#)

- iv. Probando el audio
  1. Antes de unirse una reunión.
    - a. Inicia sesión en Zoom.
    - b. Haga clic en ‘configuración.’

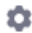

- c. Haga clic en ‘audio.’

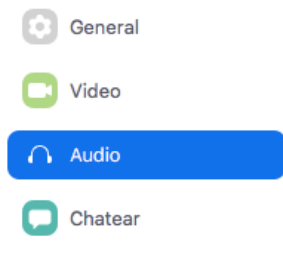

- d. Encontrará una sección de 'altavoz.' Elige 'probar altavoz.'

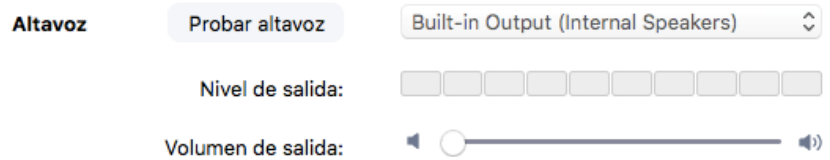

- e. Zoom emitirá un tono y le preguntará si puede escucharlo.

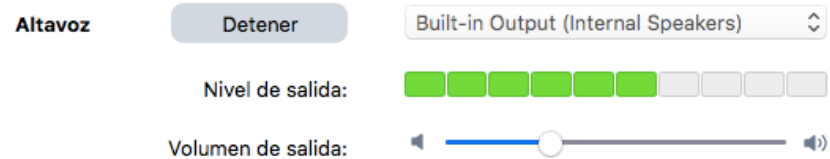

- i. Si no lo escucha, elige un altavoz diferente de la lista desplegable para probar o consulte la sección '[entrar al audio por teléfono](#)' para conectar a la reunión.

## 2. Durante una reunión

- a. Navegue a la parte inferior izquierda de la pantalla. Si el símbolo

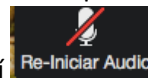

del micrófono se ve así y dice 'reiniciar audio,' haga clic en el símbolo una vez hasta que se vea como el de abajo.

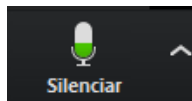

- b. Si el símbolo se ve como arriba pero el audio todavía no funciona, haga clic en el flecho al lado de 'silenciar' y elige 'probar altavoz & micrófono.'

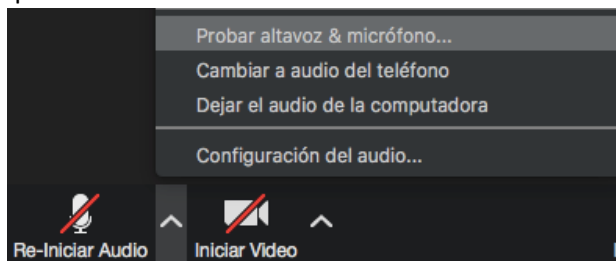

- c. Aparecerá un cuadro emergente y le preguntará si escucha el tono. Haga clic en "sí" o "no". Si no escucha el sonido, intente

usar el menú desplegable para cambiar los altavoces hasta que escuche el sonido.

Usted tiene 2 altavoces; ahora está probando el altavoz 2...

**¿Escucha un tono de llamada?**

Sí

No

Altavoz 2: Built-in Output (Internal Speakers) ⌵

Nivel de salida: 

- i. Si no lo escucha, consulte la sección '[entrar al audio por teléfono](#)' para conectar a la reunión.

v. Probando el micrófono

1. Antes de Unirse a una reunión

- a. Inicia sesión en Zoom y haga clic en 'configuraciones.'

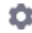

- b. Haga clic en 'audio'

 General

 Video

 **Audio**

 Chatear

- c. Encontrará una sección de 'micrófono,' haga clic en 'micrófono.'

**Micrófono**

Micrófono

Built-in Microphone (Internal Microphon... ⌵

Nivel de entrada: 

Volumen de entrada: 

- d. Zoom le pedirá que hable para que pueda grabar su voz. Zoom reproducirá la grabación y le preguntará si la escucha.

**Micrófono**

Reproduciendo

Built-in Microphone (Internal Microphon... ⌵

Nivel de entrada: 

Volumen de entrada: 

- e. Si no lo escucha, consulte la sección '[entrar al audio por teléfono](#)' para conectar a la reunión.

2. Durante una reunión

- a. Navegue a los controles en la esquina inferior izquierda de la pantalla de la reunión. Haga clic en la flecha al lado de 'silenciar.'

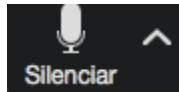

- b. Elige 'probar altavoz & micrófono.'

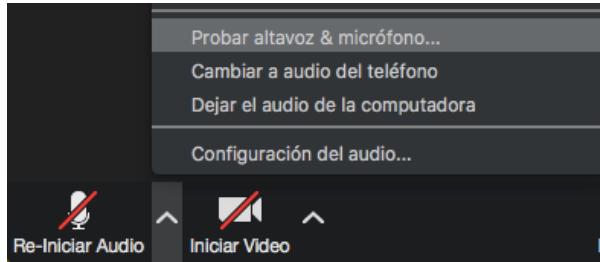

- c. Una ventana nueva abrirá y Zoom probará su altavoz primero. Sigue las instrucciones.

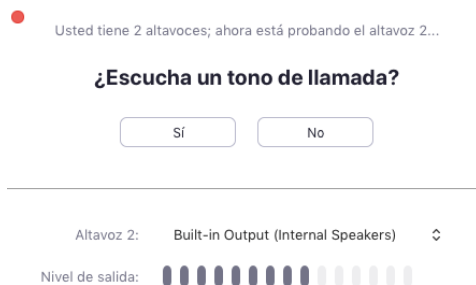

- d. De vez en cuando Zoom haya terminado probando el altavoz, probará el micrófono. Zoom le pedirá que hable para que puedan grabar su voz. Zoom reproducirá la grabación y le preguntará si la escucha.

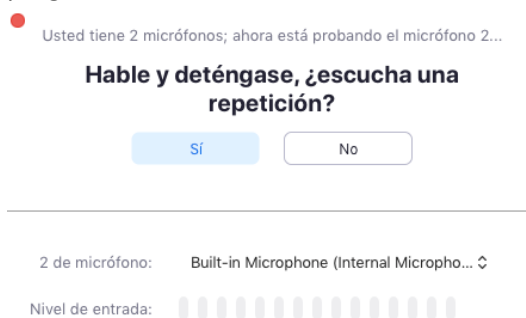

- e. Si escuchas la grabación, elige 'sí,' si no la escuchas, elige 'no.'
- Si no la escuchas, Zoom probará otros micrófonos, si uno tiene.



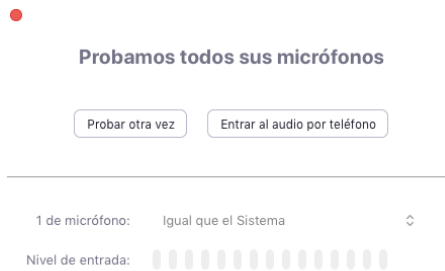

- ii. Si no lo escucha, consulte la sección '[entrar al audio por teléfono](#)' para conectar a la reunión.

d. iPad

NOTA: Antes de unirse la reunión, la aplicación de Zoom debe descargarse. Consulte la sección '[descargar Zoom](#)' para más información.

i. Unirse a una reunión

1. A través de email

- a. Recibirá un email con el enlace de la reunión. Haga clic en el enlace y ZOOM abrirá.

Unirse a la reunión Zoom

<https://pdx.zoom.us/j/465348901?pwd=S1E3b0MveG9hMWFKS3ZSNGwydEJWUT09>

- b. Se le pedirá unir su audio y le dará unas opciones. Elige 'marcar utilizando de Internet.'

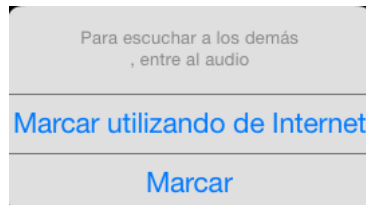

i. Marcar utilizando de Internet

- 1. Cuando elijas esto, su reunión empezará inmediatamente y no necesita hacer nada más.

ii. Marcar

- 1. Si su iPad tiene capacidades celulares y desea usarlas, elija 'marcar.'
- 2. Una ventana nueva aparecerá y se le pedirá elegir cual número de teléfono le gustaría llamar.

|                                                                                                                                                                      |                  |
|----------------------------------------------------------------------------------------------------------------------------------------------------------------------|------------------|
| Cerrar                                                                                                                                                               | Estados Unidos ▾ |
| <p>CONSEJO: conserve su llamada en la aplicación<br/>Tras conectar con el audio a través del teléfono, asegúrese de volver a la aplicación de la reunión de Zoom</p> |                  |
| ESCOGER UN NÚMERO PARA MARCAR EN EL TELÉFONO                                                                                                                         |                  |
| +1 408 638 0968                                                                                                                                                      |                  |
| +1 646 558 8656                                                                                                                                                      |                  |
| INFORMACIÓN SOBRE LA REUNIÓN                                                                                                                                         |                  |
| ID de la reunión                                                                                                                                                     | 389 786 118      |
| ID del participante                                                                                                                                                  | 20               |

3. Cuando hayas llamado se le pedirá entrar el ID de la reunión y la ID del participante seguido por #.
4. Si el país o región en la parte superior de la pantalla no es correcto, tócalo una vez y otras opciones aparecerá. Elige el país correcto y usa esos números provistos para conectar a la reunión.

|           |               |
|-----------|---------------|
| < Atrás   | País o región |
| A         | A             |
| Alemania  | •             |
| Argentina | C             |
| Australia | F             |
| Austria   | H             |
| B         | J             |
| Bahréin   | M             |

5. Su reunión empezará.
2. A través de pantalla inicio
  - a. Inicia sesión en ZOOM.
  - b. Elige 'entrar.'

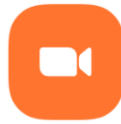

Nueva reunión

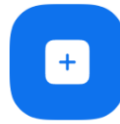

Entrar

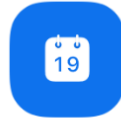

Agendar

- c. Se le pedirá entrar el ID de reunión, un código de 9, 10, o 11 dígitos se encuentra en el email de invitación. Entrar su nombre para que los demás saben quién es usted. Haga clic en 'entrar.'



The screen shows a 'Join Meeting' interface. At the top, there are two buttons: 'Cancelar' (Cancel) in blue and 'Entrar a una reunión' (Join a meeting) in black. Below these is a text input field labeled 'ID de la reunión' (Meeting ID) with a dropdown arrow on the right. Underneath is a link that says 'Incorporarse con un nombre de sala de reuniones' (Join with a meeting room name). Below that is a text input field labeled 'Nombre en pantalla' (Display name). At the bottom is a large blue button labeled 'Entrar' (Join). Below the button, there is a small note: 'Si recibió un enlace de invitación, pulse el enlace otra vez para entrar a la reunión' (If you received an invitation link, click the link again to join the meeting).

- d. Se le pedirá entrar la contraseña de la reunión que se encuentra en el email de invitación. Haga clic en 'continuar.'

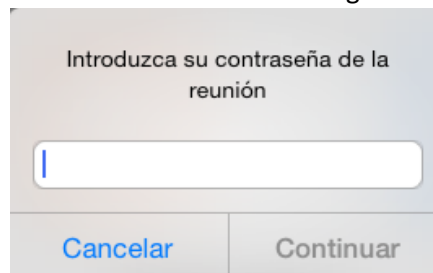

The screen shows a 'Enter Meeting Password' interface. At the top, it says 'Introduzca su contraseña de la reunión' (Enter your meeting password). Below this is a text input field for the password. At the bottom, there are two buttons: 'Cancelar' (Cancel) in blue and 'Continuar' (Continue) in black.

- e. Su reunión empezará.
- ii. Empezar una reunión
1. Inicia sesión en Zoom.
  2. Elige 'nueva reunión.'

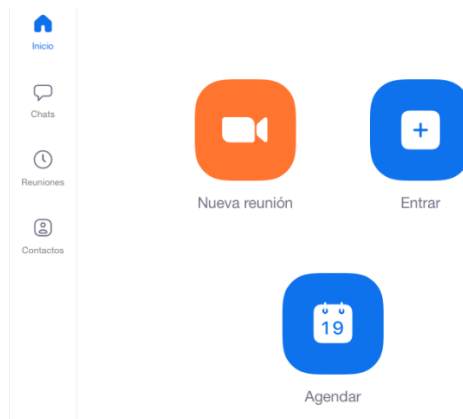

3. Se le pedirá unir su audio y le dará unas opciones. Elige 'marcar utilizando de Internet.'

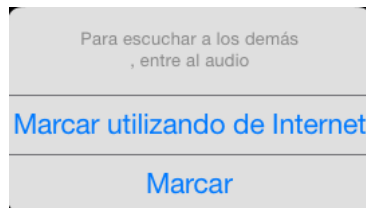

- a. Marcar utilizando de Internet
  - i. Si elige esto, su reunión empezará y no necesita hacer nada más.
- b. Marcar
  - i. Si su iPad tiene funciones celulares y desea usarlas elige 'marcar.'
  - ii. Una ventana nueva aparecerá y se le pedirá elegir cual número de teléfono le gustaría llamar.

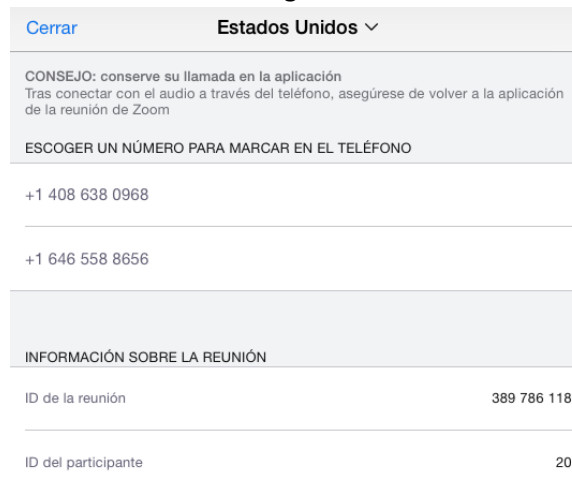

- iii. Cuando hayas llamado se le pedirá entrar el ID de la reunión y la ID del participante seguido por el signo '#.'

- iv. Si el país o región anterior no es correcto, tóquelo una vez para abrir una página donde puede elegir el país correcto y llamar a los números provistos para ese país.

| < Atrás País o región |   |
|-----------------------|---|
| A                     | A |
| Alemania              | • |
| Argentina             | • |
| Australia             | • |
| Austria               | • |
| B                     | J |
| Bahréin               | • |
|                       | M |

- v. Su reunión empezará.

### iii. Invitar

1. Inicia sesión en Zoom.
2. Elige 'nueva reunión.'

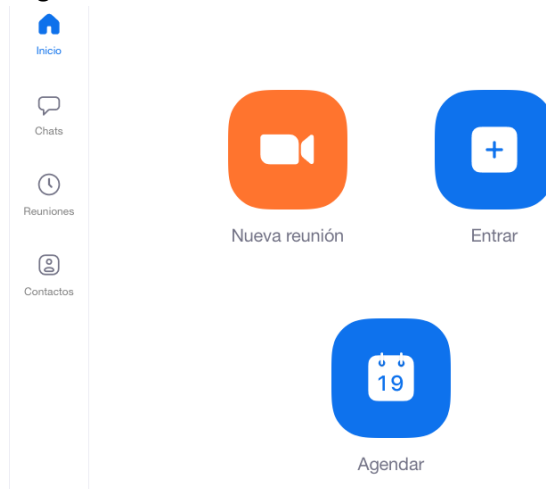

3. La reunión empezará.
4. Haga clic en el botón 'participantes' en el parte superior derecho de la pantalla. La lista de los participantes abrirá.

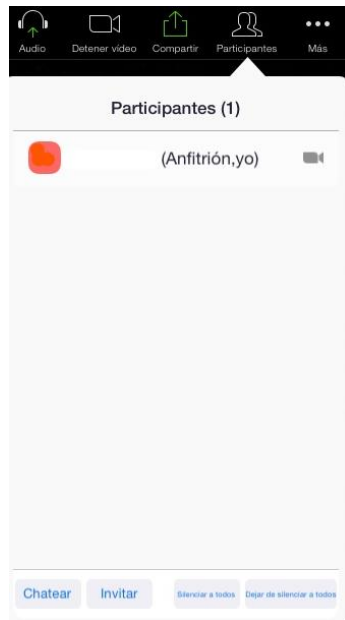

- a. En la parte inferior izquierda en la pantalla de participantes haga clic en el botón 'invitar.'



- b. Las opciones de invitar aparecerán.

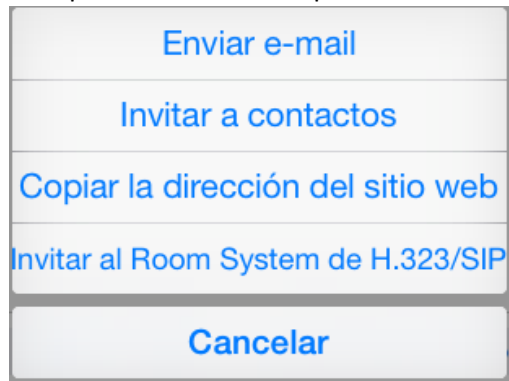

- i. Enviar email
  - 1. Esto abrirá su cuenta de email para enviar el email de invitación a otras personas.
- ii. Invitar a contactos
  - 1. Esto abrirá una ventana de sus contactos de ZOOM. Puede buscar a las personas que desea invitar e invitarlas de esta manera.
    - a. Consulte la sección '[contactos](#)' para más información.
- iii. Copiar la dirección del sitio web

1. Esto copiará el enlace a su portapapeles y puede pegarlo en cualquier lugar para enviarla a las personas que desea invitar.

iv. Invitar al Room System

1. La función de llamada del conector de sala H.323 / SIP le permite marcar a un sistema de sala H.323 o SIP desde Zoom Client utilizando la dirección IP pública o SIP URI asignado al dispositivo.
2. Para más información sobre esta función, va a la página en línea de Zoom '[room system.](#)'

iv. Probando el audio

1. Asegúrese que el audio de su dispositivo está conectado. Si el símbolo del audio se ve como la foto debajo, tócalo y elige 'marcar utilizando de internet.'

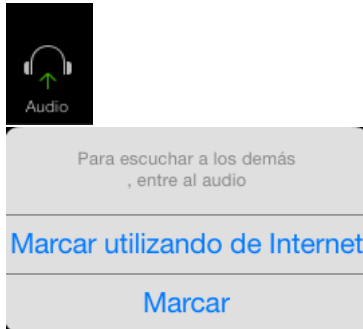

2. Incrementar o disminuir el volumen usando los botones de su dispositivo.
3. Usa audiófonos.
4. Intenta usar la función '[marcar](#)' descrita anteriormente.
5. Reiniciar su dispositivo.
6. Reinstalar ZOOM.

v. Probando el micrófono

1. Asegúrese que su micrófono no está silenciado. Si se ve como la foto debajo, tócalo una vez para encenderla.

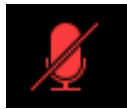

2. Asegúrese que el audio de su dispositivo está conectado. Si el símbolo del audio se ve como la foto debajo, tócalo y elige 'marcar utilizando de internet.'

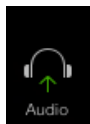

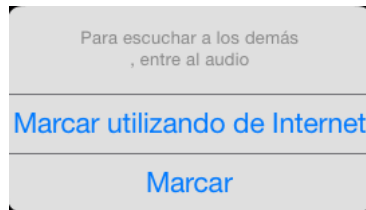

3. Intenta usar audífonos con micrófono.
4. Asegúrese que ZOOM tiene permisión de usar su micrófono. Va a Ajustes > Privacidad > Micrófono y asegúrese que ZOOM tiene permisión para usarlo.

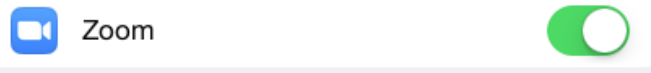

5. Cierre otras aplicaciones usando el micrófono.
6. Intenta usar la función '[marcar](#)' descrita anteriormente.
7. Si todavía este silenciado, es posible el anfitrión le ha silenciado.
8. Reinstalar ZOOM.

e. iPhone

NOTA: Antes de unirse la reunión, la aplicación de Zoom debe descargarse. Consulte la sección '[descargar Zoom](#)' para más información.

i. Unirse a una reunion

1. A través de email

- a. Recibirá un email con el enlace de la reunión. Haga clic en el enlace y Zoom abrirá.

**Ingrese Zoom a la reunión de Zoom en curso.**

hoy, 5:41 p. m.

Unirse a la reunión Zoom

<https://zoom.us/j/400660318?pwd=eTgzek45WW5aS2pXdFI3cGZ2emVHQQT09>

- b. Zoom le pedirá acceder al micrófono. Elige 'OK.'

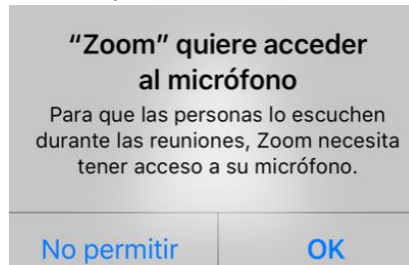

- c. Zoom le pedirá acceder la cámara. Elige 'OK.'



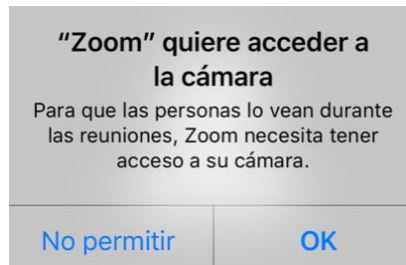

- d. Su reunión empezará. Se le pedirá unir su audio y le dará unas opciones.

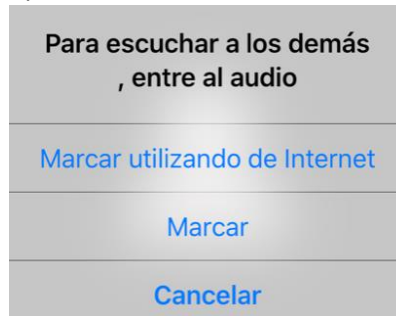

- e. Marca utilizando de internet
- i. Cuando elijas esto, su reunión empezará inmediatamente y no necesita hacer nada más.
- f. Marcar
- i. Una ventana nueva aparecerá y se le pedirá elegir cual número de teléfono le gustaría llamar.

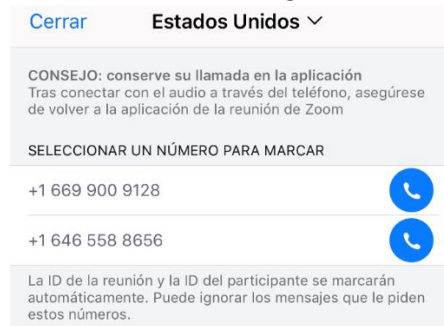

- ii. Cuando hayas llamado se le pedirá entrar el ID de la reunión y la ID del participante seguido por el signo '#.'
- iii. Si el país o región anterior no es correcto, tóquelo una vez para abrir una página donde puede elegir el país

correcto y llamar a los números provistos para ese país.

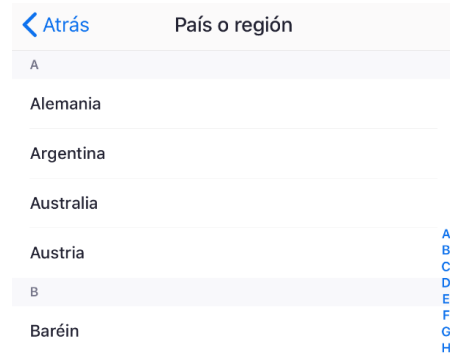

2. A través de pantalla de inicio
  - a. Inicia sesión en Zoom.
  - b. Elige 'entrar.'

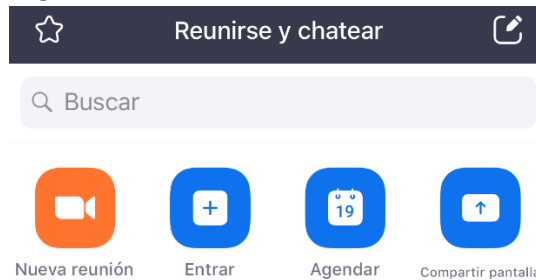

- c. Se le pedirá entrar el ID de reunión, un código de 9, 10, o 11 dígitos se encuentra en el email de invitación. Entrar su nombre para que los demás saben quién es usted. Haga clic en 'entrar.'



- d. Se le pedirá entrar la contraseña de la reunión que se encuentra en el email de invitación. Haga clic en 'continuar.'

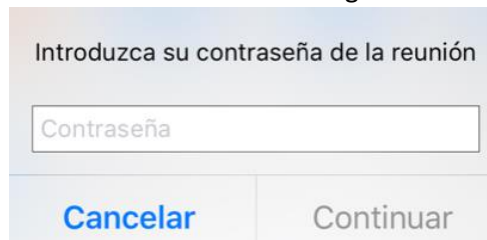

- e. Su reunión empezará.
- ii. Empezar una reunión

1. Inicia sesión en Zoom.
2. Elige 'nueva reunión.'

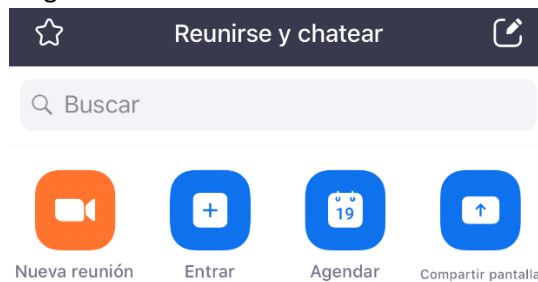

3. Se le pedirá unir su audio y le dará unas opciones.

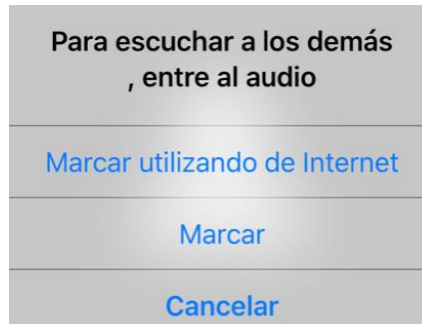

- a. Marca utilizando de internet
  - i. Cuando elijas esto, su reunión empezará inmediatamente y no necesita hacer nada más.
- b. Marcar
  - i. Una ventana nueva aparecerá y se le pedirá elegir cual número de teléfono le gustaría llamar.

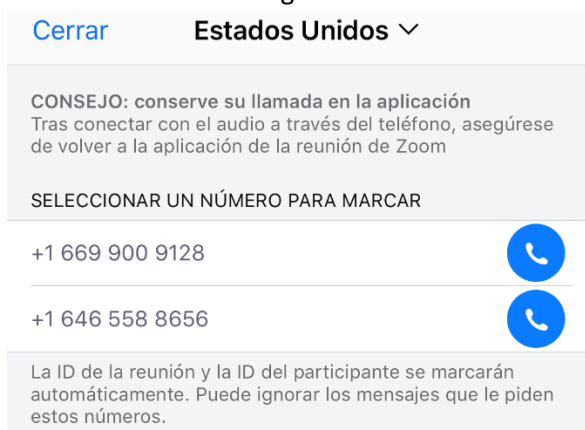

- ii. Cuando hayas llamado se le pedirá entrar el ID de la reunión y la ID del participante seguido por el signo '#.'
- iii. Si el país o región anterior no es correcto, tóquelo una vez para abrir una página donde puede elegir el país

correcto y llamar a los números provistos para ese país.

[< Atrás](#)
País o región

A

Alemania

Argentina

Australia

Austria

B

Baréin

A  
B  
C  
D  
E  
F  
G  
H

iv. Su reunión empezará.

iii. Invitar

1. Inicia sesión en Zoom.

2. Elige 'nueva reunión.'


Reunirse y chatear



Buscar


Nueva reunión


Entrar


Agendar


Compartir pantalla

3. La reunión empezará.

4. Haga clic en el botón 'participantes' en la parte inferior de la página. La lista de los participantes abrirá.


Audio


Iniciar video


Compartir


Participantes


Más

5. Haga clic en el botón 'invitar' en la parte inferior de la página de participantes.

Chatear

Invitar

6. Las opciones de invitar aparecerá.

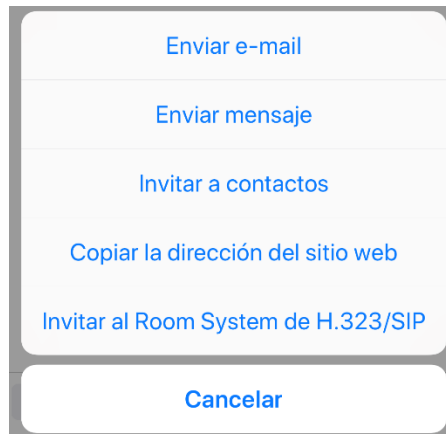

- a. Enviar email
    - i. Esto abrirá su cuenta de email para enviar el email de invitación a otras personas.
  - b. Enviar Mensaje
    - i. Esto abrirá sus mensajes de texto con el enlace de la reunión para que pueda enviarlo a cualquier persona.
  - c. Invitar a contactos
    - i. Esto abrirá una ventana de sus contactos de ZOOM. Puede buscar a las personas que desea invitar e invitarlas de esta manera.
    - ii. Consulte la sección de '[contactos](#)' para más información.
  - d. Copiar la dirección del sitio web
    - i. Esto copiará el enlace a su portapapeles y puede pegarlo en cualquier lugar para enviarla a las personas que desea invitar.
  - e. Invitar al Room System
    - i. La función de llamada del conector de sala H.323 / SIP le permite marcar a un sistema de sala H.323 o SIP desde Zoom Client utilizando la dirección IP pública o SIP URI asignado al dispositivo.
    - ii. Para más información sobre esta función, va a la página en línea de Zoom '[room system.](#)'
- iv. Probando el audio
1. Asegúrese que el símbolo del audio en la esquina superior izquierda se ve como la foto debajo.  

  1. Asegúrese que el audio esté unido a la reunión. Si ve la foto debajo, tócalo una vez para unir al audio. Elige 'marcar usando de Internet.'

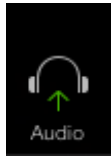

Para escuchar a los demás  
, entre al audio

Marcar utilizando de Internet

Marcar

Cancelar

2. Si no se ve como la foto, tócalo una vez para encender el audio.
  3. Incrementar o disminuir el volumen usando los botones de su dispositivo.
  4. Usa audífonos.
  5. Intenta usar la función '[marcar](#)' descrita anteriormente.
  6. Reiniciar su dispositivo.
  7. Reinstalar la aplicación Zoom.
- v. Probando el micrófono
1. Asegúrese que no ha silenciado su micrófono. Si el botón del micrófono se ve como la foto debajo, tócalo una vez para activar el micrófono.

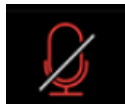

2. Usar audífonos con micrófono.
3. Asegúrese que el audio ha unido a la reunión. Si ve la foto debajo, tócalo una vez y elegir 'marcar utilizando de internet.'

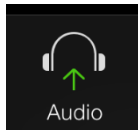

Para escuchar a los demás  
, entre al audio

Marcar utilizando de Internet

Marcar

Cancelar

4. Asegúrese que Zoom tiene permisión usar el micrófono.
  - a. Vaya a Ajustes > Privacidad > Micrófono y asegúrese que ZOOM tiene permisión para usarlo.

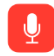

Micrófono

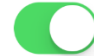

5. Cerrar otras aplicaciones usando el micrófono.
6. Usar la función '[marcar](#)' descrita anteriormente.
7. Si todavía este silenciado, es posible el anfitrión le ha silenciado.
8. Reiniciar Zoom.

f. Android

NOTA: Antes de unirse la reunión, la aplicación de Zoom debe descargarse. Consulte la sección '[descargar Zoom](#)' para más información.

i. Unirse a una reunión

1. A través de email

- a. Recibirá un email con el enlace de la reunión. Haga clic en el enlace y Zoom abrirá.

Unirse a la reunión Zoom

<https://pdx.zoom.us/j/465348901?pwd=S1E3b0MveG9hMWFKS3ZSNGwydEJWUT09>

- b. Zoom abrirá y empezará el videochat.
- c. Se le pedirá unir su audio y le dará unas opciones.

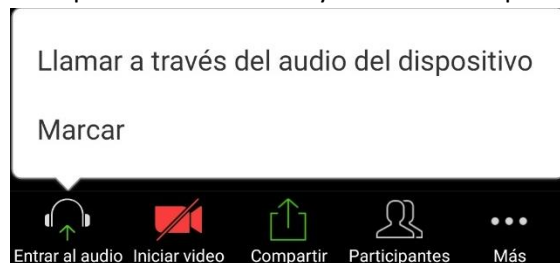

i. Llamar a través del audio del dispositivo

1. Esto le deja usar el micrófono y altavoz de su dispositivo para conectarse a la reunión.

ii. Marcar

1. Para usar esto, necesitará dar permisión a Zoom hacer llamadas. Elige 'permitir.'

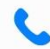

¿Permitir que Zoom haga y administre las llamadas telefónicas?

Permitir

Rechazar

2. Una página nueva aparecerá y se le pedirá elegir cual número de teléfono le gustaría llamar.

< Regresar
Argentina ▾

SELECCIONAR UN NÚMERO PARA MARCAR

+54 341 512 2188
📞

+54 343 414 5986
📞

+54 112 040 0447
📞

La ID de la reunión y la ID del participante se marcarán automáticamente. Puede ignorar los mensajes que le piden estos números.

Si utiliza otro dispositivo para marcar, también puede necesitar la siguiente información

ID de la reunión
646 546 289

ID del participante
49

3. Cuando hayas llamado se le pedirá entrar el ID de la reunión y la ID del participante seguido por el signo '#.'
4. Si el país o región anterior no es correcto, tóquelo una vez para abrir una página donde puede elegir el país correcto y llamar a los números provistos para ese país.

<
País/región

🔍

A
#

Alemania

A

Argentina

B

Australia

C

Austria

D

Baréin

E

Baréin

F

Baréin

G

Baréin

H

Baréin

I

Baréin

J

Baréin

K

Baréin

L

Baréin

M

5. Su reunión empezará.

2. A través de la pantalla de inicio
  - a. Inicia sesión en Zoom.
  - b. Elige 'entrar.'



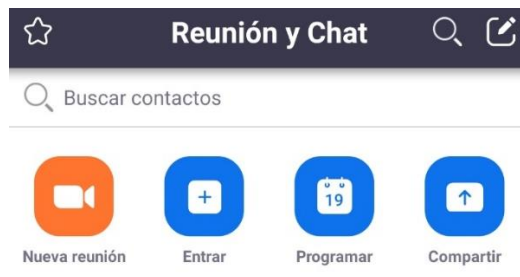

- c. Se le pedirá entrar el ID de reunión, un código de 9, 10, o 11 dígitos se encuentra en el email de invitación. Entrar su nombre para que los demás saben quién es usted. Haga clic en 'entrar a la reunión.'

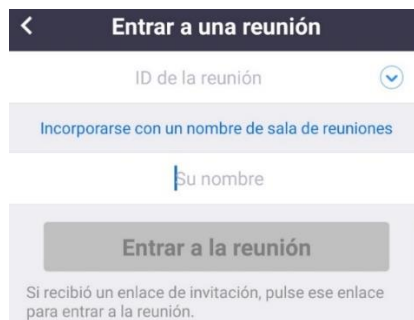

- d. Se le pedirá entrar la contraseña de la reunión que se encuentra en el email de invitación. Haga clic en 'ok.'

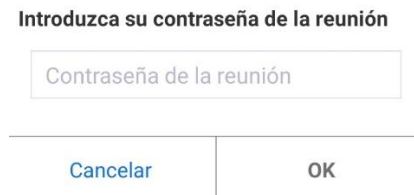

- e. Su reunión empezará.

ii. Empezar una reunión

1. Abrir la aplicación Zoom.

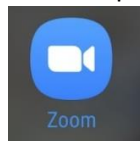

2. Inicia sesión en Zoom.  
3. Elige 'nueva reunión.'

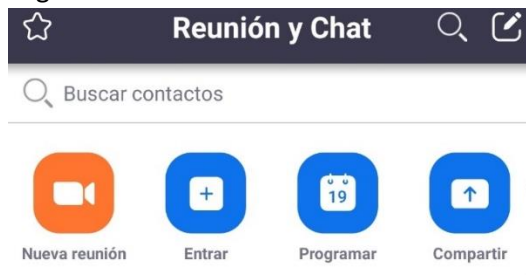

4. Se abrirá una nueva pantalla y le pedirá si quiere empezar el video con su video encendido o usar su ID personal de la reunión (una ID de reunión siempre asignada a usted). Elige que le gustaría y haga clic en 'iniciar una reunión.'

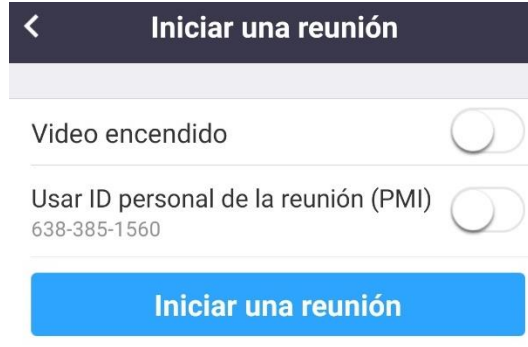

5. Su reunión empezará.

### iii. Invitar

1. Inicia sesión en Zoom.
2. Elige 'nueva reunión.'

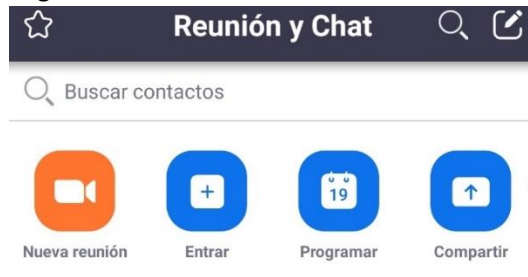

3. Haga clic en el botón 'participantes' en la parte inferior de la pantalla. La lista de los participantes abrirá.

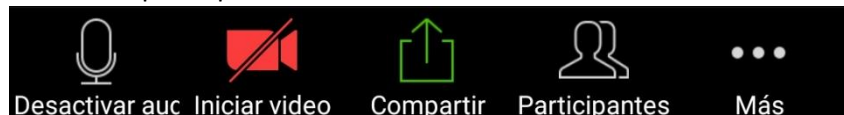

4. Haga clic en 'invitar' en la parte inferior de la pantalla de participantes.

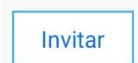

5. Las opciones de invitar aparecerán.

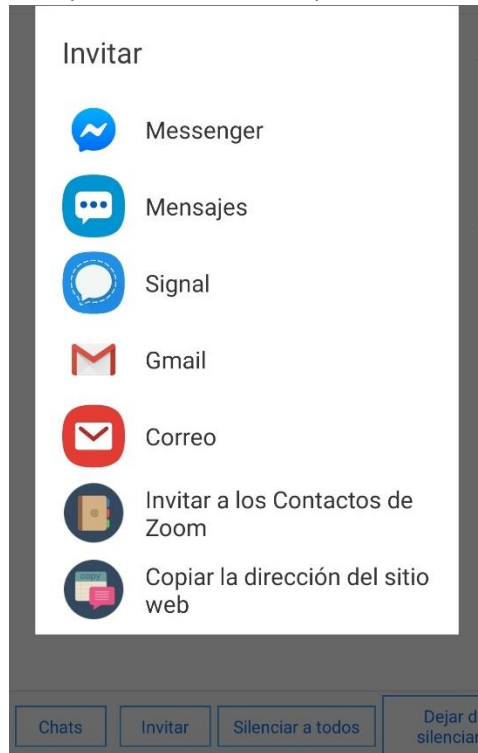

6. Messenger

- a. Esto abrirá Facebook Messenger para enviar la invitación a la reunión pre escrita a otras personas.

7. Mensajes, Signal

- a. Esto abrirá sus mensajes de texto para enviar la invitación a la reunión pre escrita a otras personas.

8. Gmail, Correo

- a. Esto abrirá su cuenta de email para enviar el email de invitación a la reunión pre escrita a otras personas.

9. Invitar a los contactos de Zoom

- a. Use esto si el e-mail de su cliente ya se ha agregado a sus contactos.
  - i. Consulte la sección de [‘contactos’](#) para más información.
- b. Seleccione el nombre de sus clientes haciendo clic en su contacto o buscando su nombre.
- c. Haga clic en ‘invitar’ en la esquina inferior derecha.

10. Copiar la dirección de la página web

- a. Esto copiará el enlace a su portapapeles y puede pegarlo en cualquier lugar para enviarla a las personas que desea invitar.

iv. Probando el audio

1. Asegúrese que el símbolo del audio en la parte superior izquierda se ve como la foto debajo.

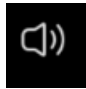

- a. Si no se ve así, tócalo una vez para encender el audio.
2. Incrementar o disminuir el volumen usando los botones de su dispositivo.
3. Usa audífonos.
4. Consulte la sección '[marcar](#)' para Android para entrar al audio por teléfono.
5. Reiniciar su dispositivo.
6. Reinstalar Zoom.
- v. Probando el micrófono
  1. Asegúrese que su micrófono no está silenciado. Si se ve como la foto debajo, tócalo una vez para encenderla.
  2. Asegúrese que el audio de su dispositivo está conectado. Si el símbolo del audio se ve como la foto debajo, tócalo y elige 'marcar a través del audio del dispositivo.'

Entrar al audio

Llamar a través del audio del dispositivo

Marcar
  3. Intenta usar audífonos con micrófono.
  4. Asegúrese que Zoom tiene permisión de usar su micrófono.
    - a. Vaya a Ajustes > Aplicaciones > Zoom > Accesos y Asegúrese que Zoom tiene permisión para usarlo.
  5. Cierre otras aplicaciones usando el micrófono.
  6. Consulte la sección '[marcar](#)' para Android para entrar al audio por teléfono.
  7. Si todavía está silenciado, es posible que el host lo haya silenciado.
  8. Reinstalar Zoom.

## B. Preguntas frecuentes de Zoom

- a. El eco (tomado de [Zoom FAQ: El Eco](#))
  - i. Hay tres razones posibles para el eco
    1. Se está utilizando audio de computadora y teléfono

- a. Puede abandonar el audio de la computadora manualmente en su computadora o teléfono.

- i. Teléfono

1. Haga clic en el botón 'más' y elige 'desconectar audio.'

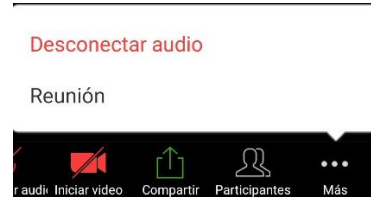

- ii. Computadora

1. Haga clic en el símbolo del micrófono y elige 'dejar el audio de la computadora.'

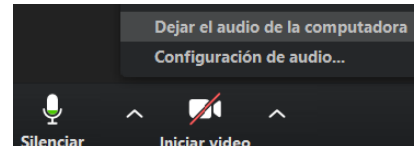

2. Los altavoces de la computadora o el teléfono de los participantes están demasiado cerca los unos de los otros

- a. Si otro participante está demasiado cerca de usted y los dos tienen los altavoces activados, abandone el audio de la conferencia en una de las computadoras o desconecte el teléfono.

3. Varias computadoras con audio activo en la misma sala de conferencias

- a. Si está en una sala de conferencias con varios dispositivos, desconecte el audio de la computadora de los demás dispositivos.

- i. Teléfono

1. Haga clic en el botón 'más' y elige 'desconectar audio.'

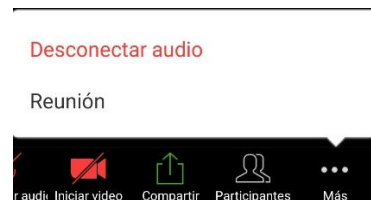

- ii. Computadora

1. Haga clic en el símbolo del micrófono y elige 'dejar el audio de la computadora.'

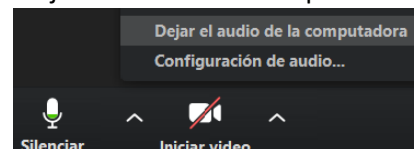

- iii. Cancelar el audio no es suficiente ya que cancela solo el audio del micrófono, pero el altavoz sigue activado.
- ii. Silenciar el altavoz no resolverá el eco porque el altavoz todavía está activo
- iii. Otras sugerencias para el eco
  - 1. Si escuchas eco, significa que hay un dispositivo que está canalizando tu audio
  - 2. Para aislar el asistente, el anfitrión puede
    - a. cancelar el audio de los participantes de a uno por vez.
    - b. reactivar el audio de todos o reactivar el audio de a uno por vez.
    - c. cancelar su propio audio.
  - 3. El eco también puede relacionarse con
    - a. Los altavoces que tiene el volumen demasiado alto (tv, barra de sonido).
    - b. La cancelación del eco ha fallado (problema del dispositivo o de funcionamiento).
    - c. Micrófono de mala calidad.
- b. Entrar al audio por teléfono
  - i. Si el audio de la computadora no funciona después de probarlo, Zoom le proporcionará números de teléfono para que pueda llamar para conectarse a la reunión.
  - ii. Durante una reunión, haga clic en la flecha al lado del símbolo del micrófono en la parte inferior izquierda de la pantalla. Haga clic en 'cambiar a audio del teléfono.'

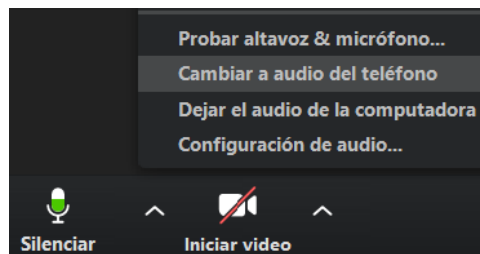

- iii. Una ventana nueva abrirá con los números de teléfono que puede usar para conectarse a la reunión por teléfono.

¿Que opción de audio desea para entrar a la reunión? ×

[Entrar por teléfono](#) [Audio de la computadora - Conectado](#)

 Marcar: +1 408 638 0968  
+1 646 558 8656

ID de la reunión: 788 704 160

ID de el participante: **49**

[Listo](#)

1. Una vez que haya llamado a la reunión, Zoom le pedirá que ingrese la ID de la reunión y la ID del participante, seguido del signo '#.'

#### Referencias

Symon, J. B. (2001). Parent Education for Autism: Issues in Providing Services at a Distance. *Journal of*

*Positive Behavior Interventions*, 3(3), 160. <https://doi->

[org.proxy.lib.pdx.edu/10.1177/109830070100300304](https://doi-org.proxy.lib.pdx.edu/10.1177/109830070100300304)

Zoom Communications, Inc. (2017) *HIPAA Compliance Guide* [PDF] Retrieved from

<https://zoom.us/healthcare>.
