# Supplementary material
Source: publisher figshare collection journal article supplement (https://asha.figshare.com/articles/dataset/_/14044091)
Supplement: Supplementary file 4 [file 1]

# Guía de Conectividad en Telepráctica y Solución de Problemas para Terapistas de Habla y Lenguaje

Usando la Aplicación Zoom

Kimberly Fiddler, M.S. CF-SLP

## Tabla de Contenido

- A. [Sobre Telepráctica](#)
- B. [Sobre la Aplicación Zoom](#)
- C. [Usando Zoom](#)
  - a. Descargar Zoom
    - i. [Computadora de escritorio \(MAC, PC\) y ordenador portátil \(MAC, PC\)](#)
    - ii. [iPhone, iPad](#)
    - iii. [Android](#)
    - iv. [Chromebook](#)
  - b. [Chat](#)
  - c. [Reuniones](#)
    - i. [Integración con el calendario del cliente de escritorio](#)
    - ii. [Programar reuniones](#)
  - d. [Contactos](#)
    - i. Añadir contactos
    - ii. Aceptar contactos
  - e. [Funciones de anfitrión](#)
    - i. [Silenciar](#)
    - ii. [Detener video](#)
    - iii. [Invitar](#)
    - iv. [Participantes](#)
    - v. [Compartir Pantalla](#)
    - vi. [Chatear](#)
    - vii. [Grabar](#)
      - 1. Grabar en el 'cloud'
      - 2. Grabar localmente
      - 3. Configurar grabación automática
    - viii. [Subtítulos](#)
      - 1. Asignar un participante para escribir los subtítulos
      - 2. Escribir los subtítulos usted mismo
      - 3. Usando un servicio de tercero
      - 4. Ingresar subtítulos como participante
      - 5. Subtítulos en grupos pequeños
    - ix. [Grupos Pequeños](#)
      - 1. Crear un grupo pequeño
      - 2. Asignación de participantes a grupos pequeños automáticamente
      - 3. Asignación de participantes a grupos pequeños manualmente
      - 4. Habilidad de grupos pequeños de trabajo para todos los participantes
      - 5. Habilidad de grupos pequeños para grupos
      - 6. Habilidad de grupos pequeños como usuario final
  - x. [Finalizar Reunión](#)
- D. Usando Zoom en dispositivos específicos

- a. [Computadora de escritorio de Windows, Ordenador portátil de Windows, Tableta de Windows](#)
  - i. Unirse a una reunión
    - 1. A través de email
  - ii. Empezar una reunión
  - iii. Invitar
  - iv. Probando el audio
    - 1. Antes de una reunión
    - 2. Durante una reunión
  - v. Probando el micrófono
    - 1. Antes de una reunión
    - 2. Durante una reunión
- b. [Chromebook \(Google\)](#)
  - i. Unirse a una reunión
    - 1. Ingresar
    - 2. Unirse a una reunión
  - ii. Empezar una reunión
  - iii. Invitar
  - iv. Probando el audio
  - v. Probando el micrófono
- c. [Computadora de escritorio de MAC, Ordenador portátil de MAC](#)
  - i. Unirse a una reunión
    - 1. A través de email
    - 2. A través de la pantalla de inicio
  - ii. Empezar una reunión
  - iii. Invitar
  - iv. Probando el audio
    - 1. Antes de una reunión
    - 2. Durante una reunión
  - v. Probando el micrófono
    - 1. Antes de una reunión
    - 2. Durante una reunión
- d. [iPad](#)
  - i. Unirse a una reunión
    - 1. A través de email
    - 2. A través de la pantalla de inicio
  - ii. Empezar una reunión
  - iii. Invitar
  - iv. Probando el audio
  - v. Probando el micrófono
- e. [iPhone](#)
  - i. Unirse a una reunión
    - 1. A través de email

- 2. A través de la pantalla de inicio
        - ii. Empezar una reunión
        - iii. Invitar
        - iv. Probando el audio
        - v. Probando el micrófono
    - f. [Android](#)
      - i. Unirse a una reunión
        - 1. A través de email
        - 2. A través de la pantalla de inicio
      - ii. Empezar una reunión
      - iii. Invitar
      - iv. Probando el audio
      - v. Probando el micrófono
  - E. [Preguntas frecuentes de Zoom](#)
    - a. [El eco](#)
    - b. [Entrar al audio por teléfono](#)
- A. Sobre Telepráctica
- a. Telepractice es el uso de tecnología para conectar a profesionales, como los patólogos del habla y lenguaje (SLP) con clientes que necesitan servicios independientemente de la distancia (cita publicada en inglés y traducida al español) (Symon, 2001).
  - b. El uso de telepráctica en patología de habla y lenguaje está creciendo cada día.
  - c. Telepráctica puede ser una manera rentable y conveniente para ofrecer tratamiento a gente con acceso limitado a servicios de transportación o servicios, como las que viven en zonas rurales o remotas.
- B. Sobre la aplicación Zoom
- a. Zoom es software de videoconferencia seguro y encriptado basado en la red.
    - i. Cumple con HIPAA: “Firmamos el Acuerdo de Asociado Comercial de HIPAA (BAA) para nuestros clientes de atención médica (mínimo \$ 200), lo que significa que somos responsables de mantener la seguridad de su información del paciente y reportar violaciones de seguridad que involucren información de salud personal. No tenemos acceso a información de salud identificable, y protegemos y encriptamos todos los datos de audio, video y uso compartido de pantalla.” (cita publicada en inglés y traducida al español) (Zoom Communications, Inc., 2017).
- C. Usando Zoom
- a. Descargar Zoom

i. Computadora de escritorio (MAC, PC) y ordenador portátil (MAC, PC)

1. Automáticamente

- a. Se le pedirá descargar la aplicación Zoom cuando haga clic en el enlace del email si este invitado a una reunión de Zoom.

Unirse a la reunión Zoom

<https://pdx.zoom.us/j/465348901?pwd=S1E3b0MveG9hMWFKS3ZSNGwydEJWUT09>

ID de reunión: 465 348 901

Contraseña: 408625

Móvil con un toque

+17207072699,,465348901# Estados Unidos (Denver)

+16465588656,,465348901# Estados Unidos (Nueva York)

- b. Una ventana nueva de la red abrirá. Haga clic en 'descargue y ejecute Zoom.'

Si el navegador web no inicia nada, [descargue y ejecute Zoom](#).

- c. Su computadora se le pedirá si desea guarda el archivo en su computadora. Elige 'save file' (guarda el archivo).

Opening Zoom\_7522bc6ec4a73ae3.exe

×

You have chosen to open:

 **Zoom\_7522bc6ec4a73ae3.exe**

which is: Binary File (75.3 KB)

from: <https://launcher.zoom.us>

Would you like to save this file?

Save File

Cancel

- d. Se abrirá una ventana de instalación de Zoom y cuando termine la descarga, se abrirá Zoom.

 Zoom Installer

×

Initialize...

**zoom**

Entrar a una reunión

Ingresar

2. Manualmente

- a. Ir a <https://zoom.us/download>  
b. Elige 'descargar' debajo 'Cliente Zoom para reuniones'

## Cliente Zoom para reuniones

El cliente para el navegador se descargará de manera automática cuando comience o se una a su primera reunión Zoom. También se puede descargar de manera manual aquí.

Descargar

Versión 4.6.2 (14747.1216)

- c. Su computadora se le pedirá si desea guarda el archivo en su computadora. Elige 'save file' (guarda el archivo).

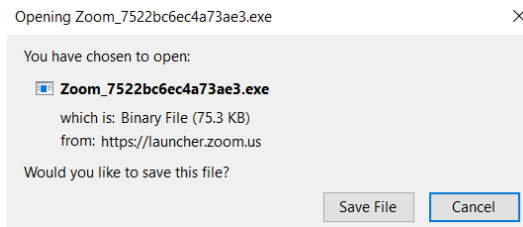

- d. Se abrirá una ventana de instalación de Zoom y cuando termine la descarga, se abrirá Zoom.

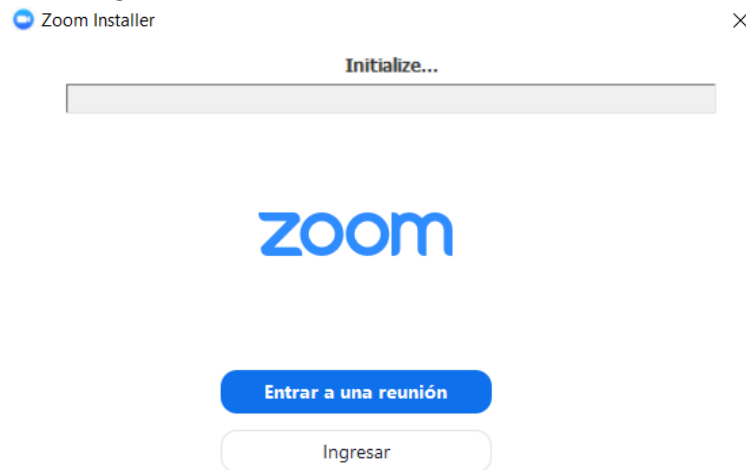

- e. Si Zoom no abre, vaya al explorador de archivos de su computadora. Haga clic en 'descargos,' y 'zoom installer.'

ii. iPhone, iPad

1. Automáticamente

- a. Haga clic en el enlace en el email de invitación.

to me ▾

Unirse a la reunión Zoom

<https://us04web.zoom.us/j/834496480?pwd=Ly9QUiRUQjhBZkorcEtmalp0ZWJhUT09>

- b. Una ventana de la red abrirá. Haga clic en el enlace del 'App Store' en el parte inferior derecho de la pantalla.

Si es su primer uso, descargue la aplicación Zoom de [App Store](#).

- c. El App Store abrirá en la página de descargar Zoom. Haga clic en 'get.'

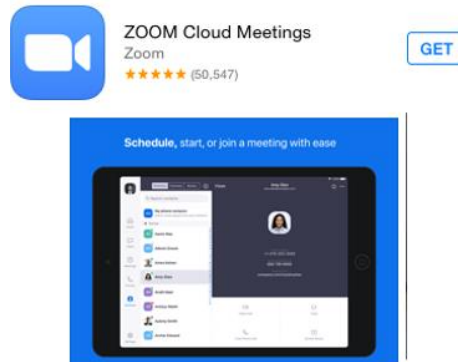

- d. Cuando termine la descarga, haga clic en 'open.'

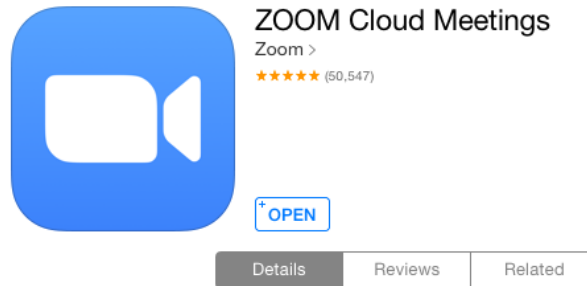

- e. Zoom abrirá y puede registrarse, ingresar, o entrar a una reunión.

## 2. Manualmente

- a. Haga clic en el 'App Store.'

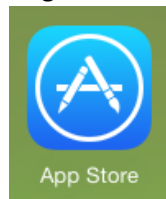

- b. Busca 'Zoom cloud meetings.'

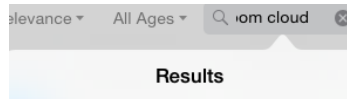

zoom cloud meetings

- c. Haga clic en 'get.'

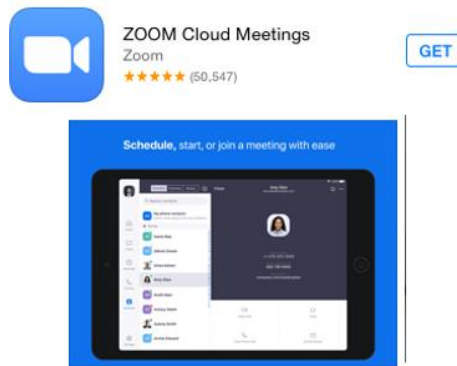

- d. Cuando termine la descarga, haga clic en 'open.'

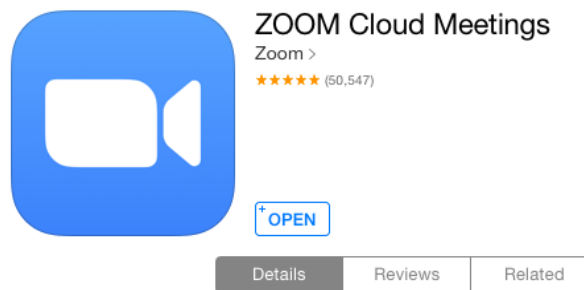

- e. Zoom abrirá y puede registrarse, ingresar, o entrar a una reunión.

### iii. Android

#### 1. Automáticamente

- a. Haga clic en el enlace en el email de invitación.

to me ▾

Unirse a la reunión Zoom

<https://us04web.zoom.us/j/834496480?pwd=L y9QUIRUQjhBZkorcEtmal p0ZWJhUT09>

- b. Una página nueva abrirá para descargar la aplicación. Haga clic en 'Descargar de Google Play.'

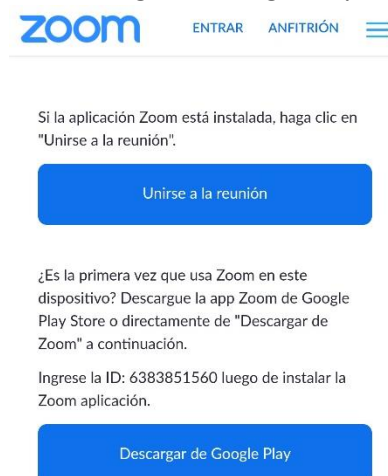

- c. Google Play abrirá. Haga clic en 'instalar.'



← Google Play 🔍 ⋮

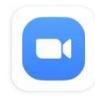

**ZOOM Cloud Meetings**

zoom.us

4.4 ★  
87K reviews

10M+  
Downloads

**E**  
Everyone ⓘ

Instalar

- d. Cuando Zoom este instalado, haga clic en 'abrir.'

← Google Play 🔍 ⋮

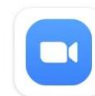

**ZOOM Cloud Meetings**

zoom.us

Desinstalar

Abrir

- e. Zoom abrirá y puede registrarse, ingresar, o entrar a una reunión.

Entrar a una reunión

Registrarse

Ingresar

## 2. Manualmente

- a. Navegue a la aplicación 'Play Store.'

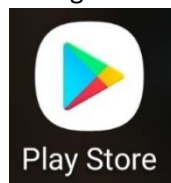

- b. Busca 'Zoom cloud meetings.'

← zoom cloud meetings ✕

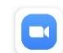

ZOOM Cloud Meetings

- c. Haga clic en 'instalar.'

← Google Play 🔍 ⋮



**ZOOM Cloud Meetings**

zoom.us

4.4 ★  
87K reviews

10M+  
Downloads

**E**  
Everyone

Instalar

- d. Cuando Zoom este instalado, haga clic en 'abrir.'

← Google Play 🔍 ⋮



**ZOOM Cloud Meetings**

zoom.us

Desinstalar

Abrir

- e. Zoom abrirá y puede registrarse, ingresar, o entrar a una reunión.

Entrar a una reunión

Registrarse

Ingresar

#### iv. Chromebook

##### 1. Automáticamente

- a. Haga clic en el enlace de la reunión en el email de invitación.

to me ▾

Unirse a la reunión Zoom

<https://us04web.zoom.us/j/834496480?pwd=Ly9QUiRUQjhBZkorcEtmalp0ZWJhUT09>

- b. Una nueva ventana abrirá y se le pedirá si quiere añadir Zoom a Chrome ('Add Zoom to Chrome'). Elige 'Install from Chrome Web Store' (instalar desde la tienda web de Chrome).

#### Add Zoom to Chrome

Clicking the button below will open a new tab page to guide you to Chrome Web Store.  
Once the new tab page is opened, click "Add to Chrome" button.

 Install from Chrome Web Store

During installation process, do not close this page. You will join the meeting automatically.

- c. Le llevará a la tienda web de Chrome con la página de Zoom ya abierto. Haga clic en 'Add to Chrome' (añadir a Chrome).

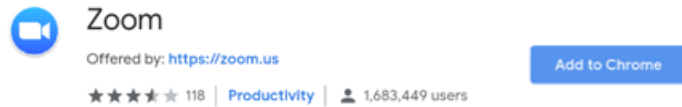

- d. Se le pedirá si desea añadir Zoom a Chrome. Se le explicará los permisos que tiene Zoom. Elige 'Add app' (añadir aplicación).

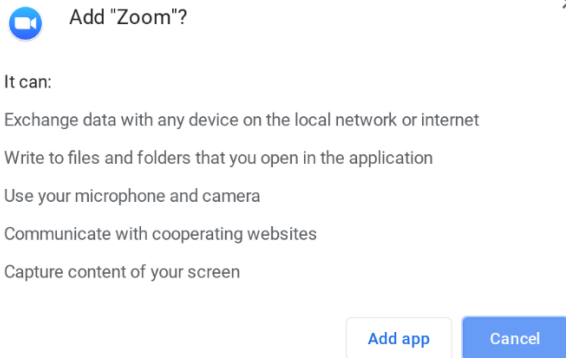

- e. La reunion empezará.

## 2. Manualmente

- a. Navegue a la tienda web de Chrome.  
b. Busca la aplicación Zoom. Haga clic en 'Add to Chrome' (añadir a Chrome).

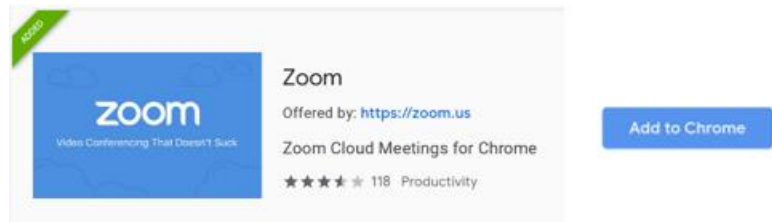

- c. Se le pedirá si desea añadir Zoom a Chrome. Se le explicará los permisos que tiene Zoom. Elige 'Add app' (añadir aplicación).

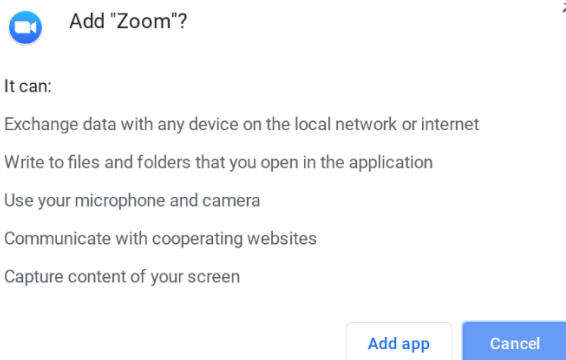

- d. Zoom se puede estar utilizado.

- b. Chat

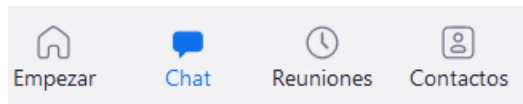

- i. Se puede acceder a la función de chat haciendo clic en el icono de la burbuja de chat en la parte superior de su página de inicio.
- ii. Esta área le permite enviar y recibir mensajes de sus contactos agregados.

c. Reuniones

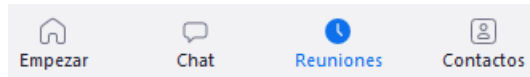

NOTA: También puede programar reuniones por haga clic en 'agendar' desde la pantalla de inicio.

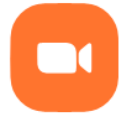

Nueva reunión ▾

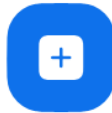

Entrar

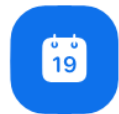

Agendar

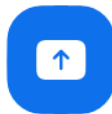

Compartir pantalla

- i. Integración con el calendario del cliente de escritorio (Tomado de [zoom.us](https://zoom.us))
  1. Si le gustaría ver sus reuniones programadas en la página 'reuniones' de Zoom, necesita integrar su calendario y contactos a Zoom. Si no desea que aparezcan las reuniones programadas, no necesita seguir estos pasos.
  2. Inicie sesión a Zoom en línea ([zoom.us](https://zoom.us)).
  3. Navegue a 'perfil' en la parte izquierda de la pantalla.

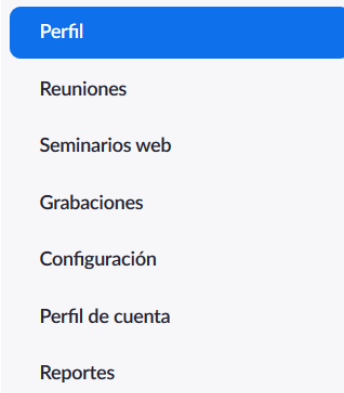

4. Desplazarse hacia abajo a encontrar 'integración del calendario y los contactos.' Haga clic en 'conectarse al servicio de calendario y contactos.'

Integración del calendario y los contactos

Puede integrarse con servicios o aplicaciones de terceros, como Google, Outlook o Exchange, para sincronizar el calendario y los contactos.

Conectarse al servicio de calendario y contactos

5. Se le pedirá elegir cual servicio le gustaría usar, Google, Exchange, o Office 365.

### Seleccione un servicio

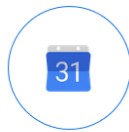

Google

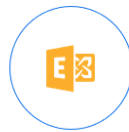

Exchange

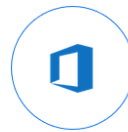

Office 365

a. Google

- i. De vez en cuando haya elegido Google, una ventana abrirá abajo del 'seleccione un servicio.' Asegúrese de que las casillas de la siguiente foto estén marcadas.

- ☒ Permitir que Zoom obtenga el calendario de eventos
- ☒ Permitir que Zoom sincronice los contactos

Siguiente

- ii. Seleccione cual cuenta de email desea usar.
- iii. Google se le pedirá dar permisiones a Zoom para acceder su calendario y contactos. Seleccione 'aceptar' para todas las solicitudes.
- iv. Será redirigido al portal en línea de Zoom para mostrar que sus contactos y calendario están integrados. Asegúrese de que los botones estén habilitados (azul).

Permitir que Zoom obtenga el calendario de eventos

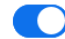

Permitir que Zoom sincronice los contactos

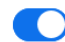

- v. Sus reuniones programadas aparecerán en la página 'reuniones' de la aplicación de Zoom. Para unirse, haga clic en 'iniciar.'

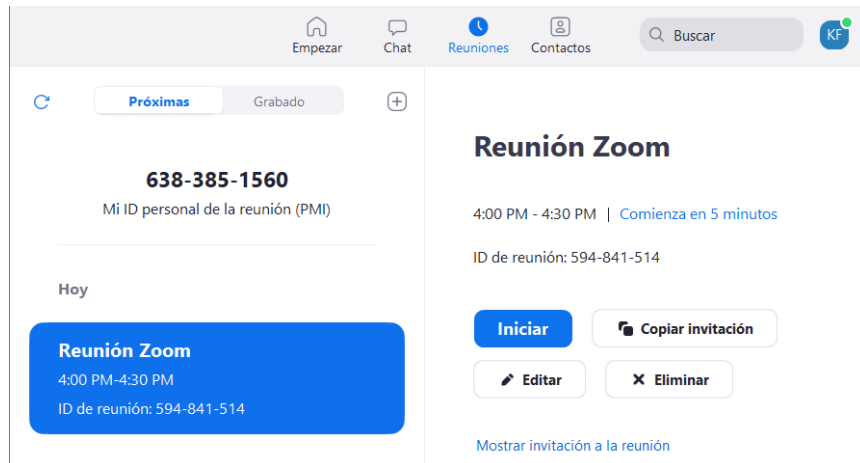

The screenshot shows the Zoom mobile app interface. At the top, there are navigation icons for 'Empezar', 'Chat', 'Reuniones', and 'Contactos', along with a search bar and a user profile icon. Below the navigation bar, there are two tabs: 'Próximas' (selected) and 'Grabado'. A meeting card for 'Reunión Zoom' is displayed, showing the time '4:00 PM - 4:30 PM' and the ID '594-841-514'. To the right of the card, the meeting details are shown: 'Reunión Zoom', '4:00 PM - 4:30 PM | Comienza en 5 minutos', and 'ID de reunión: 594-841-514'. Below the details, there are buttons for 'Iniciar', 'Copiar invitación', 'Editar', and 'Eliminar'. At the bottom, there is a link 'Mostrar invitación a la reunión'.

b. Exchange

- Ingrese su nombre de usuario y contraseña asociados con su cuenta de Exchange.
- Seleccione la versión de intercambio. Si no sabe qué seleccionar, comuníquese con su departamento de TI.
- Ingrese su URL de EWS. Si no sabe qué ingresar, comuníquese con su departamento de TI.

[Meeting Settings](#) > [Add a Calendar Service](#)

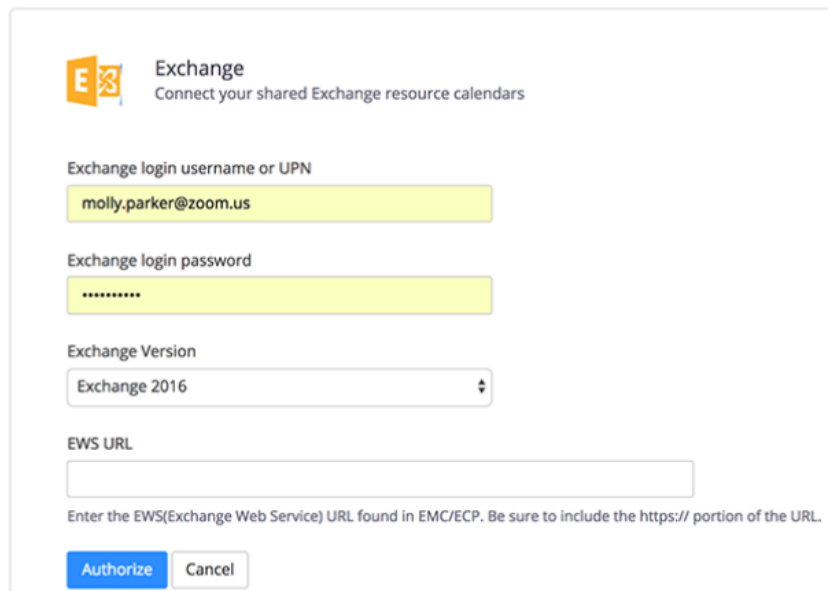

The screenshot shows the 'Exchange' connection form in the Zoom mobile app. The form has the title 'Exchange' and the subtitle 'Connect your shared Exchange resource calendars'. It contains the following fields: 'Exchange login username or UPN' with the value 'molly.parker@zoom.us', 'Exchange login password' with a masked password '\*\*\*\*\*', 'Exchange Version' with a dropdown menu set to 'Exchange 2016', and 'EWS URL' with an empty text box. Below the 'EWS URL' field, there is a note: 'Enter the EWS(Exchange Web Service) URL found in EMC/ECP. Be sure to include the https:// portion of the URL.' At the bottom of the form, there are two buttons: 'Authorize' and 'Cancel'.

- Sus reuniones programadas aparecerán en la pestaña de reuniones en la pantalla de inicio de Zoom. Para

unirse, haga clic en 'iniciar.'

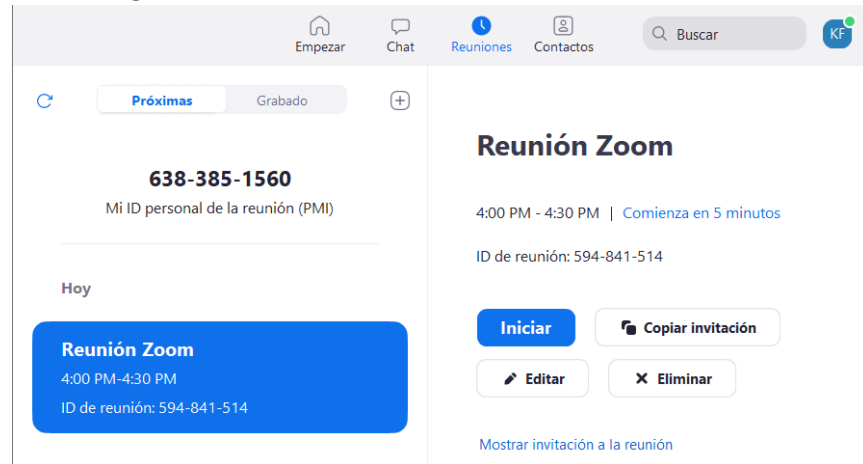

The screenshot shows the Zoom mobile app interface. At the top, there's a navigation bar with icons for 'Empezar', 'Chat', 'Reuniones', and 'Contactos', along with a search bar and a user profile icon. Below this, there's a section for 'Próximas' (Upcoming) meetings. A meeting card is displayed with the phone number '638-385-1560', the text 'Mi ID personal de la reunión (PMI)', and a blue button labeled 'Reunión Zoom' with the time '4:00 PM-4:30 PM' and the meeting ID '594-841-514'. To the right, a sidebar titled 'Reunión Zoom' shows the meeting time '4:00 PM - 4:30 PM', the start time 'Comienza en 5 minutos', the meeting ID '594-841-514', and buttons for 'Iniciar', 'Copiar invitación', 'Editar', and 'Eliminar'. At the bottom of the sidebar, there's a link 'Mostrar invitación a la reunión'.

c. Office 365

- i. Elige un método de autorización. Esto depende de los requisitos de seguridad de su organización. Póngase en contacto con su equipo de TI interno si no está seguro de cuál elegir.
- ii. Ingrese su nombre usuario y contraseña.
- iii. La URL de EWS se completará con la URL de EWS predeterminada para Office 365. Déjelo como predeterminado a menos que su cuenta de Office 365 use una configuración única.

Meeting Settings > Add a Calendar Service

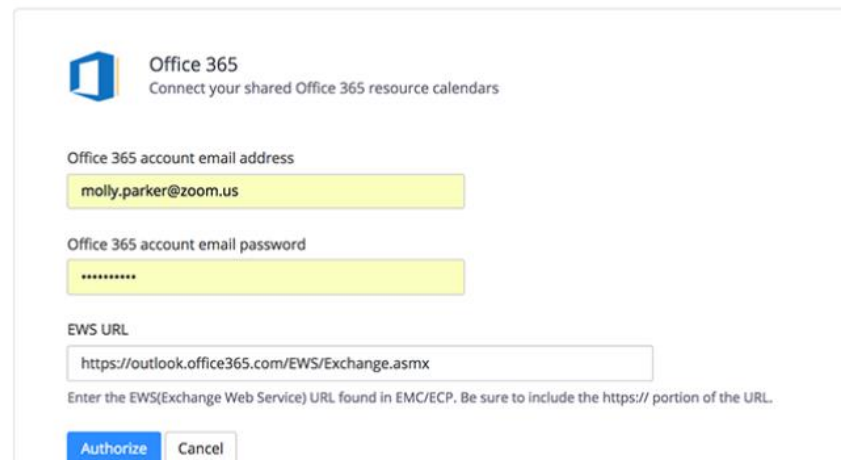

The screenshot shows the 'Office 365' section of the 'Add a Calendar Service' form. It includes the Office 365 logo and the text 'Connect your shared Office 365 resource calendars'. There are three input fields: 'Office 365 account email address' with the value 'molly.parker@zoom.us', 'Office 365 account email password' with masked characters, and 'EWS URL' with the value 'https://outlook.office365.com/EWS/Exchange.asmx'. Below the EWS URL field, there's a note: 'Enter the EWS(Exchange Web Service) URL found in EMC/ECP. Be sure to include the https:// portion of the URL.' At the bottom, there are two buttons: 'Authorize' and 'Cancel'.

- iv. Será redirigido al portal en línea de Zoom para mostrar que sus contactos y calendario están integrados. Asegúrese de que los botones estén habilitados (azul).
- v. Sus reuniones programadas aparecerán en la pestaña de reuniones en la pantalla de inicio de Zoom. Para

unirse, haga clic en 'iniciar.'



## ii. Programar reuniones

1. Programar reuniones en Zoom haciendo clic en el icono 'más' en la página de reuniones. Hay tres opciones para programar.

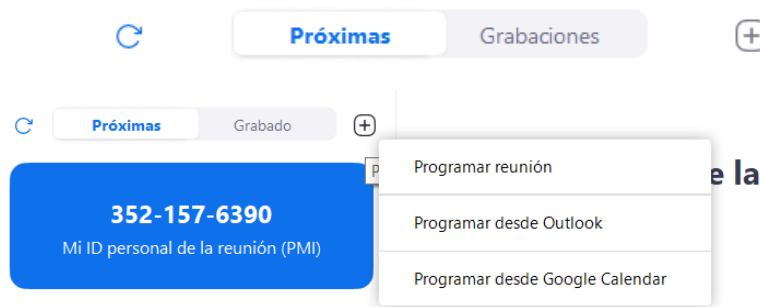

### a. Programar reunión

- i. Una ventana nueva abrirá y se le dará opciones de nombrar la reunión, elegir un tiempo de empezar y finalizar, y elige opciones del audio y video.



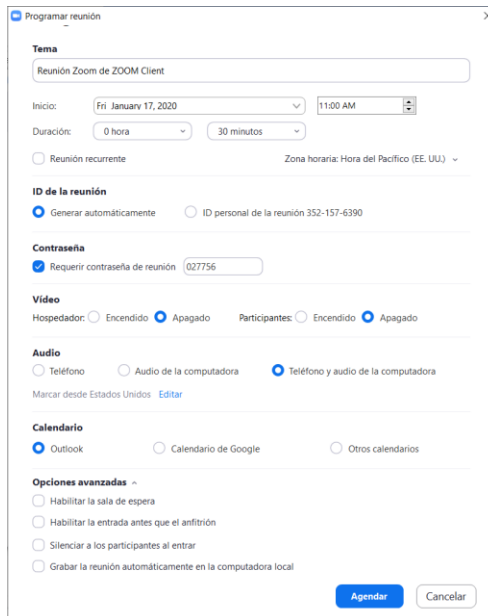

- b. Programar desde Outlook
  - i. Si le gustaría usar esta función, debe descargar el complemento Zoom para Microsoft Outlook de <https://zoom.us/download>

### Complemento Zoom para Microsoft Outlook

El complemento Zoom para Outlook instala un botón en la barra de herramientas de Microsoft Outlook para permitirle comenzar o programar una reunión con un solo clic.

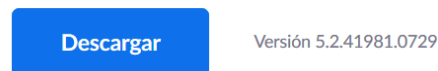

- ii. Una vez descargado, presione el icono más en la pestaña de reuniones de Zoom y seleccione "programar desde Outlook"
  - a. Si no ve la opción "programar desde Outlook", es posible que deba reiniciar su dispositivo.

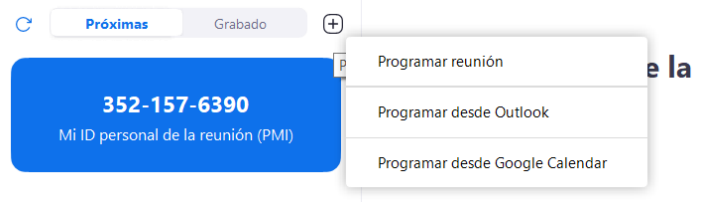

- iii. Esto abrirá Outlook en su computadora y habrá un email con el enlace de la reunión de Zoom.

ⓘ No responses have been received for this meeting.

Send Update

Title: Personal Meeting Room

Required

Optional

Start time: Fri 1/17/2020 10:46 AM ☐ All day ☐ Time zones

End time: Fri 1/17/2020 11:46 AM [Make Recurring](#)

Location: <https://pdx.zoom.us/j/7042402433> [Room Finder](#)

USER is inviting you to a scheduled Zoom meeting.

Topic: Personal Meeting Room

Join Zoom Meeting  
<https://pdx.zoom.us/j/7042402433>

Meeting ID: 704 240 2433

One tap mobile  
+16699009128,,7042402433# US (San Jose)  
+16465588656,,7042402433# US (New York)

- iv. Tendrá opciones de elegir un tiempo de empezar y finalizar.
- c. Programar desde Google Calendar
  - i. Google abrirá y se le pedirá dar acceso a Zoom. Elige 'aceptar.'
  - ii. Esto abrirá Google Calendar en su computadora y habrá un evento de calendario con el enlace de la reunión de Zoom. Desde aquí, puede invitar a otras personas.

× ZOOM Meeting [Save](#) [More actions](#)

Jan 17, 2020 10:48am to 10:48am Jan 17, 2020 (GMT-08:00) Pacific Time - Los Angeles Time zone

☐ All day Does not repeat

Event Details Find a Time

<https://pdx.zoom.us/j/7042402433>

Add conferencing

Notification 10 minutes X

Add notification

Busy Default visibility ⓘ

USER le está invitando a una reunión de Zoom programada.

Únase a la reunión Zoom  
<https://pdx.zoom.us/j/7042402433>

ID de reunión: 704 240 2433

Móvil con un toque  
+16699009128,,7042402433# Estados Unidos de América (San José)  
+16465588656,,7042402433# Estados Unidos de América (Nueva York)

Guests Rooms

Add guests

Guest permissions

- ☐ Modify event
- ☒ Invite others
- ☒ See guest list

d. Contactos

NOTA: De Chromebook, no puede añadir contactos nuevos. solo puede ver sus contactos y si están en línea o no.

- i. Añadir contactos
  1. Navegue a la página de contactos desde la pantalla de inicio en Zoom.
  2. Elige el botón 'más' y elige 'añadir contacto.'

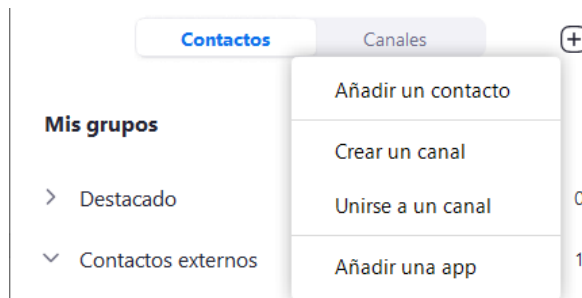

3. Se le pedirá entrar el email de la persona que desea invitar como contacto.

#### Añadir un contacto

Introduzca dirección de correo electrónico

[Copiar invitación](#) [Añadir contacto](#) [Cancelar](#)

4. Se agregarán como contacto una vez que acepten.
- ii. Aceptar una invitación de contacto
    1. Cuando ingrese a Zoom, habrá una notificación encima de 'chat.'

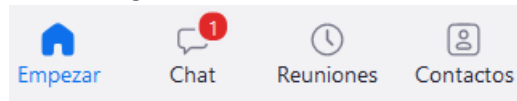

2. Haga clic en esto y la página de 'chat' abrirá. Verá una 'notificación del sistema,' haga clic en esto.

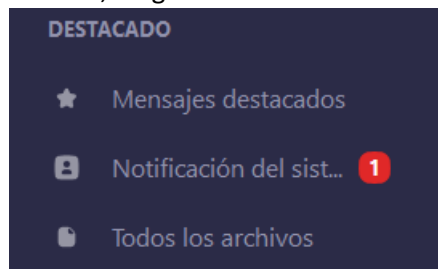

3. Se le mostrará quien le envió una invitación y se le dará la opción de aceptar o declinar.

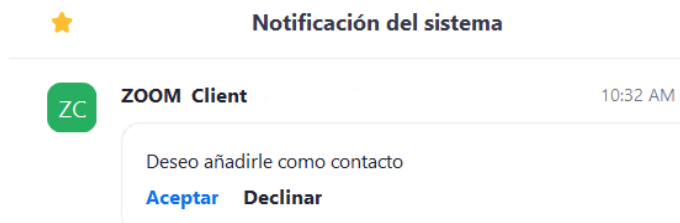

#### e. Funciones de anfitrión

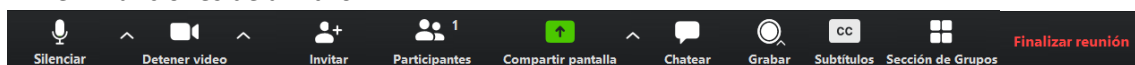

i. Silenciar

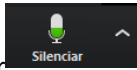

1. Silencia su propio audio para que otros no puedan escucharte.

ii. Detener video

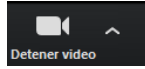

1. Detenga el video que te muestra a la reunión

iii. Invitar

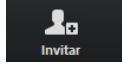

1. Invitar otros participantes a la reunión
2. Consulte la sección 'invitar' de su [dispositivo específico](#) para obtener más detalles.

iv. Participantes

1. Esto abrirá el panel de los participantes al lado derecho del video.

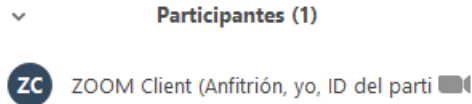

Silenciar a todos

Activar todos

Más ▾

2. Aquí puede silenciar o activar el micrófono de todos los participantes.
3. Con el botón 'más,' puede silenciar todos al entrar la reunión, permite que participantes reactiven su propio micrófono, permite que los participantes cambien su nombre, reproduce la timbre al entrar y salir la reunión, y bloquea la reunión.

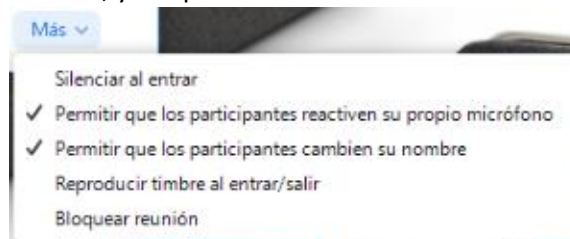

- a. Bloquear la reunión prevenir otras personas de entrar la reunión.

v. Compartir pantalla

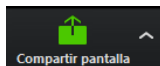

1. Compartir pantalla actual
  - a. Haga clic en 'pantalla' para compartir todo lo que ve actualmente menos la reunión de Zoom.

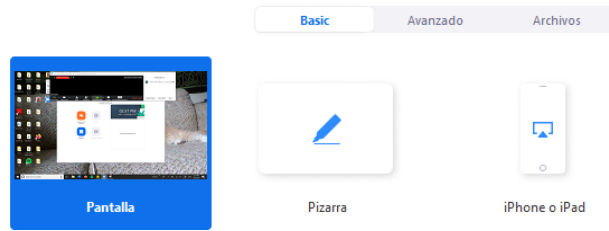

- b. Puede elegir 'compartir sonido de la computadora' y 'optimizar clip de video para pantalla completa' en la parte inferior de la ventana para permitir los demás oír los sonidos de su computadora y para hacer la compartir pantalla lo mejor para videos.

☐ Compartir sonido de la computadora ☐ Optimizar clip de video para pantalla completa

- c. Para acceder las funciones, haga clic en 'anotar.' Consulte la siguiente sección '[anotar/pizarra](#)' para más información.

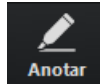

## 2. Pizarra

- a. Haga clic en 'pizarra' para abrir un documento en blanco que puede editar para que los demás vean en tiempo real.

Seleccionar la ventana o la aplicación que usted desea compartir

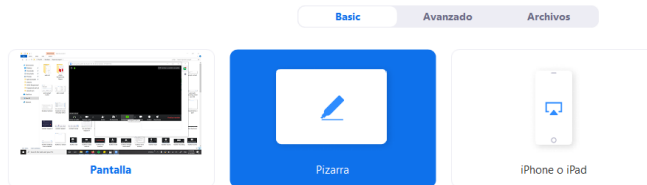

- b. Para acceder las funciones, haga clic en 'anotar.' Consulte la siguiente sección '[anotar/pizarra](#)' para más información.

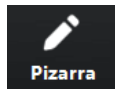

## 3. Funciones de compartir pantalla

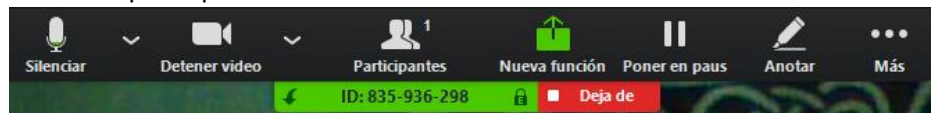

- Silenciar
  - Silenciar su mismo para que los otros no lo oigan.
- Detener video
  - Detener el video para que los otros no puedan ver el video.
- Participantes
  - Abrir la pantalla de los participantes.
- Nueva función
  - Compartir algo nuevo con los otros.

- e. Poner en paus
  - i. Pausa compartir pantalla.
- f. Anotar/pizarra

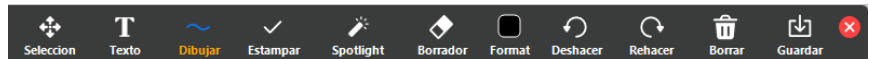

- i. Selección

- a. Esto le permite seleccionar anotaciones (texto, sellos, etc.) agregadas al recurso compartido de pantalla para que pueda moverlas por la pantalla y colocarlas en una nueva área.

- ii. Texto

- a. Poner texto en lo que está compartiendo.

- iii. Dibujar

- a. Dibujar en su pantalla para que los demás lo vean.

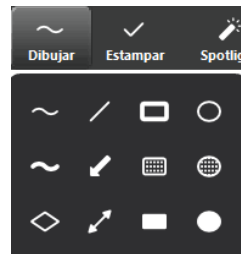

- iv. Estampar

- a. Poner un sello en la pantalla para llevar atención a una cosa en la pantalla.

- v. Spotlight

- a. Usa el spotlight para 2 cosas:

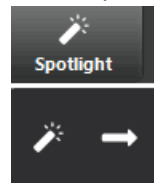

- a. Puede usar una luz roja para que los otros puedan ver dónde está su ratón en la pantalla.

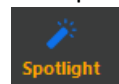

- b. Puede usar flecha para poner una flecha en la pantalla.

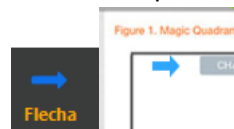

vi. Borrador

- a. Borrar cosas (dibujos, texto, otras cosas) de la pantalla.

vii. Format

- a. Seleccione color, grosor de línea, estilo de texto (negrita, cursiva) y tamaño de fuente para dibujo, texto, etc.

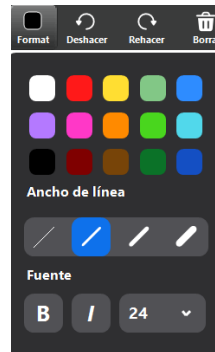

viii. Deshacer

- a. Deshacer la última acción.

ix. Rehacer

- a. Rehacer una acción deshecha.

x. Borrar

- a. Borrar todos los dibujos, los dibujos suyos, o los dibujos del espectador.

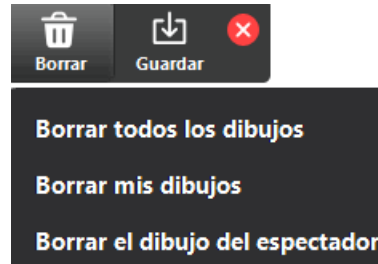

xi. Guardar

- a. Guardar la pantalla actual con todos los dibujos, textos, etc.

xii. Más

- a. Esto abrirá una lista de funciones generales. Consulte la sección anterior para obtener más información sobre [chatear](#), [invitar](#), [grabar](#), etc.

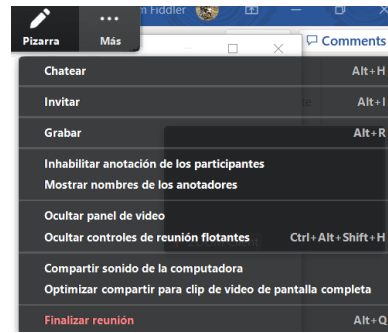

#### vi. Chatear

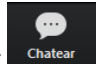

1. Esto abre una ventana lateral con un chat grupal.

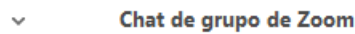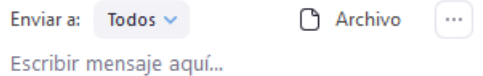

2. Puede enviar un mensaje a todos los participantes del grupo o a una persona específica.
3. Si hace clic en los tres puntos en la parte inferior derecha, hay opciones para administrar la accesibilidad del chat de los participantes.

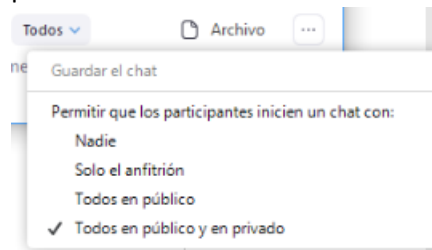

- a. Aquí puede permitir a los participantes chatear solo con el anfitrión, todos públicamente, todos públicamente o en privado, o deshabilitar el chat.

#### vii. Grabar

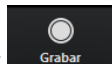

1. Grabar en la nube
  - a. Haga clic en el botón 'grabar.'
  - b. Elige 'grabar en la nube.'



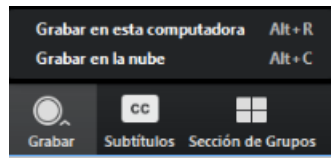

- c. Puede pausar o parar en cualquier momento.
  - d. Cuando pare, recibirá un e-mail con el enlace a su grabación o puede accederla en línea desde su cuenta.
2. Grabar en esta computadora (grabación local)
    - a. Esta opción guarda su grabación a su computadora (grabación local)
    - b. Habilitar grabar en su computadora en las configuraciones de la cuenta.
      - i. Ingresar a su cuenta se Zoom en línea.
      - ii. Navega a la pestaña de 'configuración.'

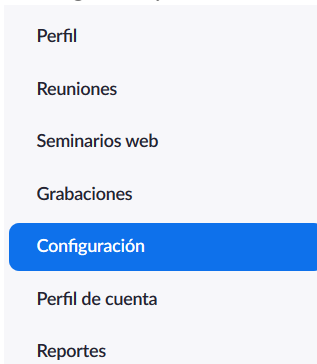

- iii. Navegue a la pestaña de 'grabación.'

Reunión **Grabación** Teléfono

- iv. Asegúrese que 'grabación local' está habilitada.

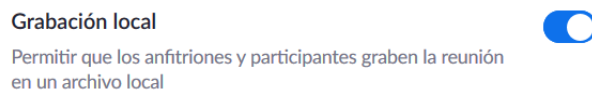

- c. Elegir la ubicación del archivo para grabaciones locales
  - i. Navegue a la pestaña de 'grabando' en las configuraciones de la cuenta.

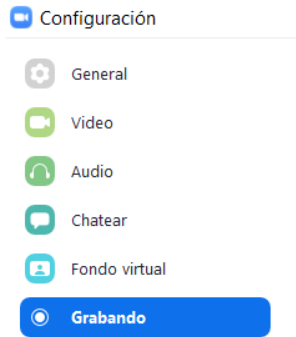

- ii. Aquí, puede elegir la ubicación para guardar el archivo en su computadora

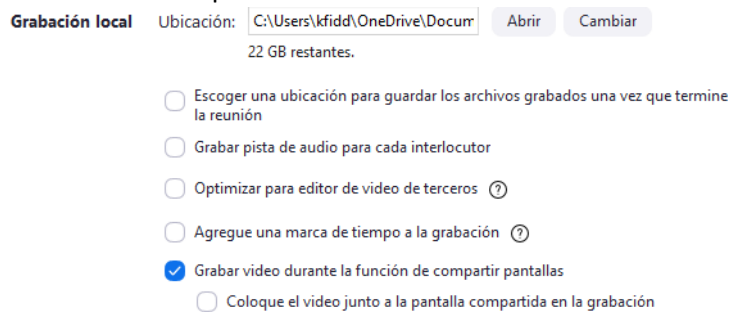

- iii. Puede elegir la ubicación para guardar el archivo cuando termine la reunión, grabar pista de audio para cada interlocutor, optimizar para editor de video, agregar una marca de tiempo, y grabar durante compartir pantalla.

3. Configurar grabación automática
- Vaya a zoom.us e ingrese a su cuenta.
  - Haga clic en 'configuración' en la parte izquierda de la página.

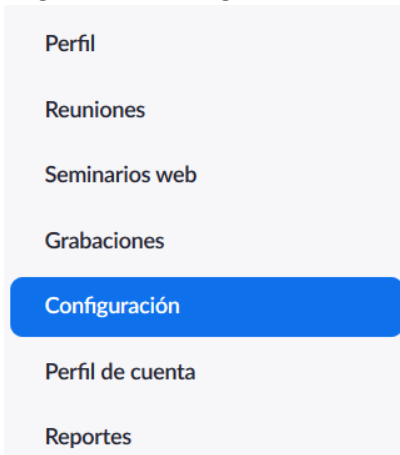

- c. Haga clic en 'grabación' en la parte superior de la página.

Reunión **Grabación** Teléfono

- d. Desplazarse hacia abajo para encontrar 'grabación automática.'
  - i. Asegúrese de que esté habilitado buscando el indicador azul. Si es gris, haga clic en él para habilitarlo.

**Grabación automática**

Grabar reuniones automáticamente cuando comienzan

☒ Grabar en la computadora local

☐ Grabar en la nube

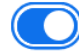

- ii. Escoge si quiere grabar en su computadora local o en la nube.

viii. Subtítulos

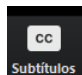

1. Asignar a un participante para escribir los subtítulos
  - a. Elegir 'asignar a un participante para escribir' si alguien en la reunión los escribirá.

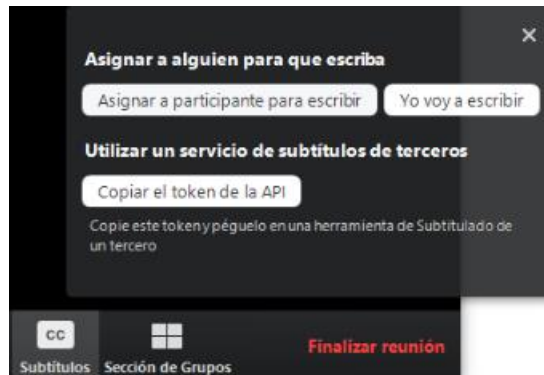

- b. Esto abrirá la ventana de los participantes.
  - c. Encuentra el participante que le asigna y elige 'más,' luego 'asignar a escribir subtítulos'
2. Escribir los subtítulos su mismo
  - a. Elegir 'yo voy a escribir'

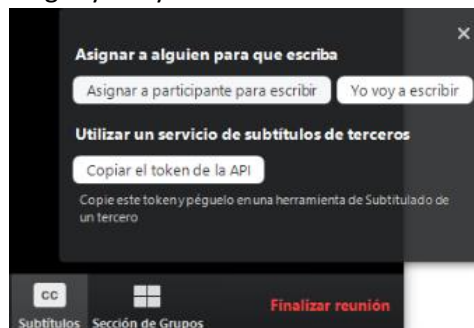

- b. Esto abrirá la ventana de subtítulos

Subtítulos

Utilizar un servicio de subtítulos de terceros

Escriba aquí, presione la tecla de Entrada para empezar a transmitir

- c. Escribir los subtítulos y presione la tecla de entrada para transmitir los subtítulos

### 3. Usando un servicio de tercero

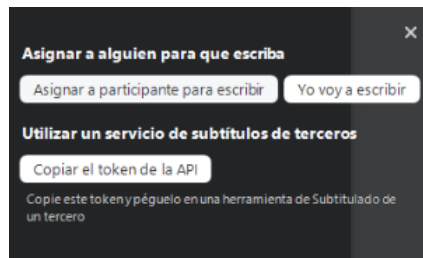

- a. Elegir 'copiar el token de la API'
- b. Esto copiará el enlace para que puedas darlo al servicio que usa.

### 4. Escribiendo subtítulos como participante

- a. Cuando este elegido por escribir subtítulos, una notificación aparecerá.
- b. Haga clic en el cuadro de 'subtítulos'
- c. Esto abrirá la pestaña de subtítulos donde escribe los subtítulos. Presione la tecla de entrada para transmitir los subtítulos.

### 5. Subtítulos en grupos pequeños

- a. Zoom recomienda usar un servicio de tercero para subtítulos en grupos pequeños
- b. Para asignar un participante a escribir subtítulos en un grupo pequeño, asígnelo antes de comenzar grupos pequeños.
  - i. NOTA: solo se puede asignar uno participante para escribir subtítulos, lo que significa que solo una sala de grupo puede tener subtítulos.
- c. El participante seguirá los mismos pasos anteriores (escribir los subtítulos como participantes) para escribir los subtítulos.

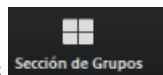

### ix. Grupos pequeños

1. Crear los grupos

- a. Este le permite dividir su reunión en hasta 50 reuniones separadas.
  - b. Cada reunión puede tener hasta 200 participantes.
  - c. Los participantes tendrán capacidades de audio, video y uso compartido de pantalla
  - d. Si graba, solo se grabará la reunión principal.  
(independientemente de en qué habitación se encuentre el anfitrión). Si graba localmente, la grabación será de la sala en la que se encuentra el participante. Varios participantes pueden grabar localmente.
2. Asignar participantes automáticamente
- a. Haga clic en el botón 'sección de grupos.'

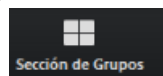

- b. Elige el número de habitaciones y número de participantes en cada habitación.

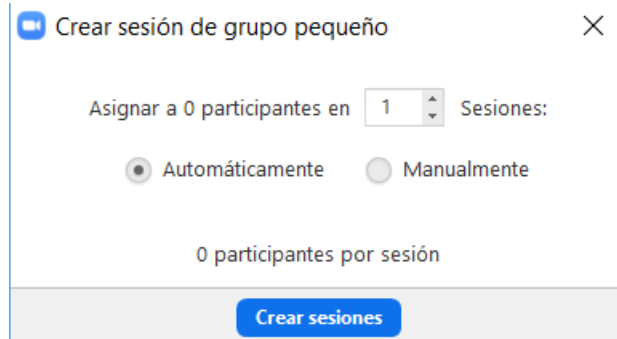

Crear sesión de grupo pequeño

Asignar a 0 participantes en 1 Sesiones:

☒ Automáticamente ☐ Manualmente

0 participantes por sesión

Crear sesiones

- c. Elige 'crear sesiones'
3. Asignar participantes manualmente
- a. Haga clic en el botón 'sección de grupos.'

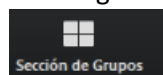

- b. Aquí, puede asignar participantes a habitaciones específicos, renombrar la habitación, y eliminar habitaciones.

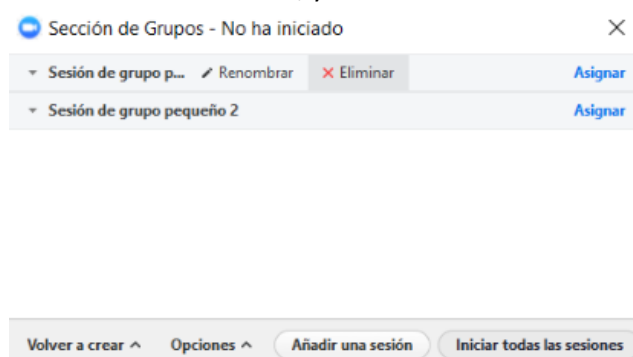

Sección de Grupos - No ha iniciado

|                             |             |            |         |
|-----------------------------|-------------|------------|---------|
| ▼ Sesión de grupo p...      | ✎ Renombrar | ✖ Eliminar | Asignar |
| ▼ Sesión de grupo pequeño 2 |             |            | Asignar |

Volver a crear ^ Opciones ^ Añadir una sesión Iniciar todas las sesiones

- c. Para renombrar o eliminar habitaciones, desplace el cursor sobre la habitación que desea editar y aparecerán las opciones.

4. Pestaña de opciones

- a. Aquí puede mover a los participantes a las salas automáticamente, permitirles regresar a la sesión principal en cualquier momento, asignar una cantidad de tiempo establecida para las salas de grupo y tener una cuenta regresiva después de cerrar una sala de grupo.

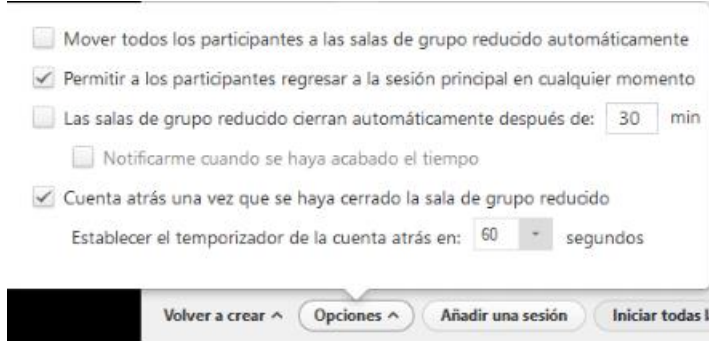

5. Habilitar grupos pequeños para todos los participantes

- a. Inicie sesión en su cuenta de Zoom en línea como administrador con el privilegio de editar la configuración de las cuentas.
- b. Navegue a 'configuración,' luego 'en la reunión (avanzada).' Asegúrese de que esté habilitado como la foto de abajo.

Sala para grupos

Permitir que el anfitrión divida los participantes en salas separadas más pequeñas

- ☒ Permitir al anfitrión que asigne participantes a las salas para grupos pequeños al programar

- i. Haga clic en el cuadro en la parte inferior para permitir que el anfitrión de la reunión asigne previamente a los participantes a reuniones de grupos pequeños.

6. Habilitar grupos pequeños para grupos

- a. Inicie sesión en su cuenta de Zoom en línea como administrador con el privilegio de editar la configuración de las cuentas.
- b. Haga clic en administración de usuarios, luego en administración de grupos.
- c. Vaya a la pestaña de reuniones, luego seleccione la sala de reuniones para verificar que esté habilitada.

NOTA: Si está atenuado, se ha bloqueado en el nivel de la cuenta y debe cambiarse en ese nivel.

7. Habilitación de salas de trabajo como usuario final

- a. Inicie sesión en su cuenta Zoom en línea.
- b. Si es administrador, haga clic en 'administración de la cuenta' y luego en 'configuración de la cuenta.'
- c. Si es miembro de la cuenta, haga clic en 'configuración.'

- d. En la pestaña de la reunión, seleccione la sala de reuniones para verificar que esté habilitada.

NOTA: si la opción está atenuada, significa que, a nivel de grupo o cuenta, se ha bloqueado. Póngase en contacto con su administrador de Zoom.

x. Finalizar reunión

1. Haga clic en esto botón cuando desea terminar la reunión. Si Ud. es el anfitrión, tiene la opción de 'terminar la reunión para todos,' o 'salir de la reunión.' Si Ud. es un usuario, solo puede 'salir de la reunión.'

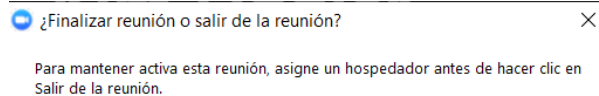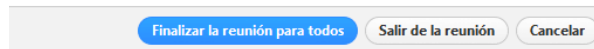

- a. 'Salir de la reunión' significa que los demás todavía puede estar en la reunión, sin usted.
- b. 'Finalizar la reunión' significa que la reunión termina para todos los participantes.

D. Conectar a Zoom

- a. Computadora de escritorio de Windows, Ordenador portátil de Windows, Tableta de Windows

NOTA: Antes de unirse la reunión, la aplicación de Zoom debe descargarse. Consulte la sección '[descargar Zoom](#)' para más información.

i. Unirse a una reunión

1. A través de email

- a. Recibirá un email con el enlace de la reunión. Haga clic en el enlace y Zoom abrirá.

to me ▾

Unirse a la reunión Zoom

<https://us04web.zoom.us/j/834496480?pwd=Ly9QUiRUQjhBZkorcEtmalp0ZWJhUT09>

- b. Zoom abrirá y puede 'ingresar' o 'entrar a una reunión.'



- c. Ingresar/ Unirse desde pantalla de inicio

- i. Se le pedirá entrar su email y contraseña.

## Ingresar Iniciar sesión de manera gratu.

Introducir el correo electrónico

Introducir la nueva ¿Se le ha olvidado?

- ii. Elige 'entrar.'

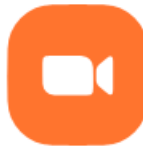

Nueva reunión ▾

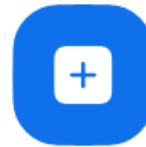

Entrar

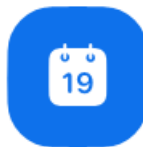

Agendar

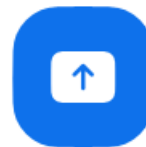

Compartir pantalla

- iii. Se le pedirá entrar el ID de reunión, un número único de 9, 10 u 11 dígitos que se encuentra en el email de invitación. También puede entrar un nombre para su mismo para que los otros sepan quien es.

 Zoom

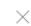

## Unirse a una reunión

Introducir ID de reunión o nombre de ví... ▾

Introducir el nombre

☐ Conectar Sin Audio

☐ Conectar Sin Vídeo

Entrar

Cancelar

- iv. Se le pedirá entrar la contraseña de la reunión, un numero de 6 dígitos, que también se encuentra en el email de invitación.



Zoom

✕

**Introduzca la contraseña de la reunión**

- v. La reunión empezará, y se le pedirá que quiere usar para su audio. Elige 'entrar al audio por computadora.'

¿Que opción de audio desea para entrar a la reunión?

✕

 Entrar por teléfono Audio de la computadora**Entrar al audio por computadora**[Probar el audio de la computadora](#)☐ Seleccionar automáticamente el audio de la computadora al entrar a una reunión**d. Entrar a una reunión sin ingresar**

- i. Esta opción es lo mismo de la opción arriba, aunque no tiene que entrar su email y contraseña. Por favor, consulte la sección anterior '[unirse a una reunión](#)' para las instrucciones de como unirse a una reunión.

**ii. Empezar una reunión**

1. Inicia sesión en Zoom.
2. Elige 'nueva reunión.'

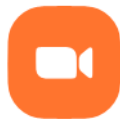

Nueva reunión ▾

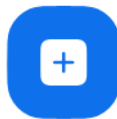

Entrar

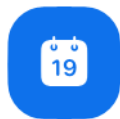

Agendar

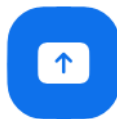

Compartir pantalla

3. Una ventana emergente abrirá para que elijas la opción del audio quiere. Elige 'entrar al audio por computadora.'

¿Que opción de audio desea para entrar a la reunión?

☐ Entrar por teléfono
 ☒ Audio de la computadora

Entrar al audio por computadora

[Probar el audio de la computadora](#)

☐ Seleccionar automáticamente el audio de la computadora al entrar a una reunión

4. Su reunión empezará y puede invitar a otras personas para unirla.
5. Si desea programar una reunión, consulte la sección '[reuniones](#)' para más información.

### iii. Invitar

1. Inicia sesión en Zoom.
2. Elige 'nueva reunión.'

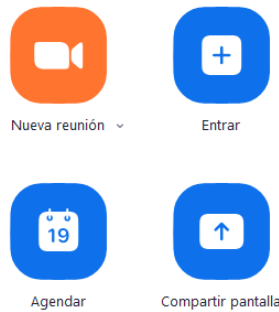

3. En la parte inferior izquierda de la pantalla de reunión, haga clic en 'Invitar' para abrir sus opciones de invitar.

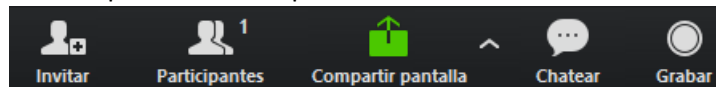

4. Puede invitar a otras personas por email, contactos, copiar la dirección de la página web, o copiar invitación.
5. Invitar por e-mail

☒ Invitar por e-mail
 ☐ Invitar por IM

Elija su servicio de e-mail para enviar la invitación

☒ E-mail predeterminado
 ☐ Gmail
 ☐ Yahoo Mail

Contraseña de la reunión: 711136

- a. Se le pedirá usar 'e-mail predeterminado,' 'Gmail,' o 'Yahoo mail.'
- b. Elige la opción que le gustaría.

- c. Le llevará a su servidor de e-mail para enviar correos electrónicos pre escritos a aquellos a quienes desea invitar.
6. Invitar por IM
  - a. Use esto si el e-mail de su cliente ya se ha agregado a sus contactos.
    - i. Consulte la sección '[contactos](#)' para más información.
  - b. Seleccione el nombre de sus clientes haciendo clic en su contacto o buscando su nombre.
  - c. Haga clic en 'invitar' en la esquina inferior derecha.
7. Copiar la dirección de la página web (URL)

**Copiar URL**

- a. Esto copiará el enlace a su portapapeles y puede pegarlo en cualquier lugar para enviarla a las personas que desea invitar.
8. Copiar invitación

**Copiar invitación**

- a. Esto copiará el email de invitación con el enlace y toda la otra información del email a su portapapeles. Puede pegarla donde desea para invitar a otras personas.

#### iv. Probando el audio

1. Antes de Unirse a una reunión
  - a. Inicia sesión en Zoom.
  - b. Haga clic en 'configuración.'

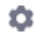

- c. Haga clic en 'audio.'

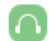

Audio

- d. Encontrará una sección de 'altavoz.' Haga clic en 'altavoz.'

Haga clic en Probar altavoz para asegurarse de que puede oír a los demás

**Altavoz**

Altavoz

Speakers (Realtek High Definition Au... ▼

Nivel de salida:

Volumen:  

- e. Se reproducirán varios tonos desde el altavoz. Si no los escucha, use el menú a la derecha del botón "altavoz" para elegir otro altavoz hasta que escuche los tonos. Asegúrese de que el volumen sea alto y los altavoces no estén silenciados.

- i. Si no funciona, consulte la sección '[entrar al audio por teléfono](#)' para conectar a la reunión.
2. Durante una reunión
  - a. Navegue a los controles en la esquina inferior izquierda de la pantalla de la reunión. Haga clic en la flecha al lado de 'silenciar.'

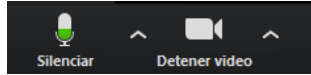

- b. Elige 'probar altavoz & micrófono.'

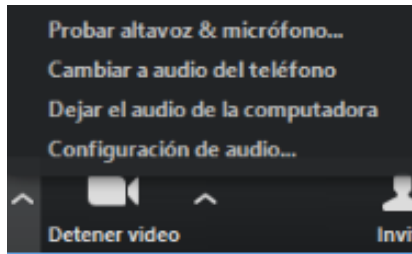

- c. Aparecerá un cuadro emergente y le preguntará si escucha el tono. Haga clic en "sí" o "no". Si no escucha el sonido, intente usar el menú desplegable para cambiar los altavoces hasta que escuche el sonido.

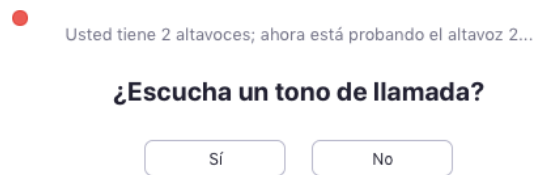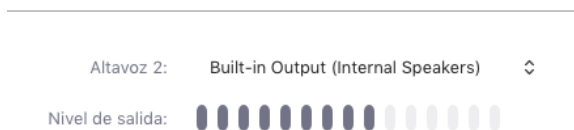

- i. Si no lo escucha, consulte la sección '[entrar al audio por teléfono](#)' para conectar a la reunión.
- v. Probando el micrófono
  1. Antes de Unirse a una reunión
    - a. Iniciar sesión en Zoom.
    - b. Haga clic en 'configuración.'
  - c. Haga clic en 'audio.'
  - d. Encontrará una sección de 'micrófono,' haga clic en 'micrófono.'

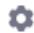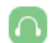

Audio

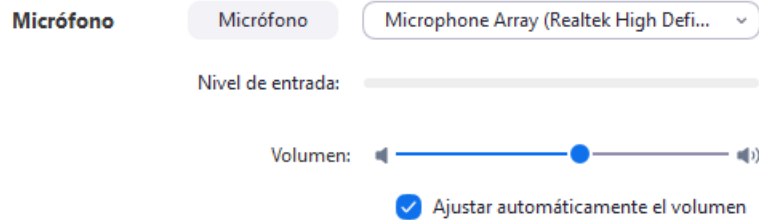

- i. Haga clic en 'ajustar automáticamente el volumen' si desea que Zoom ajuste el volumen automáticamente.

- e. Zoom empezará grabando su voz.

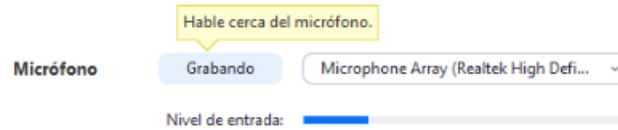

- f. Zoom reproducirá su voz. Si no la escucha, usa el menú desplegable para elegir un micrófono diferente hasta que escuche su voz.

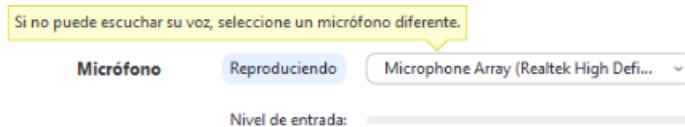

- g. Si no lo escucha, consulte la sección ['entrar al audio por teléfono'](#) para conectar a la reunión

## 2. Durante una reunión

- a. Navegue a los controles en la esquina inferior izquierda de la pantalla de la reunión. Haga clic en la flecha al lado de silenciar.

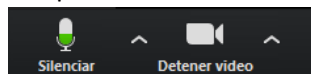

- b. Elige 'probar altavoz & micrófono.'

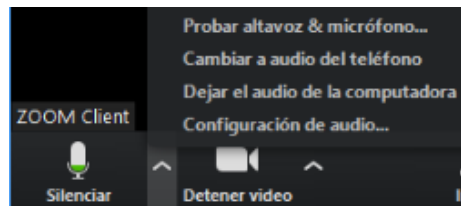

- c. Aparecerá un cuadro emergente y le pedirá que hable y grabe. Luego lo reproducirá y le preguntará si lo escuche. Haga clic en 'sí' o 'no.' Si no escucha su voz, intente usar el menú desplegable para cambiar el micrófono hasta que escuche la grabación.

Probando micrófono...

**Hable y deténgase, ¿escucha una repetición?**

Sí

No

Micrófono 1: Microphone Array (Realtek High Definiti... ▾

Nivel de entrada: 

**Micrófono**

Micrófono

Microphone Array (Realtek High Defini... ▾

Nivel de entrada: 

Volumen: 

☒ Ajustar automáticamente el volumen

- i. Si no lo escucha, consulte la sección '[entrar al audio por teléfono](#)' para conectar a la reunión.

- b. Ordenador portátil de Chrome (Google)

NOTA: Antes de unirse la reunión, la aplicación de Zoom debe descargarse. Consulte la sección '[descargar Zoom](#)' para más información.

NOTA 2: ZOOM para Chromebook solo está disponible en inglés. Por lo tanto, las fotos están en inglés y se explicarán en relación con los botones en inglés, que también se traducirán al español.

- i. Unirse a una reunión

1. Recibirá un email con el enlace de la reunión. Haga clic en el enlace y ZOOM abrirá.

to me ▾

Unirse a la reunión Zoom

<https://us04web.zoom.us/j/834496480?pwd=Ly9QUlRUQjhBZkorcEtmalp0ZWJhUT09>

2. ZOOM abrirá y el ID de reunión ya estará entrado para unir la reunión. Ingrese un nombre para que otros sepan quién es usted.

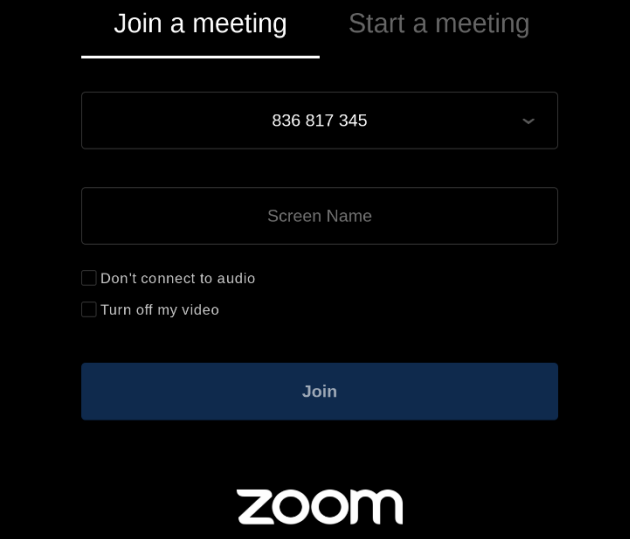

The image shows the 'Join a meeting' interface on a dark background. At the top, there are two tabs: 'Join a meeting' (active) and 'Start a meeting'. Below the tabs, there is a meeting ID input field containing '836 817 345' with a dropdown arrow. Underneath is a 'Screen Name' input field. Two checkboxes are present: 'Don't connect to audio' and 'Turn off my video'. A large blue 'Join' button is at the bottom, with the Zoom logo centered below it.

3. La reunión empezará.

ii. Empezar una reunión

1. Abre ZOOM y haga clic en 'sign in' (ingresar) en la parte superior de la página.

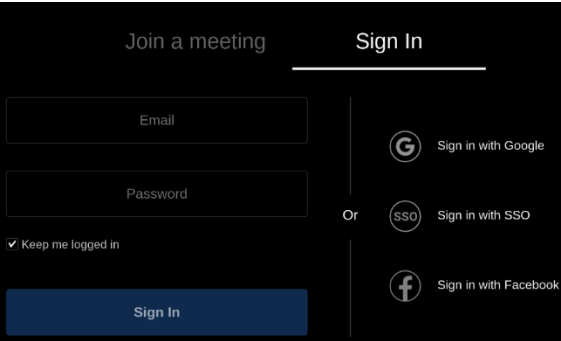

The image shows the 'Sign In' interface on a dark background. At the top, there are two tabs: 'Join a meeting' and 'Sign In' (active). On the left, there are input fields for 'Email' and 'Password', a checked checkbox for 'Keep me logged in', and a blue 'Sign In' button. On the right, there are three social login options: 'Sign in with Google' (G icon), 'Sign in with SSO' (SSO icon), and 'Sign in with Facebook' (f icon), separated by a vertical line and the word 'Or'.

2. Cuando haya ingresado, haga clic en 'start a meeting' (empezar una reunión) en la parte superior de la página.

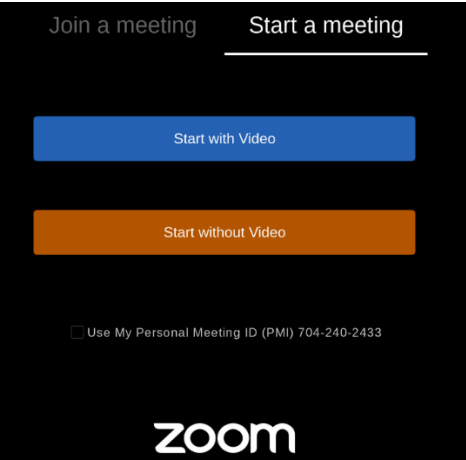

The image shows the 'Start a meeting' interface on a dark background. At the top, there are two tabs: 'Join a meeting' and 'Start a meeting' (active). Below the tabs, there are two large buttons: a blue 'Start with Video' button and an orange 'Start without Video' button. At the bottom, there is a checkbox for 'Use My Personal Meeting ID (PMI) 704-240-2433' and the Zoom logo.

- a. Empezar con video ('start with video,' el botón azul).

- i. Cuando elija esto, la reunión empezará con su video ya encendido.
- b. Empezar sin video ('start without video,' el botón anaranjado)
  - i. Cuando elija esto, la reunión empezará con su video apagado.
  - ii. Reiniciar video durante la reunión
    - i. Si desea reiniciar el video durante una reunión, haga clic en el botón 'start video' (reiniciar video).

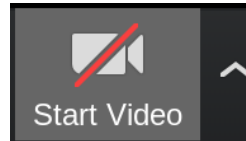

3. Su reunión empezará.

iii. Invitar otros

- 1. Inicia sesión en ZOOM y haga clic en 'start a meeting' (empezar una reunión).
- 2. Cuando su reunión haya empezado, haga clic en el botón 'invite' (invitar) en la parte inferior de la pantalla.

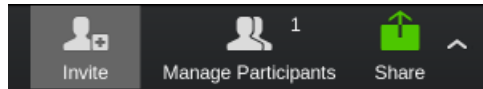

- 3. Se le pedirá que invite a otros por email, contactos, copiar URL o copiar invitación.
  - a. Invitar por email.

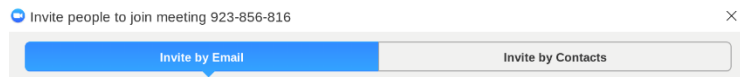

Choose your email service to send invitation

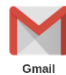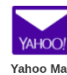

Copy URL Copy Invitation

Meeting Password: 439214

- i. Se le pedirá usar 'Gmail,' o 'Yahoo mail'
- ii. Elige la opción que le gustaría.
- iii. Le llevará a su servidor de e-mail para enviar correos electrónicos pre escritos a aquellos a quienes desea invitar.
- b. Invitar por contactos



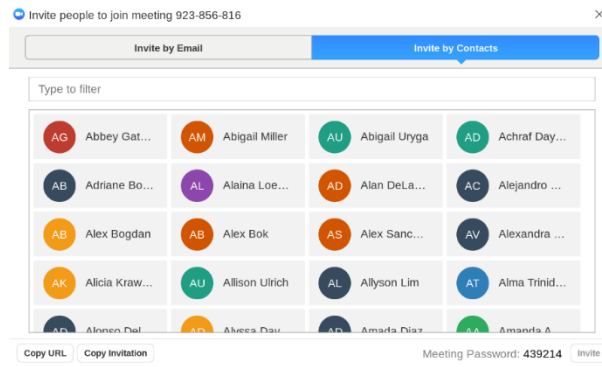

- i. Use esto si el e-mail de la persona que desea invitar ya se ha agregado a sus contactos.
  - i. Consulte la sección de [‘contactos’](#) para mas información.
  - ii. Seleccione el nombre de sus clientes haciendo clic en su contacto o buscando su nombre.
  - iii. Haga clic en ‘invitar’ en la esquina inferior derecha.
- c. Invitar por copiar la dirección de la página web (URL)

**Copy URL**

- i. Esto copiará el enlace a su portapapeles y puede pegarlo en cualquier lugar para enviarla a las personas que desea invitar.
- d. Invitar por copiar invitación

**Copy Invitation**

- i. Esto copiará el email de invitación con el enlace y toda la otra información del email a su portapapeles. Puede pegarla donde desea para invitar a otras personas.

#### iv. Probando el audio

##### 1. Durante una reunión

- a. Haga clic en la flecha al lado del símbolo del micrófono en la esquina inferior izquierda.

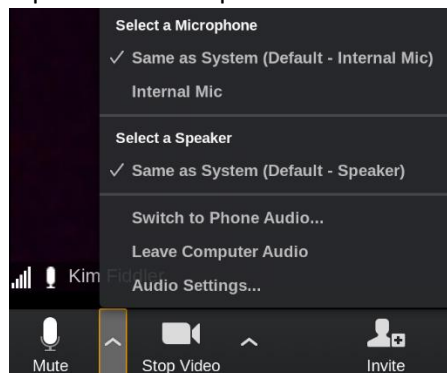

- b. Si tiene un altavoz diferente, elíjalo debajo de 'select a speaker' (selecciona un altavoz) para que Zoom pueda usarlo en vez del altavoz predeterminado.
    - c. Si no tiene otro altavoz, o si no funciona, puede '[entrar al audio por teléfono](#)' (join by phone audio).
  - v. Probando micrófono
    - 1. Durante una reunión
      - a. Haga clic en la flecha al lado del símbolo de micrófono en la esquina inferior izquierda.

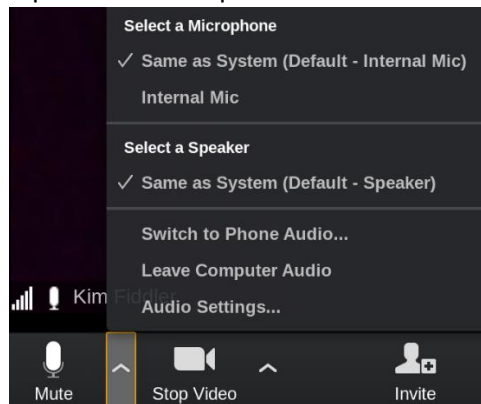

- b. Si tiene otro micrófono, elíjalo para que Zoom pueda usarlo.
      - c. Si no tiene otro micrófono, o si no funciona, puede '[entrar al audio por teléfono](#)' (join by phone audio).
  - c. Computadora de escritorio de MAC, Ordenador portátil de MAC
 

NOTA: Antes de unirse la reunión, la aplicación de Zoom debe descargarse. Consulte la sección '[descargar Zoom](#)' para más información.

i. Unirse a una reunión

1. A través de email

- a. Recibirá un email con el enlace de la reunión. Haga clic en el enlace y Zoom abrirá.

to me ▾

Unirse a la reunión Zoom

<https://us04web.zoom.us/j/834496480?pwd=Ly9QUlRUQjhBZkrcEtmalp0ZWJhUT09>

- b. Una ventana de la red abrirá y se le pedirá si puede abrir la aplicación Zoom. Dale permiso abrir la aplicación.

Open zoom.us?

<https://us04web.zoom.us> wants to open this application.

Cancel

Open zoom.us

- c. Su reunión empezará.
  - 2. A través de pantalla del inicio

- a. Inicia sesión en Zoom.
- b. Haga clic en 'nueva reunión.'

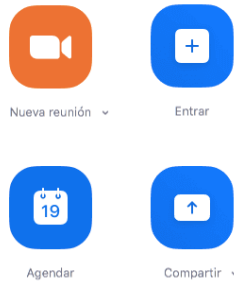

- c. Se le pedirá entrar la ID de la reunión que se encuentra en el email de invitación. Haga clic en 'entrar.'

**Entrar a una reunión**

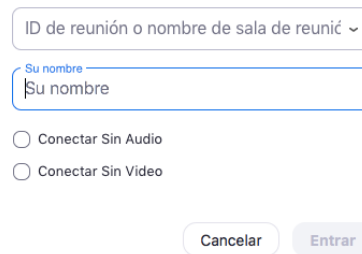

- d. Se le pedirá entrar la contraseña de la reunión que se encuentra en el email de invitación. Haga clic en 'continuar.'

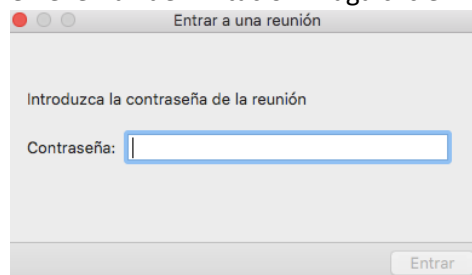

- e. Su reunión empezará.

ii. Empezar una reunión

1. Inicia sesión en Zoom.
2. Elige 'nueva reunión.'

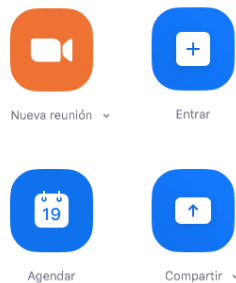

3. Su reunión empezará y puede invitar a otras personas para unirla.

4. Si desea programar una reunión, consulte la sección '[reuniones](#)' para más información.

iii. Invitar

1. Inicia sesión en Zoom.
2. Elige 'nueva reunión.'

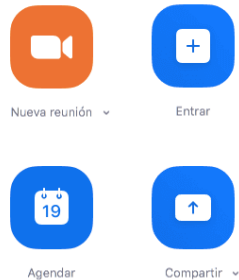

3. En la parte inferior izquierda de la pantalla de reunión, haga clic en 'Invitar' para abrir sus opciones de invitar.

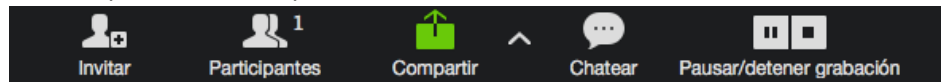

4. Puede invitar a otras personas por email, contactos, copiar la dirección de la página web, o copiar invitación.

a. Email

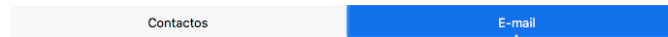

Elija su servicio de e-mail para enviar la invitación

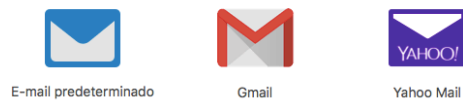

[Copiar la dirección de la página web](#) [Copiar invitación](#) Contraseña de la reunión: 522900

- i. Se le pedirá usar 'e-mail predeterminado,' 'Gmail,' o 'Yahoo mail.'
  - ii. Elige la opción que le gustaría.
  - iii. Le llevará a su servidor de e-mail para enviar correos electrónicos pre escritos a aquellos a quienes desea invitar.
- b. Contactos

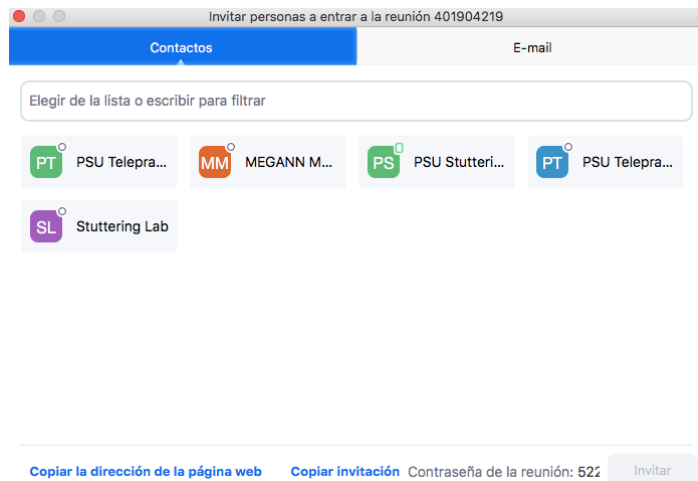

- i. Esto abrirá una ventana de sus contactos de Zoom. Puede buscar a las personas que desea invitar e invitarlas de esta manera.
  1. Consulte la sección '[contactos](#)' para más información.
- d. Copiar la dirección de la página web

#### Copiar la dirección de la página web

- i. Esto copiará el enlace a su portapapeles y puede pegarlo en cualquier lugar para enviarla a las personas que desea invitar.
- e. Copiar invitación
  - i. Esto copiará el email de invitación con el enlace y toda la otra información del email a su portapapeles. Puede pegarla donde desea para invitar a otras personas.

#### Copiar invitación

- vi. Probando el audio
  1. Antes de Unirse a una reunión
    - a. Inicia sesión en Zoom.
    - b. Haga clic en 'configuración.'
    - 
    - c. Haga clic en 'audio.'

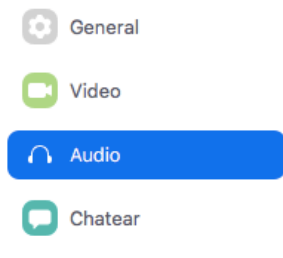

- d. Encontrará una sección de 'altavoz.' Elige 'probar altavoz.'

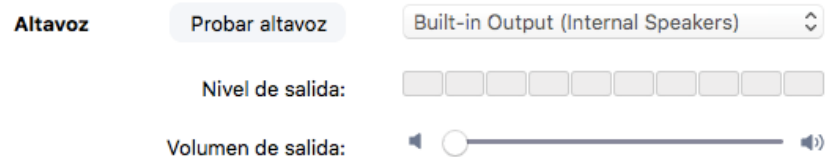

- e. Se abrirá una nueva ventana y Zoom emitirá un sonido y le preguntará si puede escucharlo.

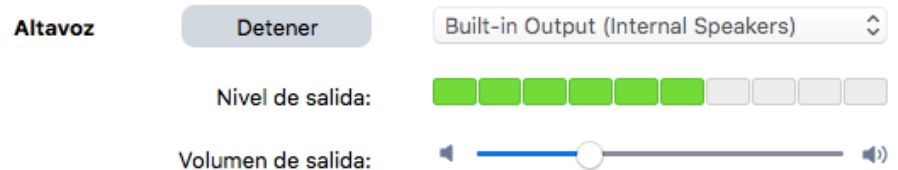

- i. Si no lo escucha, elige un altavoz diferente de la lista desplegable para probar o consulte la sección '[entrar al audio por teléfono](#)' para conectar a la reunión.

2. Durante una reunión

- a. Navegue a la parte inferior izquierda de la pantalla. Haga clic en el botón del micrófono. Asegúrese que el símbolo del micrófono se ve como abajo.

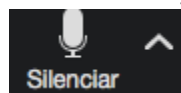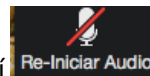

- i. Si se ve así, toque el símbolo una vez hasta que se vea como el de arriba.
- b. Si el símbolo se ve como arriba pero el audio todavía no funciona, haga clic en el flecho al lado de 'silenciar' y elige 'probar altavoz & micrófono.'

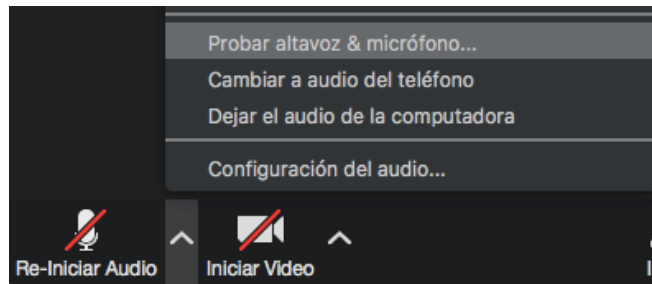

- c. Aparecerá un cuadro emergente y le preguntará si escucha el tono. Haga clic en "sí" o "no". Si no escucha el sonido, intente usar el menú desplegable para cambiar los altavoces hasta que escuche el sonido.

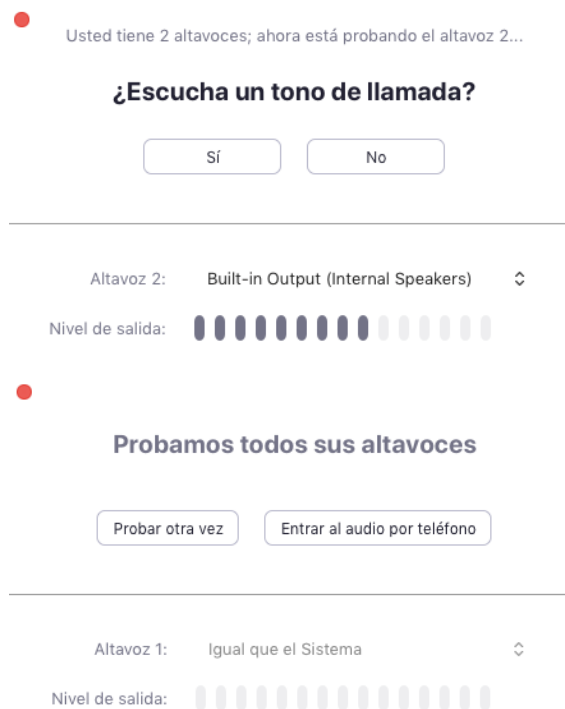

- i. Si no lo escucha, consulte la sección [‘entrar al audio por teléfono’](#) para conectar a la reunión.
- vii. Probando el micrófono
1. Antes de Unirse a una reunión
    - a. Inicia sesión en Zoom y haga clic en ‘configuraciones.’
    - 
    - b. Haga clic en ‘audio’

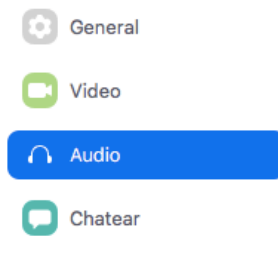

- c. Encontrará una sección de 'micrófono,' haga clic en 'micrófono.'

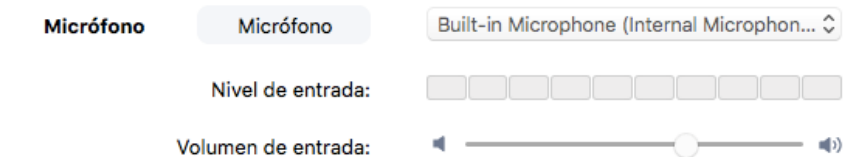

- d. Zoom le pedirá que hable para que puedan grabar su voz. Zoom reproducirá la grabación y le preguntará si la escucha.

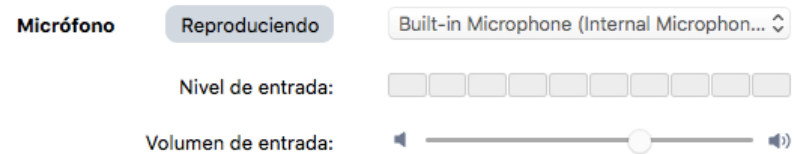

- e. Una ventana emergente abrirá y se le pedirá si escuche la grabación. Elige 'sí' o 'no.'
- f. Si no lo escucha, consulte la sección ['entrar al audio por teléfono'](#) para conectar a la reunión.

## 2. Durante una reunión

- a. Navegue a los controles en la esquina inferior izquierda de la pantalla de la reunión. Haga clic en la flecha al lado de 'silenciar.'

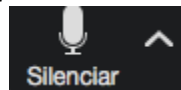

- b. Elige 'probar altavoz & micrófono.'

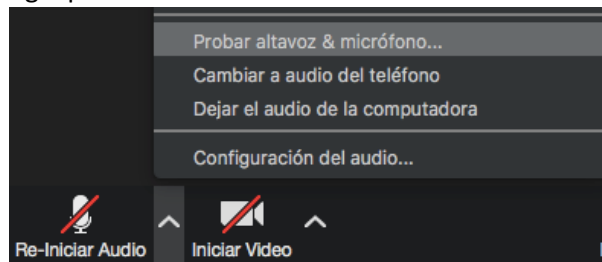

- c. Una ventana nueva abrirá y Zoom probará su altavoz primero. Sigue las instrucciones.



Usted tiene 2 altavoces; ahora está probando el altavoz 2...

**¿Escucha un tono de llamada?**

Sí

No

Altavoz 2: Built-in Output (Internal Speakers) ⬆ ⬇ ⬇ ⬆

Nivel de salida: 

- d. De vez en cuando Zoom haya terminado probando el altavoz, probará el micrófono. Zoom le pedirá que hable para que puedan grabar su voz. Zoom reproducirá la grabación y le preguntará si la escucha.

Usted tiene 2 micrófonos; ahora está probando el micrófono 2...

**Hable y deténgase, ¿escucha una repetición?**

Sí

No

2 de micrófono: Built-in Microphone (Internal Micropho... ⬆ ⬇ ⬇ ⬆

Nivel de entrada: 

- e. Si escuchas la grabación, elige 'sí,' si no la escuchas, elige 'no.'
- i. Si no la escuchas, Zoom probará otros micrófonos, si uno tiene.

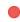

**Probamos todos sus micrófonos**

Probar otra vez

Entrar al audio por teléfono

1 de micrófono: Igual que el Sistema ⬆ ⬇ ⬇ ⬆

Nivel de entrada: 

- ii. Si no lo escucha, consulte la sección '[entrar al audio por teléfono](#)' para conectar a la reunión.

b. iPad

NOTA: Antes de unirse la reunión, la aplicación de Zoom debe descargarse. Consulte la sección '[descargar Zoom](#)' para más información.

i. Unirse a una reunión

1. A través de email

- a. Recibirá un email con el enlace de la reunión. Haga clic en el enlace y ZOOM abrirá.

Unirse a la reunión Zoom

<https://pdx.zoom.us/j/465348901?pwd=>

[S1E3b0MveG9hMWFKS3ZSNGwydEJWUT09](https://pdx.zoom.us/j/465348901?pwd=S1E3b0MveG9hMWFKS3ZSNGwydEJWUT09)

- b. Se le pedirá unir su audio y le dará unas opciones. Elija ‘marcar usando Internet.’ Elige ‘marcar utilizando de Internet.’

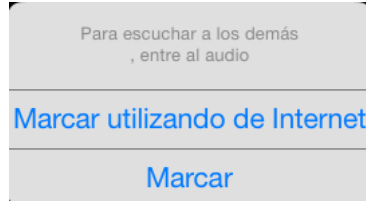

- i. Marcar utilizando de Internet
  - i. Si elige esto, su reunión empezará y no necesita hacer nada más.
- ii. Marcar
  - i. Si su iPad tiene capacidades celulares y desea usarlas, elija ‘marcar.’
  - ii. Cuando elija esto, elige uno de los números provistos para conectar a la reunión.

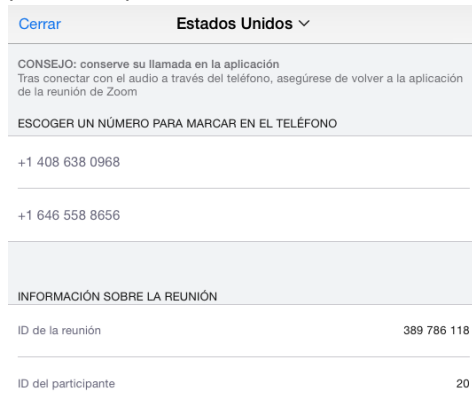

- iii. Cuando haya llamado se le pedirá entrar el ID de la reunión y la ID del participante seguido por #.
- iv. Si el país o región en la parte superior de la pantalla no es correcto, tócalo una vez y otras opciones aparecerá. Elige el país correcto y usa esos números provistos para conectar a la reunión.

| < Atrás   | País o región |
|-----------|---------------|
| A         | A             |
| Alemania  | •             |
| Argentina | •             |
| Australia | •             |
| Austria   | •             |
| B         | J             |
| Bahréin   | •             |
|           | M             |

v. Su reunión empezará.

2. A través de pantalla inicio

a. Inicia sesión en ZOOM y elige 'entrar.'

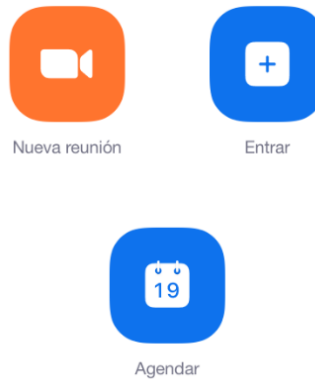

b. Se le pedirá entrar el ID de reunión, un código de 9, 10, o 11 dígitos se encuentra en el email de invitación. Entrar su nombre para que los demás saben quién es usted. Haga clic en 'entrar.'

[Cancelar](#)

**Entrar a una reunión**

---

ID de la reunión

---

[Incorporarse con un nombre de sala de reuniones](#)

---

Nombre en pantalla

---

**Entrar**

Si recibió un enlace de invitación, pulse el enlace otra vez para entrar a la reunión

c. Se le pedirá entrar la contraseña de la reunión que se encuentra en el email de invitación. Haga clic en 'continuar.'

**Introduzca su contraseña de la reunión**

[Cancelar](#)

**Continuar**

- d. Su reunión empezará.
- ii. Empezar una reunión
  1. Inicia sesión en Zoom.
  2. Elige 'nueva reunión.'

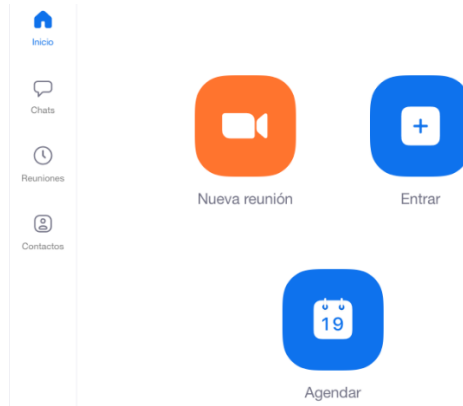

3. Se le pedirá unir su audio y le dará unas opciones. Elige 'marcar utilizando de Internet.'

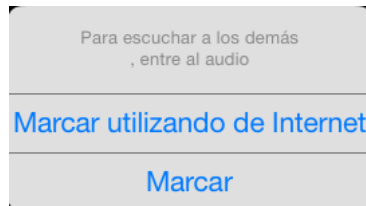

- a. Marcar utilizando de Internet
  - i. Si elige esto, su reunión empezará y no necesita hacer nada más.
- b. Marcar
  - i. Si su iPad tiene funciones celulares y desea usarlas elige 'marcar.'
  - ii. Cuando elija esto, elige uno de los números provistos para conectar a la reunión.

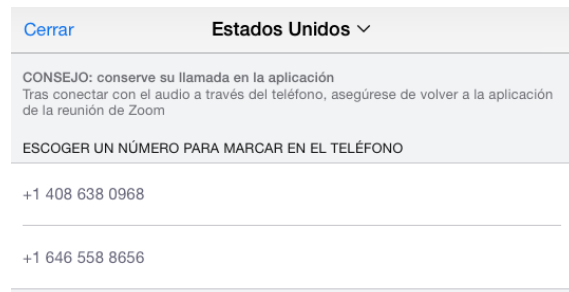

- iii. Cuando haya llamado se le pedirá entrar el ID de la reunión y la ID del participante seguido por el signo '#.'
- iv. Si el país o región en la parte superior de la pantalla no es correcto, tócalo una vez y otras opciones aparecerá.

Elige el país correcto y usa esos números provistos para conectar a la reunión.

| < Atrás País o región |   |
|-----------------------|---|
| A                     |   |
| Alemania              | A |
| Argentina             | C |
| Australia             | F |
| Austria               | H |
| B                     | J |
| Bahréin               | M |

### iii. Invitar

1. Inicia sesión en Zoom.
2. Elige 'nueva reunión.'

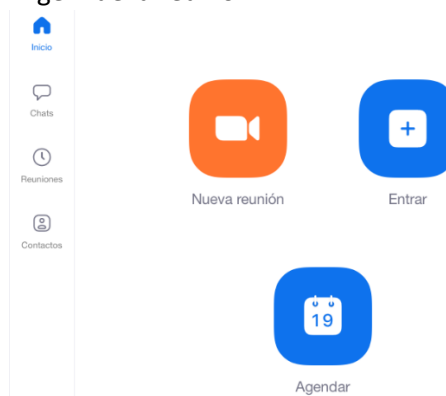

3. La reunión empezará.
4. Haga clic en el botón 'participantes' en el parte superior derecho de la pantalla. La lista de los participantes abrirá.

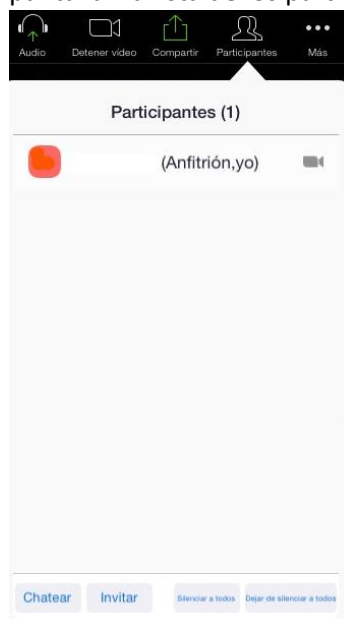

- a. En la parte inferior izquierda en la pantalla de participantes haga clic en el botón 'invitar.'



- b. Las opciones de invitar aparecerán.

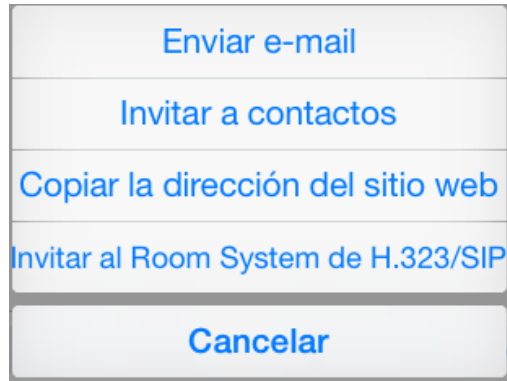

- i. Enviar email
    - i. Esto abrirá su cuenta de email para enviar el email de invitación a otras personas.
  - ii. Invitar a contactos
    - i. Esto abrirá una ventana de sus contactos de ZOOM. Puede buscar a las personas que desea invitar e invitarlas de esta manera.
      - a. Consulte la sección '[contactos](#)' para más información.
  - iii. Copiar la dirección del sitio web
    - i. Esto copiará el enlace a su portapapeles y puede pegarlo en cualquier lugar para enviarla a las personas que desea invitar.
  - iv. Invitar al Room System
    - i. La función de llamada del conector de sala H.323 / SIP le permite marcar a un sistema de sala H.323 o SIP desde Zoom Client utilizando la dirección IP pública o SIP URI asignado al dispositivo.
    - ii. Para más información sobre esta función, va a la página en línea de Zoom '[room system.](#)'
- iv. Probando el audio
- 1. Asegúrese que el símbolo del audio en la parte superior izquierda se ve como la foto debajo.

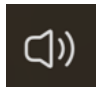

- a. Si no se ve así, tócalo una vez para encender el audio.

2. Incrementar o disminuir el volumen usando los botones de su dispositivo.
  3. Usa audífonos.
  4. Intenta usar la función '[marcar](#)' descrita anteriormente.
  5. Reiniciar su dispositivo.
  6. Reinstalar ZOOM.
- v. Probando el micrófono
1. Asegúrese que su micrófono no está silenciado. Si se ve como la foto debajo, tócalo una vez para encenderla.  

  2. Asegúrese que el audio de su dispositivo está conectado. Si el símbolo del audio se ve como la foto debajo, tócalo y elige 'marcar utilizando de internet.'  

  3. Intenta usar audífonos con micrófono.
  4. Asegúrese que ZOOM tiene permisión de usar su micrófono. Va a Ajustes > Privacidad > Micrófono y asegúrese que ZOOM tiene permisión para usarlo.  

  5. Cierre otras aplicaciones usando el micrófono.
  6. Intenta usar la función '[marcar](#)' descrita anteriormente.
  7. Si todavía este silenciado, es posible el anfitrión le ha silenciado.
  8. Reinstalar ZOOM.

c. iPhone

NOTA: Antes de unirse la reunión, la aplicación de Zoom debe descargarse. Consulte la sección '[descargar Zoom](#)' para más información.

i. Unirse a una reunion

1. A través de email

- a. Recibirá un email con el enlace de la reunión. Haga clic en el enlace.

Ingrese Zoom a la reunión de Zoom en  
curso.

hoy, 5:41 p. m.

Unirse a la reunión Zoom

<https://zoom.us/j/400660318?>

[pwd=eTgzek45WW5aS2pXdFI3cGZ2emVHQ109](https://zoom.us/j/400660318?pwd=eTgzek45WW5aS2pXdFI3cGZ2emVHQ109)

- b. Zoom le pedirá acceder al micrófono. Elige 'OK.'

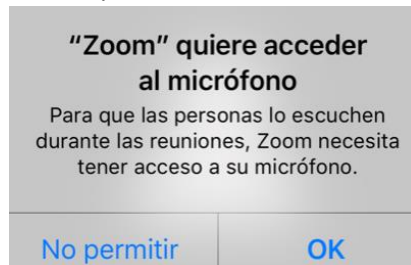

- c. Zoom le pedirá acceder la cámara. Elige 'OK.'

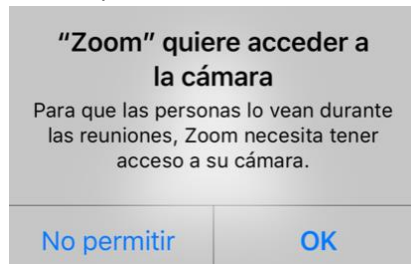

- d. Se le pedirá unir su audio y le dará unas opciones.

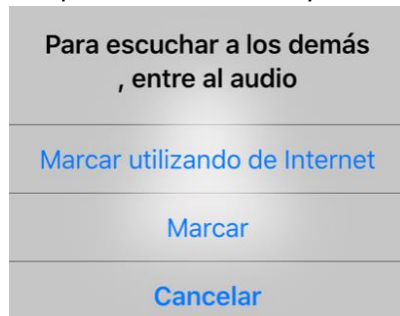

- e. Marca utilizando de internet
- i. Cuando elijas esto, su reunión empezará inmediatamente y no necesita hacer nada más.
- f. Marcar



- i. Una ventana nueva aparecerá y se le pedirá elegir cual número de teléfono le gustaría llamar.



Cerrar Estados Unidos ▾

CONSEJO: conserve su llamada en la aplicación  
Tras conectar con el audio a través del teléfono, asegúrese de volver a la aplicación de la reunión de Zoom

SELECCIONAR UN NÚMERO PARA MARCAR

+1 669 900 9128

+1 646 558 8656

La ID de la reunión y la ID del participante se marcarán automáticamente. Puede ignorar los mensajes que le piden estos números.

- ii. Cuando haya llamado se le pedirá entrar el ID de la reunión y la ID del participante seguido por #.
- iii. Si el país o región anterior no es correcto, tóquelo una vez para abrir una página donde puede elegir el país correcto y llamar a los números provistos para ese país.

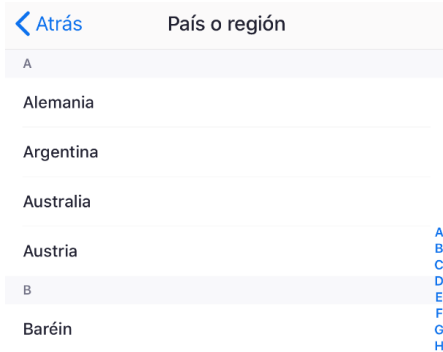

< Atrás País o región

A

Alemania

Argentina

Australia

Austria

B

Baréin

A  
B  
C  
D  
E  
F  
G  
H

- iv. Su reunión empezará.

## 2. A través de pantalla de inicio

- a. Inicia sesión en Zoom y elige 'entrar.'

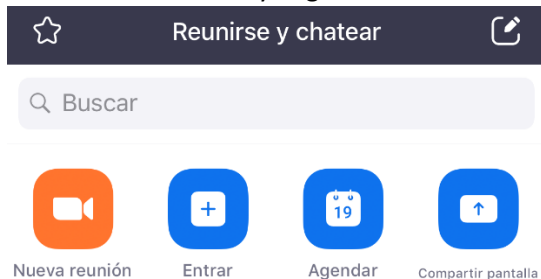

☆ Reunirse y chatear

🔍 Buscar

Nueva reunión Entrar Agendar Compartir pantalla

- b. Se le pedirá entrar el ID de reunión, un código de 9, 10, o 11 dígitos se encuentra en el email de invitación. Entrar su nombre para que los demás saben quién es usted. Haga clic en 'entrar.'

[Cancelar](#) Entrar a una reunión

ID de la reunión

[Incorporarse con un nombre de sala de reuniones](#)

Nombre en pantalla

[Entrar](#)

Si recibió un enlace de invitación, pulse el enlace otra vez para entrar a la reunión

- c. Se le pedirá entrar la contraseña de la reunión que se encuentra en el email de invitación. Haga clic en 'continuar.'

Introduzca su contraseña de la reunión

Contraseña

[Cancelar](#) Continuar

- d. Su reunión empezará.

ii. Empezar una reunión

1. Inicia sesión en Zoom.
2. Elige 'nueva reunión.'

★ Reunirse y chatear ✎

🔍 Buscar

 Nueva reunión
  Entrar
  Agendar
  Compartir pantalla

3. Se le pedirá unir su audio y le dará unas opciones.

Para escuchar a los demás  
, entre al audio

[Marcar utilizando de Internet](#)

[Marcar](#)

[Cancelar](#)

- a. Marca utilizando de internet
  - i. Cuando elijas esto, su reunión empezará inmediatamente y no necesita hacer nada más.
- b. Marcar

- i. Una ventana nueva aparecerá y se le pedirá elegir cual número de teléfono le gustaría llamar.

[Cerrar](#) **Estados Unidos** ▼

CONSEJO: conserve su llamada en la aplicación  
Tras conectar con el audio a través del teléfono, asegúrese de volver a la aplicación de la reunión de Zoom

SELECCIONAR UN NÚMERO PARA MARCAR

+1 669 900 9128 

+1 646 558 8656 

La ID de la reunión y la ID del participante se marcarán automáticamente. Puede ignorar los mensajes que le piden estos números.

- ii. Cuando haya llamado se le pedirá entrar el ID de la reunión y la ID del participante seguido por #.
- iii. Si el país o región anterior no es correcto, tóquelo una vez para abrir una página donde puede elegir el país correcto y llamar a los números provistos para ese país.

[< Atrás](#) **País o región**

A

Alemania

Argentina

Australia

Austria

B

Baréin

A  
B  
C  
D  
E  
F  
G  
H

- iv. Su reunión empezará.

iii. Invitar

1. Inicia sesión en Zoom.
2. Elige 'nueva reunión.'

 **Reunirse y chatear** 

 Buscar

   

Nueva reunión Entrar Agendar Compartir pantalla

3. La reunión empezará.
4. Haga clic en el botón 'participantes' en la parte inferior de la página. La lista de los participantes abrirá.

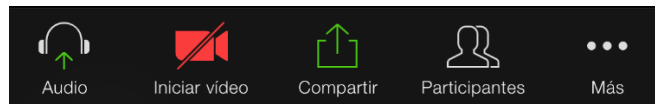

5. Haga clic en el botón 'invitar' en la parte inferior de la página de participantes.

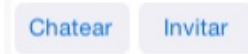

6. Las opciones de invitar aparecerán.

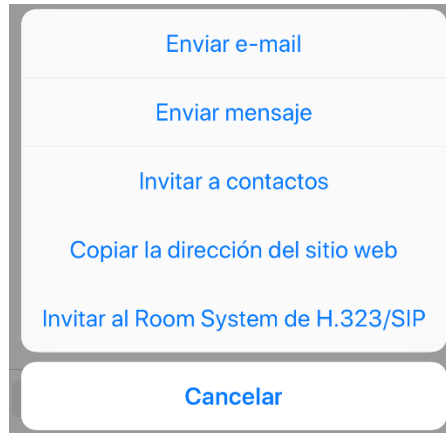

- a. Enviar email
    - i. Esto abrirá su cuenta de email para enviar el email de invitación a otras personas.
  - b. Enviar Mensaje
    - i. Esto abrirá sus mensajes de texto con el enlace de la reunión para que pueda enviarlo a cualquier persona.
  - c. Invitar a contactos
    - i. Esto abrirá una ventana de sus contactos de ZOOM. Puede buscar a las personas que desea invitar e invitarlas de esta manera.
  - d. Copiar la dirección del sitio web
    - i. Esto copiará el enlace a su portapapeles y puede pegarlo en cualquier lugar para enviarla a las personas que desea invitar.
  - e. Invitar al Room System
    - i. La función de llamada del conector de sala H.323 / SIP le permite marcar a un sistema de sala H.323 o SIP desde Zoom Client utilizando la dirección IP pública o SIP URI asignado al dispositivo.
    - ii. Para más información sobre esta función, va a la página en línea de Zoom '[room system.](#)'
- iv. Probando el audio
    1. Asegúrese que el símbolo del audio en la esquina superior izquierda se ve como la foto debajo.

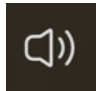

2. Asegúrese que el audio esté unido a la reunión. Si ve la foto debajo, tócalo una vez para unir al audio. Elige 'marcar usando de Internet.'

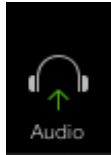

Para escuchar a los demás  
, entre al audio

Marcar utilizando de Internet

Marcar

Cancelar

3. Si no se ve como la foto, tócalo una vez para encender el audio.
  4. Incrementar o disminuir el volumen usando los botones de su dispositivo.
  5. Usa audífonos.
  6. Intentar conectar su audio por 'marcar.' Consulte la sección '[marcar](#)' para más información.
  7. Reiniciar su dispositivo.
  8. Reinstalar la aplicación Zoom.
- v. Probando el micrófono
1. Asegúrese que no ha silenciado su micrófono. Si el botón del micrófono se ve como la foto debajo, tócalo una vez para activar el micrófono.

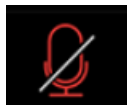

2. Usar audífonos con micrófono.
3. Asegúrese que Zoom tiene permisión usar el micrófono.
  - a. Vaya a Ajustes > Privacidad > Micrófono y asegúrese que ZOOM tiene permisión para usarlo.

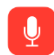

Micrófono

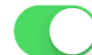

4. Cerrar otras aplicaciones usando el micrófono.
5. Intentar conectar su audio por 'marcar.' Consulte la sección '[marcar](#)' para más información.
6. Si todavía este silenciado, es posible el anfitrión le ha silenciado.
7. Reiniciar Zoom.

d. Android

NOTA: Antes de unirse la reunión, la aplicación de Zoom debe descargarse. Consulte la sección '[descargar Zoom](#)' para más información.

i. Unirse a una reunión

1. A través de email

- a. Recibirá un email con el enlace de la reunión. Haga clic en el enlace y Zoom abrirá.

Unirse a la reunión Zoom

<https://pdx.zoom.us/j/465348901?pwd=S1E3b0MveG9hMWFKS3ZSNGwydEJWUT09>

ID de reunión: 465 348 901

Contraseña: 408625

- b. Zoom abrirá y empezará el videochat.

- c. Se le pedirá unir su audio y le dará unas opciones.

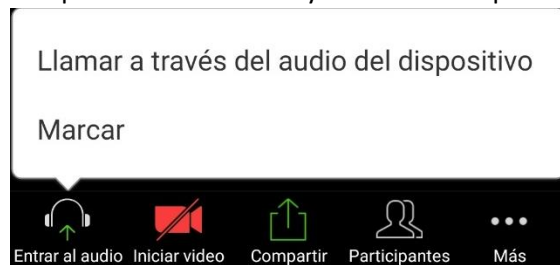

- i. Llamar a través del audio del dispositivo

- i. Esto le deja usar el micrófono y altavoz de su dispositivo para la reunión.

- ii. Marcar

- i. Para usar esto, necesitara dar permisión a Zoom hacer llamadas.

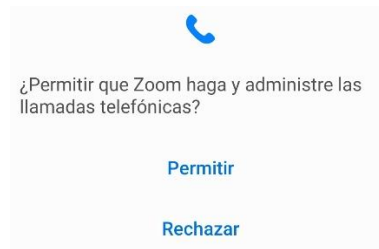

- ii. Una página nueva aparecerá y se le pedirá elegir cual número de teléfono le gustaría llamar.

< Regresar
Argentina

SELECCIONAR UN NÚMERO PARA MARCAR

+54 341 512 2188
+54 343 414 5986
+54 112 040 0447

La ID de la reunión y la ID del participante se marcarán automáticamente. Puede ignorar los mensajes que le piden estos números.

Si utiliza otro dispositivo para marcar, también puede necesitar la siguiente información

|                        |             |
|------------------------|-------------|
| ID de la reunión       | 646 546 289 |
| ID del el participante | 49          |

- iii. Cuando haya llamado se le pedirá entrar el ID de la reunión y la ID del participante seguido por el signo '#.'
- iv. Si el país o región anterior no es correcto, tóquelo una vez para abrir una página donde puede elegir el país correcto y llamar a los números provistos para ese país.

<
País/región

Buscar

A

Alemania

Argentina

Australia

Austria

B

Baréin

2. A través de la pantalla de inicio
  - a. Inicia sesión en Zoom y elige 'entrar.'

☆
Reunión y Chat

Buscar contactos

Nueva reunión

Entrar

Programar

Compartir

- b. Se le pedirá entrar el ID de reunión, un código de 9, 10, o 11 dígitos se encuentra en el email de invitación. Entrar su nombre para que los demás saben quién es usted. Haga clic en 'entrar a la reunión.'



- c. Se le pedirá entrar la contraseña de la reunión que se encuentra en el email de invitación. Haga clic en 'OK.'

**Introduzca su contraseña de la reunión**



- d. Su reunión empezará.  
e. Si desea programar una reunión, consulte la sección '[reuniones](#)' para más información.
- ii. Empezar una reunión

1. Abrir la aplicación Zoom e inicia sesión.

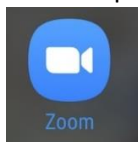

2. Elige 'nueva reunión.'

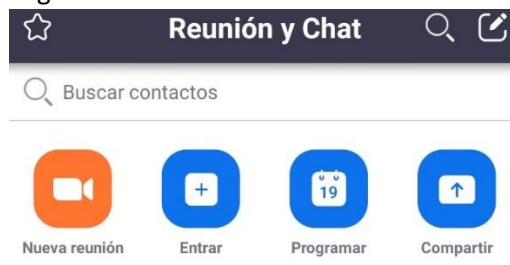

3. Se abrirá una nueva pantalla y le pedirá si quiere empezar el video con su video encendido o usar su ID personal de la reunión (una ID de reunión siempre asignada a usted). Elige que le gustaría y haga clic en 'iniciar una reunión.'



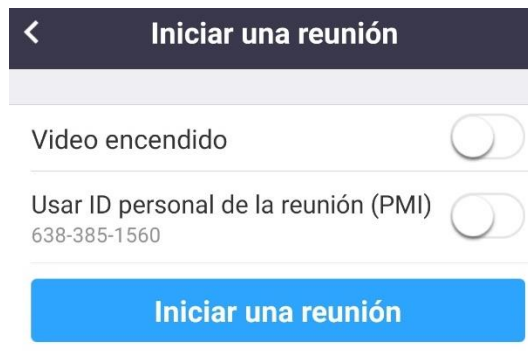

iii. Invitar

1. Inicia sesión en Zoom.
2. Elige 'nueva reunión.'

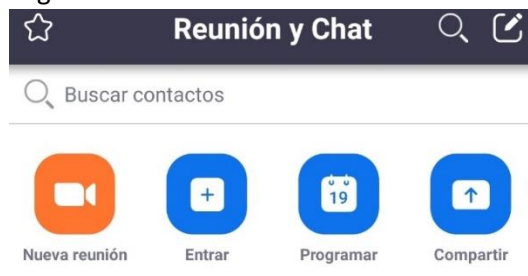

3. Haga clic en el botón 'participantes' en la parte inferior de la pantalla. La lista de los participantes abrirá.
4. Haga clic en 'invitar' en la parte inferior de la pantalla de participantes.

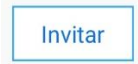

5. Las opciones de invitar aparecerán.

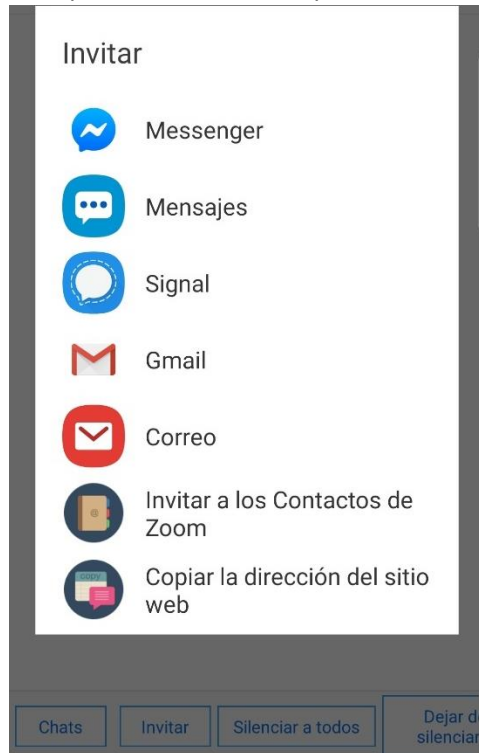

6. Messenger

- a. Esto abrirá Facebook Messenger para enviar la invitación a la reunión pre escrita a otras personas.

7. Mensajes, Signal

- a. Esto abrirá sus mensajes de texto para enviar la invitación a la reunión pre escrita a otras personas.

8. Gmail, Correo

- a. Esto abrirá su cuenta de email para enviar el email de invitación a la reunión pre escrita a otras personas.

9. Invitar a los contactos de Zoom

- a. Use esto si el e-mail de su cliente ya se ha agregado a sus contactos.
  - i. Consulte la sección de [‘contactos’](#) para más información.
- b. Seleccione el nombre de sus clientes haciendo clic en su contacto o buscando su nombre.
- c. Haga clic en ‘invitar’ en la esquina inferior derecha.

10. Copiar la dirección de la página web

- a. Esto copiará el enlace a su portapapeles y puede pegarlo en cualquier lugar para enviarla a las personas que desea invitar.

iv. Probando el audio

1. Asegúrese que el símbolo del audio en la parte superior izquierda se ve como la foto debajo.

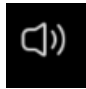

- a. Si no se ve así, tócalo una vez para encender el audio.
  2. Incrementar o disminuir el volumen usando los botones de su dispositivo.
  3. Usa audífonos.
  4. Consulte la sección '[marcar](#)' para Android para entrar al audio por teléfono.
  5. Reiniciar su dispositivo.
  6. Reinstalar Zoom.
  - v. Probando el micrófono
    1. Asegúrese que su micrófono no está silenciado. Si se ve como la foto debajo, tócalo una vez para encenderla.
- 
2. Asegúrese que el audio de su dispositivo está conectado. Si el símbolo del audio se ve como la foto debajo, tócalo y elige 'marcar utilizando de internet.'
  3. Intenta usar audífonos con micrófono.
  4. Asegúrese que Zoom tiene permiso de usar su micrófono.
    - a. Vaya a Ajustes > Aplicaciones > Zoom > Accesos y Asegúrese que Zoom tiene permiso para usarlo.
- 
5. Cierre otras aplicaciones usando el micrófono.
  6. Consulte la sección '[marcar](#)' para Android para entrar al audio por teléfono.
  7. Si todavía está silenciado, es posible que el host lo haya silenciado.
  8. Reinstalar Zoom.

## B. Preguntas frecuentes de Zoom

- a. El eco (tomado de [Zoom FAQ: El Eco](#))
  - i. Hay tres razones posibles para el eco
    1. Se está utilizando audio de computadora y teléfono
      - a. Puede abandonar el audio de la computadora manualmente en su computadora o teléfono.
    - i. Teléfono
      - i. Haga clic en el botón 'más' y elige 'desconectar audio.'

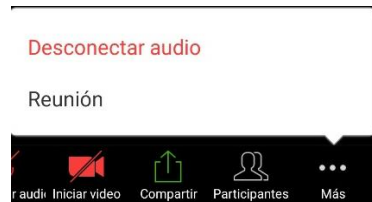

ii. Computadora

- i. Haga clic en el símbolo del micrófono y elige 'dejar el audio de la computadora.'

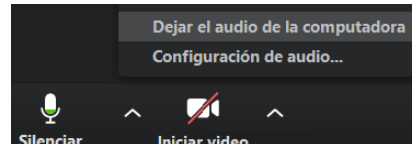

- b. Si haya llamado para conectar a la reunión, ingresa su ID del participante al llamar, o ingresar su ID del participante, seguido por el signo '#,' cuando ya esté en la llamada.
2. Los altavoces de la computadora o el teléfono de los participantes están demasiado cerca los unos de los otros.
- a. Si otro participante está demasiado cerca de usted y los dos tienen los altavoces activados, abandone el audio de la conferencia en una de las computadoras o desconecte el teléfono.
3. Varias computadoras con audio activo en la misma sala de conferencias
- a. Si está en una sala de conferencias con varios dispositivos, desconecte el audio de la computadora de los demás dispositivos.

i. Teléfono

- i. Haga clic en el botón 'más' y elige 'desconectar audio.'

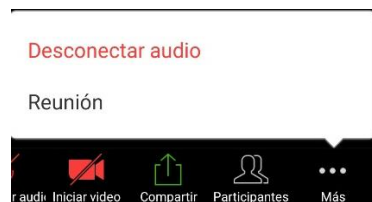

ii. Computadora

- i. Haga clic en el símbolo del micrófono y elige 'dejar el audio de la computadora.'

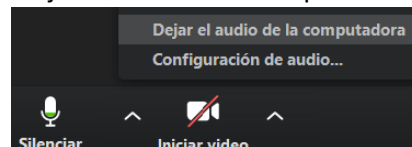

- iii. Cancelar el audio no es suficiente ya que cancela solo el audio del micrófono, pero el altavoz sigue activado.
- ii. Silenciar el altavoz no resolverá el eco porque el altavoz todavía está activo.

iii. Otras sugerencias para el eco

1. Si escuchas eco, significa que hay un dispositivo que está canalizando su audio.
2. Para aislar el asistente, el anfitrión puede:
  - a. cancelar el audio de los participantes de a uno por vez.
  - b. reactivar el audio de todos o reactivar el audio de a uno por vez
  - c. cancelar su propio audio.
3. El eco también puede relacionarse con:
  - a. Los altavoces que tiene el volumen demasiado alto (tv, barra de sonido).
  - b. La cancelación del eco ha fallado (problema del dispositivo o de funcionamiento).
  - c. Micrófono de mala calidad.

b. Entrar al audio por teléfono

- i. Si el audio de la computadora no funciona después de probarlo, Zoom le proporcionará números de teléfono para que pueda llamar para conectarse a la reunión.
- ii. Durante una reunión, haga clic en la flecha al lado del símbolo del micrófono en la parte inferior izquierda de la pantalla. Haga clic en 'cambiar a audio del teléfono.'

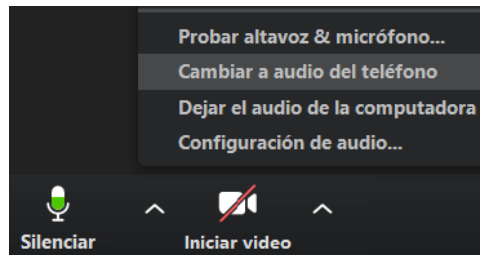

iii. Una ventana nueva abrirá con los números de teléfono que puede usar para conectarse a la reunión por teléfono.

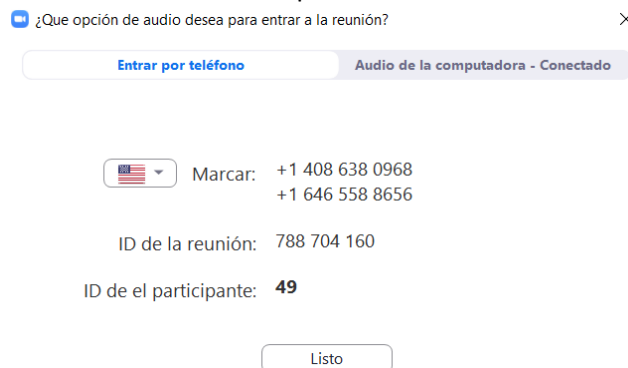

1. Una vez que haya llamado a la reunión, Zoom le pedirá que ingrese la ID de la reunión y la ID del participante, seguido del signo '#.'

#### Referencias

Symon, J. B. (2001). Parent Education for Autism: Issues in Providing Services at a Distance.

*Journal of Positive Behavior Interventions*, 3(3), 160. <https://doi->

[org.proxy.lib.pdx.edu/10.1177/109830070100300304](https://doi-org.proxy.lib.pdx.edu/10.1177/109830070100300304)

Zoom Communications, Inc. (2017) *HIPAA Compliance Guide* [PDF] Retrieved from

[https://zoom.us/healthcare.](https://zoom.us/healthcare)
